# Supplementary material for: Methylome and transcriptome responses to feed stress induced by low-energy diet in liver and blood of laying hens
Source: Research Square preprint supplement (doi:10.21203/rs.3.rs-8711276/v1), 2026-02-23
Supplement: Supplementary file 1 [file 09e9fd2b33328f5599bf298d.docx]

Table S1. General statistics of RRBS analyses

| **Tissue** | **Sample name** | **Depth**  **(after preprocessing)** | **Number of reads** | **Aligned (%)** | **Number of mapped reads (million)** |
| --- | --- | --- | --- | --- | --- |
| liver | F0815FS | 22.29 | 15,313,421 | 64.1 | 9.8 |
| liver | F0754FS | 84.62 | 57,501,880 | 64.0 | 36.8 |
| liver | F0935CT | 13.94 | 9,329,726 | 63.8 | 6.0 |
| liver | F0920FS | 16.49 | 11,276,200 | 63.4 | 7.2 |
| liver | F0629CT | 27.56 | 19,883,450 | 62.7 | 12.5 |
| liver | F0592FS | 38.60 | 25,570,154 | 62.5 | 16.0 |
| liver | F0602CT | 24.20 | 17,623,867 | 62.5 | 11.0 |
| liver | F0966FS | 13.04 | 9,866,333 | 62.5 | 6.2 |
| liver | F0978FS | 47.39 | 34,023,699 | 62.4 | 21.2 |
| liver | F1006CT | 13.76 | 9,384,817 | 62.1 | 5.8 |
| liver | F0827FS | 24.27 | 17,343,339 | 62.0 | 10.7 |
| liver | F0738CT | 28.14 | 20,391,172 | 61.7 | 12.6 |
| liver | F0777CT | 27.34 | 19,813,622 | 61.7 | 12.2 |
| liver | F1102CT | 25.78 | 19,544,299 | 61.7 | 12.1 |
| liver | F0835CT | 39.56 | 28,772,636 | 61.6 | 17.7 |
| liver | F1073FS | 26.40 | 19,959,274 | 61.5 | 12.3 |
| liver | F0624FS | 25.23 | 18,457,429 | 61.4 | 11.3 |
| liver | F1060CT | 31.52 | 23,206,754 | 61.4 | 14.3 |
| liver | F0972CT | 32.80 | 24,202,841 | 61.3 | 14.8 |
| liver | F1007FS | 22.15 | 15,668,490 | 61.0 | 9.6 |
| liver | F0992FS | 19.47 | 13,507,860 | 60.9 | 8.2 |
| liver | F1140FS | 18.50 | 13,600,472 | 61.4 | 8.3 |
| liver | F1150CT | 28.57 | 21,381,068 | 60.5 | 12.9 |
| liver | F1122CT | 32.91 | 24,324,008 | 60.2 | 14.6 |
| Average | - | 28.52 | 20,414,450 | 62.01 | 12.7 |

| **Tissue** | **Sample name** | **Depth**  **(after preprocessing)** | **Number of reads** | **Aligned (%)** | **Number of mapped reads (million)** |
| --- | --- | --- | --- | --- | --- |
| blood | S0935CT | 38.88 | 25,535,375 | 66.6 | 17.0 |
| blood | S1140FS | 20.30 | 15,992,145 | 65.2 | 10.4 |
| blood | S0629CT | 18.83 | 15,577,947 | 65.1 | 10.1 |
| blood | S1006CT | 57.53 | 45,714,172 | 65.1 | 29.8 |
| blood | S0738CT | 53.70 | 62,083,871 | 64.8 | 40.3 |
| blood | S0602CT | 20.86 | 16,584,960 | 64.4 | 10.7 |
| blood | S1102CT | 32.41 | 27,474,070 | 64.4 | 17.7 |
| blood | S1122CT | 8.66 | 8,843,957 | 64.3 | 5.7 |
| blood | S1060CT | 17.68 | 15,397,706 | 64.2 | 9.9 |
| blood | S0827FS | 38.82 | 27,596,240 | 64.0 | 17.7 |
| blood | S0754FS | 33.35 | 30,496,669 | 63.8 | 19.4 |
| blood | S0978FS | 31.99 | 28,909,410 | 63.8 | 18.4 |
| blood | S0972CT | 21.46 | 18,653,325 | 63.7 | 11.9 |
| blood | S0815FS | 30.16 | 27,635,465 | 63.6 | 17.6 |
| blood | S0835CT | 61.54 | 65,837,930 | 63.6 | 41.8 |
| blood | S0920FS | 26.96 | 18,732,039 | 63.5 | 11.9 |
| blood | S1007FS | 29.12 | 27,277,572 | 63.4 | 17.3 |
| blood | S0592FS | 11.57 | 13,291,061 | 63.3 | 8.4 |
| blood | S0992FS | 20.99 | 15,121,362 | 63.1 | 9.5 |
| blood | S0966FS | 9.16 | 10,749,061 | 63.0 | 6.8 |
| blood | S1073FS | 21.66 | 18,590,197 | 63.0 | 11.7 |
| blood | S1150CT | 21.33 | 23,692,395 | 62.8 | 14.9 |
| blood | S0624FS | 10.25 | 12,160,138 | 61.9 | 7.5 |
| Average | - | 27.70 | 24,867,264 | 63.94 | 15.93 |
