# Supplementary material for: Methylome and transcriptome responses to feed stress induced by low-energy diet in liver and blood of laying hens
Source: Research Square preprint supplement (doi:10.21203/rs.3.rs-8711276/v1), 2026-02-23
Supplement: Supplementary file 2 [file 25d4c58f64a553fcba170db4.xlsx]

## Sheet: liver sans pvalInteraction
FS vs CT	gnId	gnName	chr	start	end	strand	gnSimpleBiotype	padj.line	fc.line	lfc.line	padj.FS	fc.FS	lfc.FS
up	FRAGALG000000013493	FRAGALG000000013493	3	64296102	64299383	-	pcg	0	5104.73	12.32	0.0062	659.51	9.37
up	ENSGALG00010028926	ENSGALG00010028926	17	253447	257507	-	pcg	0.7228	0.72	-0.49	0.0311	9.64	3.27
up	ENSGALG00010000525	ENSGALG00010000525	JAENSK010000461.1	43160	49162	-	pcg	0.7163	0.72	-0.48	0.0438	8.07	3.01
up	LOC415988	SUSD3	12	6838159	6862536	-	pcg	0.7006	1.3	0.38	0.0324	5.14	2.36
up	LOC416546	NOXO1	14	6159585	6163784	-	pcg	0.0918	0.46	-1.13	0.0152	4.54	2.18
up	LOC121107551	LOC121107551	25	538369	541725	-	pcg	0	0.12	-3.05	0.0244	3.62	1.85
up	LOC777355	RORC	25	2929341	2937179	-	pcg	0.6785	0.81	-0.3	0.0307	3.31	1.73
up	LOC420922	CTNND2	2	77078699	77702060	+	pcg	0.154	0.59	-0.75	0.0112	3.24	1.7
up	LOC421757	SLC22A16	3	66212854	66246462	+	pcg	0.2517	0.63	-0.66	0.0246	3.17	1.66
up	LOC124417145	LOC124417145	11	18660398	18667710	-	pcg	0.0028	2.6	1.38	0.0217	2.97	1.57
up	LOC414833	CYP2C18	6	17340688	17345965	+	pcg	0	5.71	2.51	0.0053	2.69	1.43
up	LOC552895	ALAS1	12	3121084	3127944	+	pcg	0.1513	1.5	0.59	0.0146	2.47	1.3
up	LOC423118	CPT1A	5	16197964	16234089	-	pcg	0.239	1.35	0.44	0.0053	2.32	1.22
up	LOC426725	AQP11	1	192887038	192900297	-	pcg	0.869	0.95	-0.08	0.0391	1.94	0.96
up	LOC421894	GCLC	3	87865893	87898624	+	pcg	0	1.94	0.95	0.0244	1.72	0.79
up	LOC422473	DCLK2	4	32338205	32415450	+	pcg	0	2.75	1.46	0.0464	1.72	0.78
up	LOC424719	ERICH3	8	29295356	29316993	-	pcg	0.0192	0.68	-0.56	0.0339	1.69	0.75
up	LOC415835	ZFPM1	11	17988120	18017552	+	pcg	0.0269	0.76	-0.4	0.0012	1.66	0.73
up	LOC373947	FDX1	1	179443305	179459985	-	pcg	0	1.76	0.82	0.0029	1.65	0.72
up	LOC100858205	EXT1	2	134868642	135036759	-	pcg	0.4036	1.14	0.18	0.0311	1.5	0.59
up	LOC415937	USP4	12	2995222	3026415	-	pcg	0.1511	0.81	-0.3	0.0422	1.5	0.58
up	LOC421946	FAM84A	3	98263075	98265760	+	pcg	0.5396	0.91	-0.13	0.0339	1.44	0.53
up	ENSGALG00010015243	ENSGALG00010015243	3	64292485	64301257	-	lnc	0	1415.08	10.47	0.0112	201.89	7.66
up	INRAGALG00000103206	INRAGALG00000103206	3	14420561	14425315	+	lnc	0	1768.53	10.79	0.0033	26.07	4.7
up	INRAGALG00000018021	INRAGALG00000018021	25	550250	551389	+	lnc	0	0	-8.58	0.0414	24.83	4.63
up	INRAGALG00000019577	INRAGALG00000019577	25	537891	539633	+	lnc	0	0.01	-7.61	0.0311	24.44	4.61
up	INRAGALG00000022017	INRAGALG00000022017	25	602203	602994	+	lnc	0	0.01	-6.8	0.0117	23.81	4.57
up	INRAGALG00000004853	INRAGALG00000004853	13	17707539	17709456	-	lnc	0.4637	1.67	0.74	0.0001	13.51	3.76
up	LOC112530658	LOC112530658	Z	10460183	10465942	+	lnc	0.557	1.52	0.6	0.0006	11.09	3.47
up	DAVISGALG000005013	DAVISGALG000005013	1	31299932	31301015	+	lnc	0	0.08	-3.7	0.0006	9.97	3.32
up	LOC121109484	LOC121109484	1	45732949	45739307	+	lnc	0.0005	2.76	1.46	0.0048	3.19	1.67
down	LOC423091	TRPM5	5	13171962	13219190	+	pcg	0	25.6	4.68	0	0.06	-4.18
down	LOC121113328	LOC121113328	1	254982	257868	+	pcg	0	0	-8.27	0.0112	0.06	-4.17
down	LOC420210	ATP6V0D2	2	122621702	122639527	+	pcg	0	0.02	-5.65	0.0015	0.07	-3.86
down	LOC112531107	LOC112531107	31	1701036	1703493	-	pcg	0.0094	0.25	-2.02	0.0364	0.18	-2.48
down	LOC395642	DUSP4	4	48873646	48878752	+	pcg	0.2991	0.53	-0.92	0.0422	0.19	-2.39
down	LOC422154	LOC422154	4	1216625	1221793	+	pcg	0	0.07	-3.86	0.0195	0.22	-2.19
down	LOC772218	SLC51AL	1	118270594	118280798	-	pcg	0.0129	0.37	-1.45	0.0186	0.26	-1.97
down	DAVISGALG000020841	DAVISGALG000020841	3	24938910	24939906	+	pcg	0.9445	1.05	0.06	0.0408	0.28	-1.86
down	LOC426049	CTSG	28	1694299	1696379	-	pcg	0.0198	2.31	1.21	0.0112	0.28	-1.83
down	LOC431663	NPR3	Z	10580413	10640719	-	pcg	0.0395	0.5	-1.01	0.0069	0.3	-1.75
down	LOC423090	KCNQ1	5	12837708	13159212	-	pcg	0	3.79	1.92	0.0048	0.32	-1.67
down	LOC395432	FGF10	Z	14505604	14567474	-	pcg	0	0.21	-2.24	0.0019	0.32	-1.66
down	LOC420931	SEMA5A	2	78248305	78580376	+	pcg	0.3762	0.7	-0.51	0.0408	0.35	-1.52
down	LOC100858014	EMILIN1	3	104303674	104308720	+	pcg	0	5.22	2.38	0.0195	0.45	-1.17
down	LOC396534	PAICS	4	64253806	64288832	-	pcg	0.2339	1.41	0.5	0.0464	0.46	-1.12
down	LOC422345	ACSL4	4	13719825	13756143	+	pcg	0.0019	0.49	-1.03	0.0394	0.48	-1.07
down	LOC418563	MAOA	1	111365363	111409148	-	pcg	0.0527	0.63	-0.67	0.0339	0.48	-1.06
down	LOC769654	SNTB2	11	18566824	18572160	+	pcg	0.2522	1.32	0.4	0.0169	0.49	-1.04
down	LOC112533497	LOC112533497	JAENSK010000585.1	17472	20880	-	pcg	0	0.2	-2.29	0.0244	0.51	-0.97
down	LOC395914	XCL1	1	84252158	84256553	+	pcg	0.9308	0.97	-0.04	0.0228	0.51	-0.96
down	LOC417815	SLC16A7	1	32176090	32263603	+	pcg	0	2.4	1.26	0.0459	0.52	-0.95
down	LOC101747860	LOC101747860	31	86682	100164	+	pcg	0.2289	0.81	-0.3	0.0244	0.61	-0.72
down	LOC396190	UBB	15	4527876	4529396	+	pcg	0.8995	1.02	0.04	0.041	0.67	-0.58
down	LOC121107241	LOC121107241	19	273273	276330	-	lnc	0	0	-9.58	0	0.03	-4.94
down	FRAGALG000000041218	FRAGALG000000041218	Z	66718574	66729159	+	lnc	0.0007	0.05	-4.25	0.0159	0.04	-4.61
down	INRAGALG00000007955	INRAGALG00000007955	2	114219936	114227149	-	lnc	0	616.85	9.27	0.0054	0.06	-3.99
down	INRAGALG00000001826	INRAGALG00000001826	1	103815130	103821589	-	lnc	0	0.01	-6.41	0.0096	0.08	-3.74
down	DAVISGALG000039798	DAVISGALG000039798	9	17026512	17027449	+	lnc	0	0.09	-3.42	0.0195	0.13	-2.89
down	INRAGALG00000013066	INRAGALG00000013066	4	69182443	69184247	-	lnc	0.0037	4.25	2.09	0.0029	0.14	-2.84
down	LOC112531236	LOC112531236	JAENSK010000652.1	2532	8135	+	lnc	0	0.06	-4.02	0.0217	0.22	-2.2
down	FRAGALG000000071221	FRAGALG000000071221	4	352043	354423	-	lnc	0.207	1.95	0.96	0.0371	0.23	-2.15
down	INRAGALG00000016428	INRAGALG00000016428	9	1088619	1091285	+	lnc	0	11.89	3.57	0.0169	0.23	-2.09
down	INRAGALG00000019245	INRAGALG00000019245	JAENSK010000409.1	36930	37844	-	lnc	0.7971	1.17	0.22	0.0422	0.28	-1.86
down	INRAGALG00000024259	INRAGALG00000024259	Z	13881320	13907714	-	lnc	0.0987	0.68	-0.55	0	0.28	-1.83
down	LOC101749492	LOC101749492	4	368580	404754	+	lnc	0.067	0.51	-0.96	0.0364	0.34	-1.57
down	LOC100859625	LOC100859625	1	78375020	78387703	-	lnc	0.0222	2.11	1.08	0.0296	0.35	-1.5
down	FRAGALG000000063035	FRAGALG000000063035	4	69197300	69199832	-	lnc	0.3265	1.32	0.4	0.0005	0.36	-1.49
down	LOC112532355	LOC112532355	4	69149547	69182319	-	lnc	0.4388	1.27	0.35	0.0311	0.44	-1.18
down	ENSGALG00010005787	ENSGALG00010005787	2	108142620	108157632	+	lnc	0	0.12	-3.02	0.0296	0.45	-1.15
down	LOC124417373	LOC124417373	23	6181312	6183511	-	lnc	0.4409	0.79	-0.35	0.0394	0.45	-1.15
