# Supplementary material for: Methylome and transcriptome responses to feed stress induced by low-energy diet in liver and blood of laying hens
Source: Research Square preprint supplement (doi:10.21203/rs.3.rs-8711276/v1), 2026-02-23
Supplement: Supplementary file 3 [file b11d16958e2dc2b7fa46ac7b.xlsx]

## Sheet: Feuil1
	Functional term analysis for the 1,164 1-to-1 human ortholog DEG in blood
	source	fold change	Term	adjP	#genes	gene names
	GObp	up	Positive Regulation of Autophagy (GO:0010508)	0.02	15	XBP1;GSK3A;NPRL2;TFEB;SUPT5H;PIK3C2A;WDR24;STK11;LARP1;ATG101;SESN2;ULK1;IKBKG;TRIM65;TRIM23
	reactome	up	TAK1-dependent IKK and NF-kappa-B Activation	0.05	9	LRRC14;NFKBIA;NLRC5;TRAF2;TAB2;IKBKG;TAB1;UBE2V1;NFKBIB
	reactome	up	Unfolded Protein Response (UPR)	0.05	13	XBP1;GSK3A;ATF6B;NFYA;DCTN1;SHC1;GFPT1;WIPI1;EIF2S3;CREB3L4;LMNA;HDGF;CALR
	GObp	down	Cytoplasmic Microtubule Organization (GO:0031122)	0.01	10	DYNC1H1;CLIP1;DLG1;TUBGCP2;CHORDC1;TUBGCP5;KIF21A;SLAIN2;TUBGCP3;WDR73
	GObp	down	'De Novo' Post-Translational Protein Folding (GO:0051084)	0.01	8	ERO1A;HSPA8;DNAJB4;TCP1;CCT8;HSPA2;CCT5;CCT4
	GObp	down	Regulation of Telomerase RNA Localization to Cajal Body (GO:1904872)	0.01	5	EXOSC10;TCP1;CCT8;CCT5;CCT4
	GObp	down	Fatty Acid Catabolic Process (GO:0009062)	0.01	10	ACBD5;ABCD3;BDH2;ACADL;AUH;PCCA;NUDT19;ACAA1;PEX13;DECR1
	GObp	down	post-Golgi Vesicle-Mediated Transport (GO:0006892)	0.01	10	MON2;NUDT19;VPS54;STXBP5;COMMD1;SCAMP1;CCDC93;EXOC2;EXOC1;LLGL2
	GObp	down	Golgi to Plasma Membrane Transport (GO:0006893)	0.02	9	PREPL;STXBP5;COMMD1;CCDC93;BLZF1;EXOC2;OPTN;EXOC1;LLGL2
	reactome	down	Organelle Biogenesis and Maintenance	0.002	27	DYNC1I2;IFT74;TCTN3;TCTN1;CEP250;CCT8;TBL1X;CC2D2A;CCT5;CCT4;OFD1;DYNC1H1;HSP90AA1;MTX2;SCLT1;PRKAB1;LZTFL1;AHI1;IFT22;CREB1;TCP1;MKS1;TFAM;PPARA;EXOC2;CEP89;EXOC1
	reactome	down	Cilium Assembly	0.002	21	OFD1;DYNC1I2;DYNC1H1;HSP90AA1;SCLT1;LZTFL1;AHI1;IFT74;IFT22;TCTN3;TCTN1;TCP1;MKS1;CEP250;CCT8;CC2D2A;EXOC2;CCT5;CEP89;EXOC1;CCT4
	reactome	down	Anchoring of the Basal Body to the Plasma Membrane	0.04	12	OFD1;AHI1;DYNC1I2;DYNC1H1;HSP90AA1;TCTN3;TCTN1;MKS1;SCLT1;CEP250;CC2D2A;CEP89
