# Supplementary material for: Methylome and transcriptome responses to feed stress induced by low-energy diet in liver and blood of laying hens
Source: Research Square preprint supplement (doi:10.21203/rs.3.rs-8711276/v1), 2026-02-23
Supplement: Supplementary file 4 [file f5d9d3898ae94649966a9e3b.xlsx]

## Sheet: bllod sans padj.inter
FS vs CT	gnId	gnName	chr	start	end	strand	gnSimpleBiotype	padj.line	fc.line	lfc.line	padj.FS	fc.FS	lfc.FS
up	LOC124418404	LOC124418404	1	417860	422416	+	pcg	0.0104	11.05	3.47	0.0043	23.53	4.56
up	LOC121107545	LOC121107545	25	2861984	2863352	+	pcg	0	353.39	8.47	0.0107	23.35	4.55
up	ENSGALG00010009772	ENSGALG00010009772	6	625565	628158	+	pcg	0	40.11	5.33	0.0099	13.28	3.73
up	LOC425201	RTN4RL2	5	16567518	16574276	-	pcg	0	8.92	3.16	0.0002	9.87	3.3
up	LOC101750348	LOC101750348	Z	64923685	64927957	+	pcg	0	0	-12.28	0.0443	8.75	3.13
up	LOC428660	GVINP1	3	104792693	104808857	-	pcg	0.5816	1.56	0.64	0.0161	7.54	2.91
up	LOC427564	HAS3	11	18555132	18559819	+	pcg	0.7172	1.2	0.26	0.0001	6.2	2.63
up	LOC395991	LOC395991	12	11847635	11851019	+	pcg	0.7626	1.22	0.29	0.0065	5.87	2.55
up	LOC416012	SLC26A6	12	9232764	9239180	+	pcg	0.4675	1.34	0.42	0	5.5	2.46
up	ENSGALG00010002303	ENSGALG00010002303	16	1487581	1488212	+	pcg	0.4606	0.65	-0.62	0.006	5.46	2.45
up	LOC101752124	MUC4	9	14668477	14684713	+	pcg	0.0447	1.82	0.86	0	5.41	2.44
up	FRAGALG000000055237	FRAGALG000000055237	3	35049328	35051418	-	pcg	0.1339	0.44	-1.2	0.011	4.96	2.31
up	LOC107057454	UFC1	25	2500298	2501283	+	pcg	0.1798	1.9	0.93	0.002	4.9	2.29
up	ENSGALG00010028926	ENSGALG00010028926	17	253447	257507	-	pcg	0.7017	1.27	0.34	0.0143	4.59	2.2
up	LOC414845	CDH3	11	18511388	18517067	+	pcg	0.6234	1.21	0.28	0.0001	4.4	2.14
up	LOC404299	HIST1H2A4	1	48178339	48178887	-	pcg	0.5026	1.54	0.62	0.0358	4.28	2.1
up	LOC112530086	LOC112530086	19	580102	585824	+	pcg	0.2746	1.72	0.78	0.008	4.22	2.08
up	LOC428595	PNLDC1	3	45257402	45268024	-	pcg	0.001	3.69	1.88	0.0019	4.22	2.08
up	LOC430993	C1QL1	27	942292	946951	-	pcg	0.0031	4.37	2.13	0.0172	4.23	2.08
up	LOC770044	CEND1	5	623932	648538	+	pcg	0.3453	1.69	0.76	0.0188	4.15	2.05
up	LOC417245	PAPPA	17	3719359	3895382	+	pcg	0	0.15	-2.77	0.0001	4.11	2.04
up	LOC423759	TMEM150B	6	17695330	17699824	+	pcg	0.6418	1.25	0.32	0.0029	4.02	2.01
up	LOC107050199	LOC107050199	4	90449075	90471861	+	pcg	0.9016	1.05	0.07	0.0001	4.01	2
up	LOC112533340	AMIGO3	12	2543860	2546157	-	pcg	0.9209	1.04	0.06	0.0001	3.93	1.97
up	LOC124417246	LOC124417246	16	1338177	1340830	+	pcg	0.007	4.13	2.05	0.0377	3.83	1.94
up	LOC107052763	LOC107052763	2	125810995	125812296	-	pcg	0	0.12	-3.01	0.0001	3.8	1.93
up	LOC422074	CEP131	18	9895418	9907744	+	pcg	0.7221	0.86	-0.21	0.0008	3.81	1.93
up	LOC374098	KCNIP2	6	23445695	23467132	+	pcg	0	0.24	-2.08	0.0005	3.75	1.91
up	LOC419181	TP53TG5	20	5451133	5459801	+	pcg	0	28.32	4.82	0.0378	3.77	1.91
up	LOC112531163	LOC112531163	31	2083308	2087147	-	pcg	0	8.42	3.07	0.024	3.71	1.89
up	LOC395192	SLURP1	16	2113120	2114626	-	pcg	0	4.03	2.01	0.0006	3.64	1.86
up	LOC101750437	LRFN1	38	20464	26616	+	pcg	0.1011	1.59	0.67	0	3.57	1.84
up	LOC100858314	RUNDC3A	27	2641574	2647360	-	pcg	0	2.99	1.58	0	3.54	1.82
up	ENSGALG00010002321	ENSGALG00010002321	16	1518737	1519624	+	pcg	0.3281	0.58	-0.79	0.0484	3.51	1.81
up	LOC101749031	TIGD5	2	147801675	147804640	+	pcg	0.0004	5.14	2.36	0.0278	3.52	1.81
up	LOC101749651	BORCS6	3	75525410	75527559	+	pcg	0.973	1.01	0.02	0	3.45	1.79
up	LOC107053360	CDK2AP2	5	608096	609181	+	pcg	0.0117	2.1	1.07	0.0002	3.4	1.77
up	LOC395801	IHH	7	21924895	21933614	+	pcg	0.0347	1.89	0.92	0.0002	3.41	1.77
up	LOC428249	DSCAML1	24	5346012	5426602	-	pcg	0.0004	3.29	1.72	0.0022	3.37	1.75
up	LOC121111542	NCBP2AS2	9	12142166	12142789	+	pcg	0.4309	1.43	0.51	0.0125	3.33	1.74
up	LOC776915	F8A3	4	2071577	2072847	+	pcg	0.0007	2.75	1.46	0.0006	3.25	1.7
up	LOC121107589	LOC121107589	25	2319057	2321647	-	pcg	0.6343	0.77	-0.38	0.0468	3.23	1.69
up	LOC121110055	LOC121110055	2	496547	498827	+	pcg	0.0003	2.43	1.28	0	3.23	1.69
up	DAVISGALG000051370	DAVISGALG000051370	23	5260884	5262800	+	pcg	0.9902	1.01	0.01	0.009	3.18	1.67
up	LOC112533563	LENG9L7	16	1420350	1422399	-	pcg	0.006	2.34	1.22	0.0012	3.18	1.67
up	ENSGALG00010003377	ENSGALG00010003377	16	699364	701350	+	pcg	0.1233	1.61	0.69	0.0006	3.16	1.66
up	LOC425353	DYSF	4	90225348	90286904	-	pcg	0.2732	1.42	0.51	0.0008	3.12	1.64
up	LOC107055370	JUND	28	4423543	4425136	+	pcg	0.01	1.82	0.86	0	3.1	1.63
up	LOC121106915	LOC121106915	16	1993377	1996507	+	pcg	0.0178	1.48	0.57	0	3.04	1.61
up	LOC124417514	LOC124417514	Z	44962677	44972303	-	pcg	0.4115	1.45	0.53	0.0234	3.02	1.6
up	LOC121107894	LOC121107894	31	1975856	1977269	-	pcg	0	11.22	3.49	0.006	2.99	1.58
up	LOC107049493	INO80B	4	90605184	90607169	+	pcg	0.6776	1.12	0.17	0	2.97	1.57
up	LOC107055404	SUOX	34	1352722	1356284	+	pcg	0	2.51	1.33	0	2.96	1.57
up	LOC770277	LOC770277	22	1306972	1309434	-	pcg	0.1923	0.6	-0.74	0.014	2.97	1.57
up	LOC395205	NODAL	22	2426550	2428532	-	pcg	0	7.74	2.95	0.0137	2.94	1.56
up	LOC421257	PTK7	3	4571533	4596943	+	pcg	0.8588	1.05	0.07	0	2.95	1.56
up	LOC107054452	LOC107054452	12	5233917	5239354	-	pcg	0.2798	1.55	0.63	0.0198	2.84	1.5
up	LOC768930	RPS28	28	1300552	1301105	-	pcg	0.0006	2.39	1.25	0.0003	2.84	1.5
up	LOC107052491	ZNF467	2	452173	455039	-	pcg	0.0001	3	1.59	0.002	2.81	1.49
up	LOC107052739	RRS1	2	114785343	114786573	+	pcg	0.0759	1.7	0.77	0.002	2.82	1.49
up	LOC121106945	LOC121106945	16	1742227	1744660	+	pcg	0	2.37	1.25	0	2.8	1.49
up	LOC107055390	LOC107055390	38	7686	9039	-	pcg	0.0141	1.61	0.69	0	2.75	1.46
up	DAVISGALG000045880	DAVISGALG000045880	15	591536	594817	+	pcg	0.1523	0.65	-0.63	0.0026	2.72	1.45
up	LOC100858502	FAM131A	9	15613849	15618587	+	pcg	0.1221	1.94	0.95	0.0499	2.7	1.43
up	LOC121106913	LOC121106913	16	1999934	2009545	+	pcg	0.0015	1.65	0.72	0	2.69	1.43
up	LOC419266	C20orf195	20	10097923	10100209	-	pcg	0.0139	2.6	1.38	0.0361	2.7	1.43
up	LOC107050955	LOC107050955	2	149248620	149292270	-	pcg	0.9024	1.03	0.04	0	2.68	1.42
up	LOC107049267	LOC107049267	5	146854	148807	-	pcg	0.0154	2.32	1.22	0.0188	2.66	1.41
up	LOC107049491	MOGS	4	90609746	90612625	-	pcg	0.782	1.09	0.12	0.001	2.62	1.39
up	LOC107050713	HGH1	2	148538393	148566708	-	pcg	0	4.36	2.12	0.0001	2.63	1.39
up	ENSGALG00010006635	ENSGALG00010006635	3	49602645	49609424	+	pcg	0.6199	1.23	0.3	0.0284	2.61	1.38
up	LOC771592	RASL10B	19	4870150	4875745	-	pcg	0	6.08	2.6	0.0021	2.59	1.37
up	DAVISGALG000039032	DAVISGALG000039032	9	1200284	1202926	-	pcg	0.0036	2.18	1.13	0.0026	2.56	1.36
up	LOC100857298	G6PC	27	5082760	5085879	+	pcg	0.4681	1.31	0.38	0.0156	2.57	1.36
up	LOC100857489	CDC6	27	4389777	4393866	+	pcg	0	3.94	1.98	0.0001	2.57	1.36
up	LOC430697	LOC430697	4	11396263	11418176	-	pcg	0.1081	0.54	-0.9	0.0401	2.58	1.36
up	LOC769312	NEMP1	34	1593926	1598734	-	pcg	0.0008	2.02	1.01	0.0001	2.57	1.36
up	LOC107049545	LOC107049545	22	3317094	3317972	-	pcg	0.2166	1.44	0.52	0.0032	2.56	1.35
up	LOC395335	CISH	12	1935317	1942149	-	pcg	0.6411	1.13	0.18	0.0002	2.55	1.35
up	LOC100857207	TMEM127	22	2935210	2937198	-	pcg	0.0001	2.99	1.58	0.0064	2.54	1.34
up	LOC100858130	CBARP	28	3465701	3471148	-	pcg	0.0082	1.59	0.67	0	2.54	1.34
up	LOC112531156	CUNH17orf49	JAENSK010000584.1	68362	75420	-	pcg	0.0276	2.1	1.07	0.0199	2.53	1.34
up	LOC112532567	POLD4	5	136634	137834	-	pcg	0.0011	2.23	1.16	0.0013	2.52	1.33
up	LOC101750777	RASSF1	12	1523953	1528105	-	pcg	0.1884	1.67	0.74	0.0445	2.5	1.32
up	LOC107049906	SKA1	W	434852	438422	+	pcg	0.1958	1.51	0.59	0.0106	2.48	1.31
up	LOC121106922	LOC121106922	16	1782871	1795548	+	pcg	0.889	1.06	0.08	0.0235	2.48	1.31
up	LOC428398	ZBTB47	2	2019589	2039632	+	pcg	0.3481	1.4	0.49	0.0225	2.47	1.31
up	LOC416550	SLC9A3R2	14	6238666	6266655	+	pcg	0.0029	1.71	0.77	0	2.43	1.28
up	DAVISGALG000038363	DAVISGALG000038363	8	20980152	20982476	+	pcg	0.8128	1.1	0.14	0.0264	2.41	1.27
up	LOC415691	BCAR1	11	1993958	1999749	-	pcg	0.6699	0.87	-0.2	0.0052	2.42	1.27
up	LOC421173	LGR6	26	446993	517501	+	pcg	0.001	0.45	-1.16	0.0024	2.4	1.26
up	LOC422149	LPAR4	4	1351955	1365621	+	pcg	0.0424	0.52	-0.95	0.0235	2.39	1.26
up	LOC429104	CDKN2C	8	23631215	23640013	+	pcg	0.0651	1.85	0.89	0.0269	2.39	1.26
up	LOC107056275	LOC107056275	4	90563908	90568803	+	pcg	0.0034	2.06	1.05	0.0028	2.37	1.25
up	LOC426630	AGBL2	5	592481	596046	+	pcg	0.0041	2.08	1.05	0.0041	2.37	1.24
up	LOC428212	RAB42	23	2629669	2631893	-	pcg	0.0013	2.05	1.04	0.001	2.36	1.24
up	DAVISGALG000035472	DAVISGALG000035472	7	7476021	7480342	+	pcg	0.4831	1.29	0.36	0.0272	2.34	1.23
up	LOC419647	CCDC28B	23	5527765	5529606	-	pcg	0	3.91	1.97	0.0188	2.34	1.23
up	LOC107049124	LOC107049124	16	1879835	1882734	+	pcg	0.8201	0.92	-0.12	0.0269	2.31	1.21
up	LOC124417069	LOC124417069	MU179263.1	46542	61660	-	pcg	0.0027	1.65	0.72	0	2.31	1.21
up	LOC423566	DNAAF2	5	57362159	57373038	-	pcg	0	4.12	2.04	0.0443	2.31	1.21
up	LOC428219	EPHA10	23	3959718	3993686	+	pcg	0	5.01	2.33	0.0062	2.31	1.21
up	LOC769410	SPTB	5	534141	553463	+	pcg	0.7916	1.05	0.07	0	2.31	1.21
up	LOC101748744	LOC101748744	4	2392026	2394643	+	pcg	0.6782	1.14	0.19	0.0069	2.29	1.2
up	LOC396532	SLC4A1	27	2649798	2668681	+	pcg	0	2.05	1.04	0	2.29	1.2
up	LOC419385	MEGF6	21	984963	1020644	+	pcg	0.0457	1.81	0.85	0.0171	2.29	1.2
up	LOC424659	PARS2	8	24933749	24935661	-	pcg	0.0011	1.97	0.98	0.0006	2.3	1.2
up	LOC769377	TMEM198	7	21693836	21698426	-	pcg	0.0002	1.73	0.79	0	2.3	1.2
up	LOC100858806	LRRC3C	27	4281218	4288669	-	pcg	0.1381	1.37	0.45	0.0003	2.28	1.19
up	LOC107054381	CELSR3	12	9206582	9231570	+	pcg	0.0028	0.55	-0.87	0.0004	2.28	1.19
up	LOC769039	HES1	9	12619783	12621354	-	pcg	0.0446	1.61	0.69	0.0021	2.28	1.19
up	LOC772263	SCARF2	15	10101771	10114782	-	pcg	0.1176	1.28	0.36	0	2.28	1.19
up	LOC416651	HBAD	14	12115577	12116504	+	pcg	0.312	1.24	0.31	0.0002	2.26	1.18
up	LOC770036	HOGA1	6	23108642	23111078	-	pcg	0.0001	3.22	1.69	0.033	2.26	1.18
up	DAVISGALG000002449	DAVISGALG000002449	Z	51348223	51350763	+	pcg	0	5.34	2.42	0.0376	2.25	1.17
up	LOC100858221	MARVELD1	6	23095293	23097530	-	pcg	0	5.74	2.52	0	2.25	1.17
up	LOC396490	TAGLN	24	5262542	5265319	+	pcg	0.0018	2.32	1.21	0.0125	2.25	1.17
up	LOC100858074	STOX1	6	11529786	11535719	+	pcg	0.0006	0.38	-1.4	0.0229	2.23	1.16
up	LOC112533358	LOC112533358	12	3692516	3693784	-	pcg	0.0001	2.58	1.37	0.0069	2.24	1.16
up	LOC120637956	MHCY15	16	1434598	1730591	-	pcg	0.129	1.42	0.51	0.0018	2.23	1.16
up	LOC416324	ACSL6	13	16265248	16302452	-	pcg	0.1433	0.62	-0.68	0.0328	2.23	1.16
up	LOC428156	FOXS1	20	10403909	10405237	-	pcg	0	4.57	2.19	0.014	2.23	1.16
up	DAVISGALG000029662	DAVISGALG000029662	5	138971	140647	+	pcg	0.169	1.48	0.57	0.0132	2.22	1.15
up	LOC424214	PLCD4	7	22106471	22114147	-	pcg	0	14.51	3.86	0.005	2.21	1.15
up	LOC107050620	LOC107050620	MU179263.1	62506	79666	-	pcg	0.0194	1.59	0.67	0.0003	2.2	1.14
up	LOC420368	LOC420368	2	494950	496858	+	pcg	0.6625	0.93	-0.11	0	2.21	1.14
up	LOC101751192	TIMELESS	34	1503496	1510624	-	pcg	0.0319	1.57	0.65	0.0009	2.19	1.13
up	LOC395605	CHRNB2	25	1958269	1962942	+	pcg	0.0001	2.92	1.54	0.0186	2.19	1.13
up	LOC415908	HYAL2	12	1514282	1516871	-	pcg	0.0064	1.96	0.97	0.0068	2.2	1.13
up	LOC776376	CRPL2	25	2429451	2431016	+	pcg	0	5.42	2.44	0.0018	2.19	1.13
up	LOC423516	SYT16	5	53362382	53406129	-	pcg	0	4.08	2.03	0.0404	2.17	1.12
up	LOC425034	AADAC	9	23149763	23159320	-	pcg	0.0009	0.52	-0.94	0.0007	2.17	1.12
up	LOC107049647	LOC107049647	31	1352692	1365905	+	pcg	0.4223	0.8	-0.32	0.0082	2.16	1.11
up	LOC426737	MAPT	27	2593636	2631185	-	pcg	0.047	1.56	0.64	0.0023	2.15	1.11
up	LOC424873	CEP63	9	3325666	3343627	+	pcg	0.0004	2.6	1.38	0.0221	2.15	1.1
up	LOC100859290	EPN3	18	10948853	10961678	-	pcg	0	2.41	1.27	0	2.13	1.09
up	LOC423469	ANKRD9	5	49156629	49158068	-	pcg	0.0062	1.75	0.8	0.0012	2.13	1.09
up	LOC427957	SLC19A2	1	83910570	83923189	+	pcg	0.0008	0.39	-1.36	0.0307	2.13	1.09
up	LOC431107	TMUB1	2	293553	295683	+	pcg	0.0023	1.35	0.43	0	2.12	1.09
up	LOC100857912	RFX5	25	2693378	2697236	-	pcg	0.4597	0.86	-0.22	0.0004	2.11	1.08
up	LOC100858381	LOC100858381	11	8035494	8048961	-	pcg	0	5.44	2.44	0.0352	2.11	1.08
up	LOC107054424	NDUFAF3	12	11826591	11828891	-	pcg	0.0075	2.09	1.06	0.0263	2.1	1.07
up	LOC425536	ESPL1	34	1188010	1200187	-	pcg	0.7005	0.9	-0.16	0.0092	2.1	1.07
up	LOC428678	ANKRD40	18	10765966	10772632	+	pcg	0.0007	2.19	1.13	0.0077	2.1	1.07
up	LOC107057453	USP21	25	2501691	2504982	+	pcg	0	2.21	1.14	0	2.08	1.06
up	LOC396423	VIL1	7	22157465	22164464	-	pcg	0.0005	0.51	-0.96	0.0011	2.08	1.06
up	LOC416285	MGAT4B	13	13074598	13110807	+	pcg	0	0.35	-1.5	0.0046	2.08	1.06
up	LOC121107650	LOC121107650	1	169346655	169350088	+	pcg	0.0006	2.17	1.12	0.0076	2.07	1.05
up	LOC419821	PLEKHA6	26	1771972	1815220	-	pcg	0	8.5	3.09	0.0355	2.06	1.04
up	LOC422139	ZDHHC9	4	1578382	1588907	+	pcg	0	1.75	0.8	0	2.05	1.04
up	LOC429116	PTGER3	8	28785032	28795733	-	pcg	0.1163	0.77	-0.38	0	2.05	1.04
up	LOC772136	SDCCAG3	17	8496815	8499217	+	pcg	0.57	1.11	0.15	0.0001	2.05	1.04
up	LOC419854	CR2	26	2701458	2722219	+	pcg	0	3.04	1.61	0.0018	2.04	1.03
up	LOC424199	LOC424199	7	21705885	21707791	-	pcg	0.0003	1.63	0.71	0	2.03	1.02
up	LOC424590	UROD	8	20626251	20629654	+	pcg	0	0.38	-1.38	0.0012	2.03	1.02
up	LOC427053	PRUNE1	25	2603489	2606942	+	pcg	0.0006	1.8	0.84	0.0003	2.03	1.02
up	LOC112529973	LOC112529973	17	2202438	2204842	-	pcg	0.8313	0.95	-0.08	0.0055	2.01	1.01
up	LOC415857	DBNDD1	11	18497229	18500179	-	pcg	0.0108	1.84	0.88	0.0145	2.02	1.01
up	LOC427832	SDF2	19	6251783	6254028	-	pcg	0.497	1.22	0.29	0.0242	2.01	1.01
up	DAVISGALG000038941	DAVISGALG000038941	9	1036097	1038676	+	pcg	0.0048	2.09	1.06	0.032	1.99	1
up	LOC101751757	C22orf39	15	685862	686818	-	pcg	0.4263	1.24	0.31	0.0173	2	1
up	LOC112530307	DCAF11	35	255835	286708	-	pcg	0.0015	1.98	0.99	0.0071	2	1
up	LOC419846	DYRK3	26	2552485	2563268	+	pcg	0.8074	1.04	0.06	0	2	1
up	LOC396242	COL9A3	20	8684111	8715865	+	pcg	0.5149	0.89	-0.17	0.0001	1.99	0.99
up	LOC423565	LRR1	5	57351305	57358327	+	pcg	0	3.14	1.65	0.0084	1.99	0.99
up	LOC423848	PPRC1	6	23293182	23305118	-	pcg	0	2.85	1.51	0.0039	1.98	0.99
up	LOC424752	LIMS2	9	996883	1022128	-	pcg	0	0.5	-1.01	0.0001	1.98	0.99
up	LOC431014	TNK2	9	14647452	14667074	+	pcg	0.0001	1.81	0.86	0.0001	1.99	0.99
up	LOC395818	CTSK	25	2550760	2553581	-	pcg	0	7.16	2.84	0.0203	1.97	0.98
up	LOC396224	LMNA	25	319313	338690	-	pcg	0.7955	1.04	0.06	0	1.97	0.98
up	LOC378914	CDKN1A	26	1629435	1638659	+	pcg	0	2.32	1.21	0.0009	1.96	0.97
up	LOC396142	E2F1	20	2516140	2519952	+	pcg	0.0956	1.46	0.54	0.009	1.95	0.97
up	LOC427991	XK	1	113285260	113302700	-	pcg	0	2.31	1.21	0	1.96	0.97
up	LOC448832	MCAM	24	4266882	4274784	+	pcg	0.3268	1.2	0.26	0.0003	1.96	0.97
up	LOC107055382	GADD45GIP1	30	639675	641727	+	pcg	0.2515	1.19	0.25	0	1.95	0.96
up	LOC121106926	LOC121106926	16	1273689	1289326	+	pcg	0.0943	1.42	0.51	0.0052	1.94	0.96
up	LOC124417251	LOC124417251	16	1272069	1335568	+	pcg	0.001	2.35	1.23	0.0399	1.95	0.96
up	LOC416818	DNAH10	15	4877033	4929923	-	pcg	0	0.31	-1.71	0.0145	1.95	0.96
up	LOC396275	P2RY1	9	23074248	23078204	-	pcg	0.0442	1.5	0.58	0.0047	1.93	0.95
up	LOC418004	SLC25A17	1	49964737	49984837	+	pcg	0	3.04	1.6	0.034	1.93	0.95
up	LOC771191	ACBD4	27	980760	992800	+	pcg	0.0004	1.99	1	0.0057	1.92	0.94
up	LOC100859835	CSRNP2	34	2321086	2332832	+	pcg	0.0006	0.44	-1.19	0.0326	1.9	0.93
up	LOC107049850	SCYL1	39	44597	53562	+	pcg	0	2.19	1.13	0.0009	1.9	0.93
up	LOC121106436	LOC121106436	16	1715073	1718095	-	pcg	0.234	1.33	0.41	0.0168	1.91	0.93
up	LOC418149	CCDC77	1	60337183	60349648	+	pcg	0	4.53	2.18	0.0274	1.91	0.93
up	LOC423136	TNKS1BP1	5	16595024	16605890	+	pcg	0	3.09	1.63	0.0076	1.9	0.93
up	LOC431558	UBTD1	6	23114809	23118849	-	pcg	0.0124	1.68	0.75	0.0085	1.9	0.93
up	LOC107050768	LOC107050768	MU179263.1	133318	189823	-	pcg	0.208	1.22	0.28	0.0001	1.9	0.92
up	LOC418139	DENND5B	1	59474621	59584581	+	pcg	0	0.31	-1.69	0.0349	1.89	0.92
up	LOC771410	IGFN1	26	906078	935023	-	pcg	0.0791	1.42	0.5	0.0041	1.9	0.92
up	LOC776802	CBX5	34	768626	773979	+	pcg	0.024	1.59	0.67	0.0075	1.9	0.92
up	LOC100857105	SERPINF2	19	5881544	5889129	+	pcg	0	2.69	1.43	0.0185	1.87	0.91
up	LOC107051238	PPOX	25	2505245	2511276	+	pcg	0.0007	0.53	-0.91	0.0052	1.87	0.91
up	LOC422177	LOC422177	4	1773410	1777734	+	pcg	0.7527	1.06	0.08	0.0003	1.87	0.91
up	LOC431043	TUBB3	11	18489877	18492525	+	pcg	0	2.54	1.34	0.0046	1.88	0.91
up	LOC107054440	H1FX	12	9312120	9313631	-	pcg	0.2492	0.74	-0.43	0.0325	1.86	0.9
up	LOC426773	EIF4EBP1	22	2418905	2423203	+	pcg	0	2.42	1.27	0	1.87	0.9
up	LOC429123	CHST2	9	10336516	10339119	+	pcg	0	2.84	1.5	0	1.86	0.9
up	LOC770053	JTB	25	1850769	1852079	-	pcg	0.0944	1.35	0.43	0.0016	1.86	0.9
up	LOC425454	IGSF9	25	2435536	2446412	+	pcg	0.0073	1.41	0.5	0	1.85	0.89
up	LOC768957	MRPL24	25	1041049	1042933	-	pcg	0	0.52	-0.95	0.0006	1.85	0.89
up	LOC417577	TRAF4	19	6308095	6312361	+	pcg	0.0128	1.53	0.61	0.0016	1.84	0.88
up	LOC427765	MIGA2	17	6059497	6077089	+	pcg	0.5382	0.88	-0.19	0.0062	1.84	0.88
up	LOC101752044	SSH3	5	132396	136357	+	pcg	0.7772	0.94	-0.09	0.0066	1.83	0.87
up	LOC107054333	SPATA2L	11	18412569	18414206	-	pcg	0	1.96	0.97	0.0002	1.83	0.87
up	LOC420389	KLHL40	2	2041570	2051411	-	pcg	0.1083	1.45	0.53	0.0233	1.83	0.87
up	DAVISGALG000050940	DAVISGALG000050940	22	3311043	3314895	+	pcg	0.5258	1.18	0.24	0.0281	1.82	0.86
up	LOC100857945	ATPIF1	23	1917618	1918415	+	pcg	0.8333	1.06	0.08	0.0309	1.82	0.86
up	LOC100857999	PYGO2	25	2017321	2019169	-	pcg	0.0019	1.48	0.57	0	1.82	0.86
up	LOC395421	STAR	22	2436633	2439887	-	pcg	0.0003	0.54	-0.89	0.0037	1.82	0.86
up	LOC417579	FLOT2	19	6349971	6363772	-	pcg	0.0594	1.24	0.31	0	1.82	0.86
up	LOC100857294	IP6K1	12	2550996	2585878	-	pcg	0.0109	1.32	0.4	0	1.8	0.85
up	LOC107049058	CYP2AC2	3	108582562	108591891	+	pcg	0.0805	1.45	0.54	0.0165	1.81	0.85
up	LOC121106934	LOC121106934	16	1327868	1341855	-	pcg	0.0116	1.69	0.76	0.0175	1.81	0.85
up	LOC422089	TMC6	18	10500489	10507556	+	pcg	0	2.93	1.55	0.0002	1.81	0.85
up	LOC424577	LOC424577	8	20104457	20106379	+	pcg	0	1.78	0.83	0	1.8	0.85
up	LOC421170	RABIF	26	559205	560497	+	pcg	0.0708	1.46	0.55	0.0179	1.78	0.84
up	LOC100858903	CS	34	1474059	1480438	-	pcg	0.2385	1.2	0.26	0.0003	1.78	0.83
up	LOC101748842	PARD6A	11	591086	596491	-	pcg	0.0024	1.92	0.94	0.0297	1.78	0.83
up	LOC101752029	THBD	3	3514978	3517527	+	pcg	0	3.46	1.79	0.0484	1.78	0.83
up	LOC107049492	CCDC142	4	90616346	90621082	-	pcg	0.0096	0.55	-0.87	0.0471	1.78	0.83
up	LOC107049494	WBP1	4	90607505	90609568	+	pcg	0	3.51	1.81	0.0222	1.78	0.83
up	LOC107050692	LOC107050692	MU179264.1	84198	107260	+	pcg	0.89	0.98	-0.03	0	1.77	0.83
up	LOC107050985	LOC107050985	JAENSK010000595.1	25877	35350	+	pcg	0.4108	1.13	0.17	0.0001	1.78	0.83
up	LOC121108918	WDR45	MU179279.1	76465	88473	+	pcg	0.0185	1.58	0.66	0.0115	1.78	0.83
up	LOC417273	ALAD	17	2117727	2125088	+	pcg	0	0.35	-1.53	0.0354	1.78	0.83
up	LOC417341	NARF	18	4103064	4118751	-	pcg	0.0999	0.78	-0.37	0.0007	1.77	0.83
up	LOC426617	H2AZ2	22	3300328	3308071	-	pcg	0.6996	1.08	0.11	0.0022	1.78	0.83
up	LOC429269	MKNK2	28	2556702	2565210	+	pcg	0	1.67	0.74	0	1.78	0.83
up	LOC395823	KIF4B	4	1226048	1243239	+	pcg	0.0002	0.48	-1.06	0.0191	1.77	0.82
up	LOC769919	ABHD17A	28	2653348	2660100	+	pcg	0.0393	0.81	-0.31	0	1.77	0.82
up	LOC771724	STK35	20	10106579	10121325	-	pcg	0.2837	1.21	0.28	0.0029	1.76	0.82
up	LOC100858838	PIM1	26	274770	278418	-	pcg	0.1649	1.18	0.24	0	1.76	0.81
up	LOC107049496	LOC107049496	25	1843121	1850477	-	pcg	0.9644	1.01	0.01	0.0016	1.76	0.81
up	LOC415747	C16orf87	11	7413393	7426925	+	pcg	0.0237	1.52	0.61	0.0098	1.75	0.81
up	LOC417558	RILP	19	5825675	5829750	-	pcg	0.0849	1.29	0.37	0.0006	1.75	0.81
up	LOC421448	MAD2L1BP	3	30544221	30547007	-	pcg	0.0039	1.78	0.83	0.0219	1.75	0.81
up	LOC425483	CDC34	28	3100157	3105405	+	pcg	0.0101	0.79	-0.34	0	1.75	0.81
up	LOC425722	ATG9A	7	21847222	21855429	+	pcg	0.1734	1.15	0.2	0	1.75	0.81
up	LOC771657	LOC771657	4	10947455	10953264	-	pcg	0	0.25	-1.98	0.0156	1.75	0.81
up	DAVISGALG000038865	DAVISGALG000038865	9	1184555	1186517	-	pcg	0.0344	0.64	-0.64	0.0261	1.74	0.8
up	LOC395303	SP1	34	1056515	1072469	-	pcg	0.2289	1.14	0.19	0	1.74	0.8
up	LOC415780	LOC415780	11	10381366	10512986	-	pcg	0.0001	2.1	1.07	0.0155	1.74	0.8
up	LOC427803	SPHK1	18	5054718	5063959	-	pcg	0	2.44	1.29	0	1.74	0.8
up	LOC100857683	FNTB	5	521822	525490	-	pcg	0.2749	0.83	-0.26	0.0021	1.73	0.79
up	LOC101747860	LOC101747860	31	86682	100164	+	pcg	0.0886	1.44	0.53	0.0297	1.73	0.79
up	LOC107052850	LOC107052850	3	4567461	4571188	+	pcg	0.1311	1.42	0.5	0.0447	1.73	0.79
up	LOC373942	AGMAT	21	4903995	4906334	+	pcg	0.0015	1.87	0.9	0.0237	1.73	0.79
up	LOC415653	RANBP10	11	820877	875730	-	pcg	0.0059	0.68	-0.56	0.0006	1.73	0.79
up	LOC416029	CHCHD6	12	9950107	10051933	+	pcg	0	0.52	-0.95	0.0016	1.72	0.79
up	LOC417035	BG8	16	2011680	2018275	+	pcg	0.1144	0.74	-0.44	0.0132	1.73	0.79
up	LOC100857442	LYSMD1	25	2630291	2632008	-	pcg	0	3.17	1.66	0.033	1.71	0.78
up	LOC100859531	BTN3A3L2	16	2019179	2039828	+	pcg	0.8679	1.03	0.05	0.0054	1.71	0.78
up	LOC121108941	LOC121108941	JAENSK010000622.1	26	12434	+	pcg	0.0403	1.31	0.39	0.0002	1.72	0.78
up	LOC416030	PLXNA1	12	10072334	10170333	+	pcg	0	0.12	-3.04	0.0121	1.72	0.78
up	LOC416661	UBALD1	14	12405153	12410888	+	pcg	0.0039	1.33	0.42	0	1.72	0.78
up	LOC427665	LOC427665	14	5115851	5119602	+	pcg	0.378	0.85	-0.24	0.0063	1.72	0.78
up	LOC100857182	MOB3A	28	2550671	2554543	+	pcg	0	2.18	1.13	0	1.71	0.77
up	LOC100857260	PEAK1	10	3024014	3116280	+	pcg	0	0.4	-1.33	0.0273	1.71	0.77
up	LOC121108974	LOC121108974	JAENSK010000667.1	339	8027	+	pcg	0.0391	0.69	-0.54	0.0128	1.7	0.77
up	LOC417049	BRD2	16	2194804	2203763	-	pcg	0.0001	1.57	0.65	0.0001	1.71	0.77
up	LOC421989	ZNF513	3	104268223	104272831	+	pcg	0.0047	1.39	0.48	0	1.71	0.77
up	LOC429757	TMEM115	12	1542441	1545293	-	pcg	0.1953	0.87	-0.19	0	1.7	0.77
up	LOC429810	RCC1	23	2513962	2521247	+	pcg	0.5915	1.09	0.13	0.0009	1.7	0.77
up	LOC100858933	CNPY2	34	1481162	1483277	-	pcg	0.0144	1.56	0.64	0.0145	1.7	0.76
up	LOC101749609	EVA1B	23	4414846	4419765	+	pcg	0.5826	1.12	0.16	0.0131	1.69	0.76
up	LOC395596	EPAS1	3	26202113	26321576	+	pcg	0.0696	0.79	-0.35	0.0003	1.69	0.76
up	LOC415327	PATL2	10	1349710	1355609	-	pcg	0.7742	1.07	0.1	0.0278	1.7	0.76
up	LOC424615	MOB3C	8	21516088	21530481	-	pcg	0.1676	0.79	-0.35	0.007	1.69	0.76
up	LOC426457	USP36	18	10403538	10411874	+	pcg	0.6556	1.1	0.14	0.0129	1.7	0.76
up	LOC770100	TRIM47	18	5255687	5264032	+	pcg	0	4.06	2.02	0.0011	1.7	0.76
up	LOC770752	PLPP5	22	2456736	2464336	-	pcg	0.0041	0.74	-0.42	0	1.7	0.76
up	LOC101750705	ADRB1	6	28443275	28445814	+	pcg	0.8327	1.03	0.05	0.0002	1.68	0.75
up	LOC107049208	YIF1B	38	441889	446529	+	pcg	0.0096	1.47	0.55	0.0022	1.68	0.75
up	LOC121108920	IKBKG	JAENSK010000595.1	677	12673	+	pcg	0	2.2	1.14	0.0037	1.68	0.75
up	LOC419533	LOXL2	22	1260728	1299046	+	pcg	0.0029	0.54	-0.89	0.0435	1.69	0.75
up	LOC420019	CNTD1	27	5049959	5054614	+	pcg	0	2.73	1.45	0.0204	1.69	0.75
up	LOC420776	BLVRA	2	51587009	51627780	+	pcg	0	0.31	-1.69	0.0298	1.68	0.75
up	LOC421171	SKIV2L	26	536532	547318	+	pcg	0.6712	0.93	-0.1	0.0008	1.69	0.75
up	LOC100049617	FAAP100	18	9809919	9816682	+	pcg	0.5809	1.1	0.14	0.0049	1.67	0.74
up	LOC101747801	IKZF4	34	1356967	1369664	+	pcg	0	2.29	1.19	0.0125	1.67	0.74
up	LOC101752154	EHBP1L1	39	106323	116558	-	pcg	0	2.24	1.16	0.0051	1.67	0.74
up	LOC107054985	ADD2	22	3375686	3395762	+	pcg	0	1.61	0.69	0	1.67	0.74
up	LOC395182	ST6GALNAC4	17	5544398	5547177	+	pcg	0.0065	1.73	0.79	0.0404	1.67	0.74
up	LOC415929	MON1A	12	2754321	2759079	-	pcg	0.0024	1.44	0.53	0.0002	1.67	0.74
up	LOC416800	ULK1	15	2651560	2741875	-	pcg	0.0102	0.79	-0.34	0	1.67	0.74
up	LOC425706	CNNM4	22	2980937	2988487	-	pcg	0.3437	1.13	0.17	0	1.67	0.74
up	LOC770462	PAK4	38	28696	48300	-	pcg	0.0563	1.34	0.43	0.0036	1.66	0.74
up	LOC107057640	FBXO46	38	549499	553126	-	pcg	0	1.99	0.99	0	1.66	0.73
up	LOC121108154	KAT8	36	179417	221067	-	pcg	0	2.3	1.2	0.001	1.66	0.73
up	LOC416406	WDR24	14	13159108	13167090	-	pcg	0.5915	0.94	-0.09	0	1.65	0.73
up	LOC416497	NATD1	14	4523301	4529560	+	pcg	0	3.39	1.76	0.0019	1.66	0.73
up	LOC416652	HBA1	14	12118602	12119420	+	pcg	0.1011	1.29	0.36	0.003	1.66	0.73
up	LOC420231	CCNE2	2	125964197	125987037	-	pcg	0.5146	0.9	-0.16	0.0032	1.65	0.73
up	LOC426098	GATAD2B	25	1810358	1839972	+	pcg	0.0254	1.27	0.35	0	1.66	0.73
up	LOC426226	GSE1	11	17283659	17353006	-	pcg	0.0012	1.47	0.56	0.0002	1.66	0.73
up	LOC431225	DNTTIP1	20	10845998	10850119	+	pcg	0.034	1.34	0.43	0.0013	1.66	0.73
up	LOC107049465	UBE2M	31	1326121	1332028	-	pcg	0.0165	1.35	0.43	0.0003	1.65	0.72
up	LOC419077	SMPD1	1	196123261	196127104	+	pcg	0	1.98	0.99	0.0122	1.65	0.72
up	LOC421538	TAF5L	3	39754305	39772005	-	pcg	0.9643	0.99	-0.01	0	1.65	0.72
up	LOC107050147	LOC107050147	27	2785227	2794873	-	pcg	0	1.85	0.89	0.0017	1.63	0.71
up	LOC373980	LAMB2	12	11743732	11752857	+	pcg	0.2994	0.82	-0.28	0.0191	1.63	0.71
up	LOC396191	TFRC	9	14630834	14645573	+	pcg	0.2638	1.19	0.25	0.0034	1.64	0.71
up	LOC396363	TPT1	1	167645081	167649009	-	pcg	0.0989	0.81	-0.31	0.0005	1.64	0.71
up	LOC417544	CHCHD2	19	5390340	5392501	-	pcg	0.0136	1.49	0.58	0.0106	1.63	0.71
up	LOC423849	PROM1L	6	23324613	23331628	+	pcg	0	3.12	1.64	0.0251	1.63	0.71
up	LOC769048	SLC25A10	18	10527996	10532961	+	pcg	0.0487	1.49	0.58	0.0453	1.63	0.71
up	LOC100529061	RAB5B	34	1348033	1353159	+	pcg	0.0029	1.43	0.52	0.0005	1.62	0.7
up	LOC101750157	IPO4	35	508409	530903	+	pcg	0	2.23	1.15	0.0177	1.63	0.7
up	LOC112530986	GIPC1	30	356538	362989	-	pcg	0.2895	1.17	0.23	0.0021	1.62	0.7
up	LOC396103	SRF	3	4599812	4609482	+	pcg	0.419	1.13	0.17	0.0013	1.62	0.7
up	LOC396122	B4GALT2	8	20058796	20069110	+	pcg	0.0035	1.31	0.39	0	1.62	0.7
up	LOC396311	ANK1	22	2784672	2834497	-	pcg	0.0041	0.7	-0.52	0.0008	1.62	0.7
up	LOC415935	FANCD2	12	2943463	2989540	-	pcg	0	0.39	-1.36	0.0168	1.62	0.7
up	LOC422100	SPATA20	18	10939875	10948743	-	pcg	0.0002	1.52	0.61	0.0002	1.62	0.7
up	LOC425660	VPS72	25	2638846	2641139	-	pcg	0.7781	0.94	-0.09	0.0208	1.63	0.7
up	LOC100857219	UQCC3	JAENSK010000484.1	5342	8348	+	pcg	0	1.8	0.84	0.0064	1.61	0.69
up	LOC100858419	NFKBIB	38	52619	55053	-	pcg	0	1.94	0.95	0.0014	1.62	0.69
up	LOC100859444	GPATCH4	25	424187	428622	+	pcg	0.0475	0.69	-0.54	0.0318	1.62	0.69
up	LOC107056441	CORO1B	5	176825	183206	-	pcg	0.0271	1.4	0.49	0.0075	1.61	0.69
up	LOC121106932	LOC121106932	16	2360978	2384376	+	pcg	0	2.24	1.16	0.0002	1.61	0.69
up	LOC124417571	LOC124417571	MU179264.1	107035	108788	-	pcg	0.4859	1.13	0.17	0.0068	1.61	0.69
up	LOC374074	HIRA	15	654741	682581	-	pcg	0.9866	1	0	0.0016	1.61	0.69
up	LOC395135	NUF2	8	5457296	5469104	-	pcg	0.1644	1.29	0.37	0.0234	1.61	0.69
up	LOC395579	KCNN2	Z	73802691	73876760	-	pcg	0.0001	2.03	1.02	0.0438	1.61	0.69
up	LOC396003	PSMB5	35	375586	391775	+	pcg	0.0004	1.44	0.53	0	1.61	0.69
up	LOC396093	NFKBIA	5	35701640	35705164	-	pcg	0.0011	1.63	0.71	0.0078	1.61	0.69
up	LOC415537	IGDCC4	10	17959624	18036398	-	pcg	0.9627	1.01	0.02	0.0283	1.61	0.69
up	LOC419461	FBXO42	21	4327823	4367288	-	pcg	0.0005	1.34	0.42	0	1.61	0.69
up	LOC421377	SLC30A1	3	21882587	21890980	+	pcg	0.0001	1.67	0.74	0.0029	1.62	0.69
up	LOC422072	TEPSIN	18	9890981	9895170	+	pcg	0.4326	0.9	-0.16	0.0007	1.62	0.69
up	LOC769112	CHPF	7	21700236	21704581	+	pcg	0.0049	1.46	0.55	0.0025	1.61	0.69
up	FRAGALG000000023054	FRAGALG000000023054	16	1233387	1234532	-	pcg	0.1586	1.28	0.35	0.0149	1.61	0.69
up	LOC100857754	CTDSP1	7	22164827	22169370	-	pcg	0	3.83	1.94	0.0016	1.6	0.68
up	LOC396485	HBBA	1	196004356	196005887	-	pcg	0.6756	1.07	0.1	0.0027	1.6	0.68
up	LOC396547	NAGA	1	49466797	49471081	+	pcg	0.319	0.82	-0.29	0.0368	1.6	0.68
up	LOC417044	RACK1	16	2146817	2150260	-	pcg	0.0234	1.32	0.4	0.0008	1.59	0.67
up	LOC419597	TRNAU1AP	23	2914310	2934615	-	pcg	0.0691	1.31	0.39	0.0067	1.59	0.67
up	LOC421851	SH3BGRL2	3	79036667	79096708	-	pcg	0.144	0.79	-0.35	0.0124	1.59	0.67
up	LOC427062	SLC7A4	15	10082257	10087371	-	pcg	0	0.56	-0.83	0.0018	1.59	0.67
up	LOC768861	DNAH17	18	10427012	10455821	+	pcg	0.6621	0.94	-0.09	0.0006	1.59	0.67
up	LOC100858732	STAT2	34	1496415	1501912	-	pcg	0.5595	0.92	-0.12	0.0018	1.58	0.66
up	LOC423760	PSD	6	17708210	17743565	-	pcg	0	0.48	-1.05	0.0115	1.59	0.66
up	LOC426299	MXD1	22	3399627	3407187	+	pcg	0.7944	0.97	-0.05	0.0002	1.58	0.66
up	LOC426429	OGDH	22	4462325	4483138	+	pcg	0.0961	1.31	0.39	0.0137	1.58	0.66
up	LOC427898	FAM109B	1	49461543	49466744	-	pcg	0.0201	0.74	-0.44	0.002	1.59	0.66
up	LOC100859100	MHCY35	16	1806168	1809152	+	pcg	0	2.09	1.07	0.0264	1.57	0.65
up	LOC121109775	LOC121109775	2	149346411	149507288	+	pcg	0.1034	0.75	-0.41	0.0262	1.57	0.65
up	LOC395835	RPLP0	15	9441618	9444277	+	pcg	0.9475	1.01	0.02	0.0017	1.57	0.65
up	LOC395934	SHC1	25	2019483	2029642	-	pcg	0.1444	0.88	-0.18	0	1.57	0.65
up	LOC417677	XAF1	19	10054452	10260036	-	pcg	0	2.82	1.5	0.0175	1.57	0.65
up	LOC418597	EIF2S3	1	118334552	118347577	-	pcg	0.6603	0.92	-0.11	0.0139	1.57	0.65
up	LOC424369	UHMK1	8	3827703	3840904	-	pcg	0.0086	0.73	-0.46	0.0012	1.57	0.65
up	LOC424658	CDCP2	8	24831482	24840821	-	pcg	0.0716	0.74	-0.43	0.0191	1.57	0.65
up	LOC426017	DAGLA	5	340413	397565	+	pcg	0.7167	1.06	0.08	0.0024	1.57	0.65
up	LOC426778	WHSC1L1	22	2459564	2495630	-	pcg	0.0001	0.69	-0.54	0	1.57	0.65
up	LOC427072	SLC25A39	27	2636583	2641362	+	pcg	0.0131	1.39	0.47	0.0029	1.57	0.65
up	LOC771342	FAM124B	9	8062084	8064692	-	pcg	0	0.25	-1.99	0.0476	1.57	0.65
up	LOC100857158	PPP1R15B	26	1819370	1826638	-	pcg	0.7394	1.04	0.05	0	1.56	0.64
up	LOC101747779	BAZ2A	34	1524543	1539032	-	pcg	0.0036	1.3	0.38	0	1.55	0.64
up	LOC101748569	LOC101748569	1	194116555	194150294	+	pcg	0.0113	1.54	0.63	0.033	1.56	0.64
up	LOC101749097	SCAMP3	25	2092691	2097100	-	pcg	0.6918	1.06	0.08	0.0009	1.56	0.64
up	LOC395952	LDB1	6	23304649	23323818	+	pcg	0	1.63	0.71	0	1.55	0.64
up	LOC415645	CETP	11	604343	609993	+	pcg	0.1825	1.28	0.35	0.037	1.55	0.64
up	LOC417998	CHADL	1	49792638	49796947	+	pcg	0.6988	1.06	0.09	0.0033	1.56	0.64
up	LOC419686	GALE	23	5955468	5958542	-	pcg	0	0.49	-1.03	0.0072	1.56	0.64
up	LOC424899	CPN2	9	12599080	12601382	+	pcg	0.5654	0.91	-0.13	0.0059	1.56	0.64
up	LOC426566	PATL1	5	192987	198338	-	pcg	0.9146	0.98	-0.02	0.0004	1.56	0.64
up	LOC428689	2002-03-01	4	1529821	1533097	-	pcg	0.6793	1.07	0.1	0.0106	1.56	0.64
up	LOC770162	CIB1	10	20071774	20074266	-	pcg	0.0013	1.66	0.73	0.022	1.56	0.64
up	LOC770755	SMDT1	1	49459975	49461413	-	pcg	0.0002	1.84	0.88	0.0318	1.56	0.64
up	LOC100857186	LAMTOR1	1	194064693	194070788	-	pcg	0.0007	1.37	0.46	0	1.55	0.63
up	LOC100857859	LOC100857859	35	368182	374347	+	pcg	0.3741	1.19	0.25	0.0478	1.55	0.63
up	LOC100858676	MAX	5	518562	521832	+	pcg	0.0387	1.3	0.38	0.0029	1.54	0.63
up	LOC396371	YBX3	1	78386950	78411520	+	pcg	0.2395	0.86	-0.22	0.0022	1.55	0.63
up	LOC419814	KCTD20	26	1580811	1599998	+	pcg	0.0001	0.64	-0.65	0.0012	1.54	0.63
up	LOC421182	BRPF3	26	229992	252455	+	pcg	0.9474	0.99	-0.02	0.009	1.55	0.63
up	LOC770563	R3HDM4	28	3277962	3282970	-	pcg	0.0001	1.64	0.71	0.0048	1.55	0.63
up	LOC101748852	CCDC97	38	285846	290206	-	pcg	0	1.9	0.92	0.0123	1.54	0.62
up	LOC101749950	BICRA	38	207513	226683	+	pcg	0.3565	0.88	-0.19	0.0042	1.54	0.62
up	LOC415748	MYLK3	11	7435242	7466329	+	pcg	0	2.78	1.48	0.007	1.54	0.62
up	LOC416859	LRRC43	15	5802084	5809212	+	pcg	0.0207	0.69	-0.53	0.0234	1.54	0.62
up	LOC420099	MED16	28	3267207	3276214	-	pcg	0.4544	0.9	-0.15	0.0019	1.54	0.62
up	LOC422168	HEPH	4	253654	277623	+	pcg	0.6012	0.91	-0.13	0.0168	1.54	0.62
up	LOC422912	IMMT	4	84991534	85004412	-	pcg	0.5537	0.91	-0.14	0.0084	1.54	0.62
up	LOC425033	MBNL1	9	23087600	23135586	-	pcg	0.3989	0.92	-0.11	0	1.53	0.62
up	LOC430997	PABPC1	2	128180399	128195052	-	pcg	0.3274	0.9	-0.15	0.0001	1.53	0.62
up	LOC769452	DEF8	11	18493165	18496904	+	pcg	0.8776	1.03	0.05	0.0454	1.54	0.62
up	LOC100859241	RAD23A	30	640988	644250	-	pcg	0	1.71	0.77	0.0059	1.52	0.61
up	LOC395819	PRELID1	13	9812879	9814674	-	pcg	0	1.73	0.79	0.0048	1.52	0.61
up	LOC419707	ESAM	24	343694	350760	+	pcg	0.5041	0.92	-0.12	0.0011	1.52	0.61
up	LOC768712	TBC1D16	18	10198280	10223672	+	pcg	0.1949	0.85	-0.23	0.0018	1.53	0.61
up	LOC771559	SCARF1	19	5819858	5824944	-	pcg	0.3846	1.18	0.24	0.0433	1.53	0.61
up	LOC100859351	PRICKLE4	26	5008062	5014325	+	pcg	0	1.83	0.88	0.0056	1.52	0.6
up	LOC101748977	KLHL12	26	547586	558921	+	pcg	0.8909	1.02	0.03	0.0054	1.51	0.6
up	LOC101749138	LOC101749138	2	433873	442916	-	pcg	0.185	0.85	-0.23	0.0015	1.51	0.6
up	LOC101750875	INTS5	MU179272.1	295666	311910	+	pcg	0	2.01	1.01	0.0065	1.51	0.6
up	LOC107050083	LOC107050083	4	90438410	90444925	+	pcg	0.0009	1.65	0.73	0.0265	1.52	0.6
up	LOC396084	ACTG2	22	3101399	3104053	+	pcg	0.286	1.19	0.25	0.0196	1.52	0.6
up	LOC415666	RLTPR	11	1161215	1178679	+	pcg	0.2158	1.21	0.28	0.0192	1.51	0.6
up	LOC416754	AMDHD2	14	13890918	13898041	-	pcg	0	1.62	0.69	0.0032	1.51	0.6
up	LOC421156	TMEM183A	26	959857	971510	-	pcg	0.9803	1	0	0.0001	1.51	0.6
up	LOC421181	TBC1D22B	26	253439	269669	-	pcg	0.0532	1.2	0.26	0	1.51	0.6
up	LOC423023	VPS37C	5	252206	256019	-	pcg	0	1.86	0.9	0.0005	1.52	0.6
up	LOC425290	MORN4	6	23106078	23108552	+	pcg	0.0074	1.55	0.63	0.0387	1.52	0.6
up	LOC425431	LOC425431	25	1021760	1027097	+	pcg	0.0347	1.3	0.38	0.0033	1.51	0.6
up	LOC428687	BCORL1	4	1546175	1567561	-	pcg	0.0857	0.84	-0.24	0.0001	1.52	0.6
up	LOC770246	AP2M1	9	15516699	15539370	+	pcg	0.1765	0.86	-0.22	0.0008	1.51	0.6
up	LOC776094	THAP8	31	1367883	1372100	+	pcg	0	1.85	0.89	0.0261	1.52	0.6
up	LOC100859000	USP39	JAENSK010000605.1	1861	13339	+	pcg	0.0182	1.38	0.46	0.0098	1.51	0.59
up	LOC107049101	B4GALT3	25	2511161	2515080	-	pcg	0.1698	1.27	0.34	0.0418	1.5	0.59
up	LOC107049451	TMEM223	JAENSK010000484.1	29963	33256	-	pcg	0.6792	1.08	0.11	0.0235	1.51	0.59
up	LOC374026	ARNT	25	2554480	2575173	-	pcg	0.0308	1.22	0.28	0	1.5	0.59
up	LOC395650	PHOSPHO1	27	3235627	3242409	+	pcg	0.4736	0.93	-0.11	0.0001	1.51	0.59
up	LOC396501	GJC3	27	890768	903741	-	pcg	0.0007	0.59	-0.77	0.0415	1.5	0.59
up	LOC417669	NLK	19	9742747	9782820	+	pcg	0.1986	1.2	0.26	0.0089	1.5	0.59
up	LOC422513	LOC422513	4	34603576	34622249	+	pcg	0.0097	0.68	-0.56	0.0235	1.5	0.59
up	LOC423361	ACYP1	5	37659749	37660704	-	pcg	0.0355	0.82	-0.28	0	1.51	0.59
up	LOC423839	ZFYVE27	6	23088251	23093488	-	pcg	0.0347	0.72	-0.47	0.0282	1.5	0.59
up	LOC426135	CASC3	27	4360690	4369978	+	pcg	0	1.52	0.6	0	1.51	0.59
up	LOC428703	FOXO4	4	2357745	2374543	-	pcg	0.4877	0.94	-0.1	0	1.5	0.59
up	LOC429172	PAN2	34	1483452	1493643	-	pcg	0.0009	0.7	-0.52	0.0016	1.5	0.59
up	LOC429983	PIP5K1A	25	2641508	2657840	+	pcg	0.0406	0.79	-0.35	0.0021	1.51	0.59
up	LOC768421	HK3	13	9932079	9937336	+	pcg	0	2.02	1.01	0.0397	1.5	0.59
up	LOC771069	LOC771069	21	2220271	2228325	+	pcg	0	0.53	-0.92	0.013	1.51	0.59
up	LOC776936	HDGF	25	1042667	1048083	-	pcg	0.2356	0.85	-0.23	0.0048	1.51	0.59
up	LOC121108729	LOC121108729	MU179264.1	107629	135081	-	pcg	0.0162	1.35	0.43	0.005	1.5	0.58
up	LOC374044	HK2	22	3335898	3359577	-	pcg	0	1.72	0.78	0.0007	1.49	0.58
up	LOC395270	MOCS1	3	28380021	28410829	+	pcg	0.0497	0.83	-0.26	0.0001	1.49	0.58
up	LOC403121	IFI27L2	23	4701712	4705881	+	pcg	0	2.58	1.37	0.0033	1.5	0.58
up	LOC415528	PDCD7	10	17768121	17772125	+	pcg	0.0001	1.68	0.75	0.0152	1.49	0.58
up	LOC420123	FKBP8	28	4336845	4343013	+	pcg	0.8484	0.98	-0.04	0.0006	1.49	0.58
up	LOC421234	CD248	3	3506467	3509050	+	pcg	0.0025	1.48	0.57	0.0106	1.49	0.58
up	LOC422296	TMLHE	4	10954292	10974452	-	pcg	0	0.28	-1.84	0.0074	1.49	0.58
up	LOC422343	AMMECR1	4	13550164	13650621	+	pcg	0.8684	1.03	0.04	0.0149	1.5	0.58
up	LOC426468	RNF41	34	1430219	1439344	-	pcg	0.0269	1.26	0.33	0.0005	1.49	0.58
up	LOC429847	MAP1S	28	3748861	3757577	+	pcg	0.1681	1.17	0.23	0.0014	1.49	0.58
up	LOC430337	ENTPD7	6	22896911	22901842	-	pcg	0.8157	1.05	0.07	0.044	1.49	0.58
up	LOC769661	ATF7	34	968527	1015052	+	pcg	0.0534	0.8	-0.32	0.0017	1.49	0.58
up	LOC769684	GCOG8	11	18576216	18581232	-	pcg	0.3958	1.12	0.16	0.0034	1.49	0.58
up	LOC771898	WIPF2	27	4377243	4389272	+	pcg	0	1.83	0.87	0.0002	1.5	0.58
up	LOC772114	AGPAT2	17	8343637	8351623	+	pcg	0.7436	1.04	0.06	0.0007	1.5	0.58
up	LOC100857228	ZNF628	31	80455	86547	+	pcg	0.0004	1.58	0.66	0.0129	1.49	0.57
up	LOC100857770	RPS26	34	1371694	1373116	+	pcg	0.5707	0.92	-0.12	0.0063	1.48	0.57
up	LOC395181	RPSAP58	2	44265918	44270608	-	pcg	0.0029	1.49	0.57	0.014	1.49	0.57
up	LOC415835	ZFPM1	11	17988120	18017552	+	pcg	0.5192	0.93	-0.1	0.0003	1.48	0.57
up	LOC416918	XBP1	15	7720788	7723912	-	pcg	0.0001	0.61	-0.71	0.0082	1.48	0.57
up	LOC419448	UBE4B	21	3591704	3627673	+	pcg	0	0.63	-0.66	0.0022	1.48	0.57
up	LOC419669	RNF19B	23	5661842	5683283	-	pcg	0.2426	0.87	-0.21	0.0034	1.48	0.57
up	LOC420080	BTBD2	28	2568720	2581542	+	pcg	0	2.91	1.54	0.0133	1.48	0.57
up	LOC422080	RNF213	18	10124583	10171759	-	pcg	0.1643	0.83	-0.28	0.0117	1.48	0.57
up	LOC423842	MMS19	6	23119130	23133206	+	pcg	0.0224	1.23	0.3	0.0001	1.49	0.57
up	LOC100857417	PLVAP	28	3874136	3876588	-	pcg	0.011	1.38	0.47	0.0103	1.48	0.56
up	LOC107054909	RSG1	21	4323992	4327455	-	pcg	0.0075	1.43	0.52	0.0151	1.48	0.56
up	LOC396257	CA2	2	122451344	122467708	+	pcg	0.4088	1.15	0.2	0.0402	1.47	0.56
up	LOC415308	PTPN9	10	2709802	2714786	-	pcg	0.1945	0.84	-0.25	0.0095	1.48	0.56
up	LOC420104	SBNO2	28	3373208	3425929	-	pcg	0.0692	0.86	-0.22	0	1.47	0.56
up	LOC420728	TRANK1	2	45870522	45922624	-	pcg	0.0009	1.46	0.54	0.0035	1.48	0.56
up	LOC423408	RPS6KA5	5	43629286	43762652	-	pcg	0.0012	1.39	0.47	0.0011	1.47	0.56
up	LOC424205	NHEJ1	7	21888508	21921495	+	pcg	0.163	1.2	0.27	0.0093	1.47	0.56
up	LOC429082	FRRS1	8	11838834	11864370	+	pcg	0	0.22	-2.18	0.0335	1.48	0.56
up	LOC770406	FXYD6	24	5434711	5442723	-	pcg	0.7661	0.96	-0.06	0.007	1.48	0.56
up	LOC771901	UCK1	17	6840344	6843883	-	pcg	0.0001	1.46	0.55	0.0008	1.48	0.56
up	LOC395141	HS6ST1	9	1189975	1356304	-	pcg	0	1.66	0.73	0.0057	1.47	0.55
up	LOC396262	RPLP1	2	144622258	144623423	+	pcg	0.4622	0.9	-0.16	0.0161	1.47	0.55
up	LOC416050	TADA3	12	11662282	11665138	-	pcg	0	2.18	1.12	0.0166	1.47	0.55
up	LOC416829	MPHOSPH9	15	5075175	5099717	+	pcg	0.0307	0.72	-0.47	0.0354	1.47	0.55
up	LOC417213	ODF2	17	5785717	5803792	+	pcg	0.4235	1.13	0.17	0.0204	1.46	0.55
up	LOC417463	POM121C	19	841939	852976	-	pcg	0	2.01	1.01	0.0104	1.46	0.55
up	LOC422188	GLA	4	1976299	1983343	+	pcg	0.7278	0.94	-0.09	0.0318	1.47	0.55
up	LOC423418	LGMN	5	44320840	44354568	-	pcg	0.0377	0.76	-0.4	0.0162	1.46	0.55
up	LOC426673	ATP5B	34	1539623	1542570	-	pcg	0.3548	1.1	0.14	0.0003	1.46	0.55
up	LOC427182	JMY	Z	22881024	22944145	-	pcg	0.2057	0.85	-0.24	0.0085	1.47	0.55
up	LOC100858003	TTC31	4	90621068	90625490	+	pcg	0.0001	1.48	0.56	0.0012	1.45	0.54
up	LOC100859849	FAM63A	25	2596555	2603210	-	pcg	0.0017	0.65	-0.63	0.0289	1.46	0.54
up	LOC107050103	LOC107050103	JAENSK010000484.1	48881	68973	-	pcg	0.0781	0.8	-0.32	0.0082	1.46	0.54
up	LOC121108177	LOC121108177	38	640116	641755	-	pcg	0	2.26	1.17	0.0417	1.45	0.54
up	LOC395250	SSBP3	8	24858396	24909605	-	pcg	0	1.48	0.57	0.0004	1.45	0.54
up	LOC395908	OASL	12	3411598	3413627	-	pcg	0	1.74	0.8	0.0222	1.46	0.54
up	LOC416259	SAP30L	13	11747437	11756333	-	pcg	0	0.63	-0.68	0.0007	1.46	0.54
up	LOC416660	MGRN1	14	12355008	12407281	-	pcg	0.7276	0.94	-0.09	0.0309	1.46	0.54
up	LOC417560	WDR81	19	5867517	5880483	+	pcg	0.0016	1.59	0.67	0.0415	1.46	0.54
up	LOC417574	RPL23A	19	6286719	6289117	+	pcg	0.0033	0.7	-0.51	0.0095	1.45	0.54
up	LOC421256	MRPL2	3	4543144	4544986	-	pcg	0	1.99	0.99	0.0397	1.46	0.54
up	LOC423867	WBP1L	6	24122834	24172838	+	pcg	0.0017	1.43	0.52	0.0057	1.46	0.54
up	LOC424368	UAP1	8	3822320	3828363	-	pcg	0.0011	1.59	0.67	0.0346	1.45	0.54
up	LOC768878	ACVR1B	34	166108	183505	-	pcg	0.4762	1.08	0.11	0.0003	1.45	0.54
up	LOC770363	BSG	28	3108186	3119193	+	pcg	0.6735	1.05	0.08	0.0024	1.45	0.54
up	LOC100859723	PI4KB	25	2675763	2692751	-	pcg	0.0804	1.17	0.23	0.0002	1.44	0.53
up	LOC100859827	TSC22D2	9	23364972	23390095	-	pcg	0.9721	1	-0.01	0.0011	1.45	0.53
up	LOC107050474	TRIM28	31	1332394	1342781	-	pcg	0.1216	1.19	0.25	0.0024	1.44	0.53
up	LOC395505	PBX1	8	5204813	5312999	-	pcg	0	0.65	-0.61	0	1.44	0.53
up	LOC419091	UVRAG	1	193919508	194005173	-	pcg	0.0534	1.21	0.28	0.0011	1.44	0.53
up	LOC419803	AHCYL1	26	1333098	1353937	+	pcg	0.3864	0.88	-0.18	0.0208	1.44	0.53
up	LOC423615	NCOA4	6	3453981	3462724	+	pcg	0.1178	0.81	-0.3	0.0139	1.44	0.53
up	LOC426183	ASB8	34	1174361	1177400	-	pcg	0.2095	0.89	-0.17	0.0003	1.44	0.53
up	LOC427417	CREB3L4	Z	9720564	9725532	-	pcg	0	1.9	0.93	0.0001	1.44	0.53
up	LOC100857115	GPX1	12	3029728	3030641	-	pcg	0.9815	1	0	0.001	1.43	0.52
up	LOC100859792	UBTF	27	2667582	2685240	+	pcg	0	1.97	0.98	0.0065	1.44	0.52
up	LOC107049831	MRI1	30	443300	448617	-	pcg	0	1.86	0.89	0.0245	1.44	0.52
up	LOC416401	SPSB3	14	13219057	13227211	+	pcg	0.8028	1.03	0.05	0.0057	1.43	0.52
up	LOC419265	HELZ2	20	10074766	10097361	+	pcg	0	1.94	0.95	0.0248	1.44	0.52
up	LOC419583	YTHDF2	23	2591387	2604434	-	pcg	0.1252	0.83	-0.27	0.0095	1.43	0.52
up	LOC420105	STK11	28	3430150	3465263	+	pcg	0	0.61	-0.71	0.0018	1.43	0.52
up	LOC424836	TSPEAR	9	4840923	4854031	+	pcg	0.0374	0.74	-0.44	0.039	1.44	0.52
up	LOC428969	PGAM1	6	23140926	23143281	-	pcg	0	2.13	1.09	0.0149	1.43	0.52
up	LOC770407	TARS2	25	2267317	2273061	-	pcg	0	3.08	1.62	0.0272	1.44	0.52
up	LOC770970	COQ10A	34	1471993	1475107	+	pcg	0	1.67	0.74	0.0024	1.43	0.52
up	LOC100858513	PTPN23	2	973247	986444	-	pcg	0.5573	0.92	-0.12	0.0135	1.42	0.51
up	LOC107050964	LOC107050964	30	1676	5665	-	pcg	0.001	1.59	0.67	0.0484	1.42	0.51
up	LOC107055138	HAX1	25	1920405	1922269	+	pcg	0.2908	1.13	0.17	0.0031	1.42	0.51
up	LOC418014	TAB1	1	50699403	50707830	-	pcg	0.2717	0.85	-0.23	0.0312	1.42	0.51
up	LOC419872	MOV10	26	3585515	3591486	+	pcg	0.211	1.17	0.22	0.0096	1.42	0.51
up	LOC421990	SNX17	3	104272935	104278458	-	pcg	0.0093	1.37	0.45	0.0154	1.42	0.51
up	LOC425132	NPRL2	12	1536565	1540638	-	pcg	0.004	1.5	0.58	0.0406	1.43	0.51
up	LOC426636	FASTK	2	295989	305462	+	pcg	0	2.07	1.05	0.014	1.42	0.51
up	LOC431601	UHRF2	Z	28361207	28443545	+	pcg	0.0033	0.72	-0.47	0.0065	1.43	0.51
up	LOC770233	SIDT2	24	5254168	5261644	+	pcg	0.0373	1.29	0.36	0.0125	1.43	0.51
up	LOC770336	PRC1	10	20096170	20102685	+	pcg	0.0738	1.26	0.33	0.02	1.42	0.51
up	LOC776992	LOC776992	3	104360184	104366318	-	pcg	0.3848	0.89	-0.17	0.0179	1.43	0.51
up	LOC100526660	EEF1G	MU179272.1	187338	242775	-	pcg	0.0558	1.25	0.32	0.0106	1.42	0.5
up	LOC100859273	LOC100859273	JAENSK010000592.1	23726	40794	-	pcg	0.514	0.92	-0.12	0.0095	1.42	0.5
up	LOC101749776	MCRIP1	18	10545533	10548340	-	pcg	0.4652	0.93	-0.11	0.0008	1.41	0.5
up	LOC107049249	CD63	34	1810588	1813745	+	pcg	0.0496	1.22	0.29	0.0026	1.41	0.5
up	LOC121110037	LRRC14	2	148681830	148687606	+	pcg	0.8143	1.04	0.05	0.0284	1.42	0.5
up	LOC395556	STAT5A	27	4873140	4888437	-	pcg	0.0003	1.42	0.5	0.002	1.42	0.5
up	LOC396342	TEF	1	49701507	49717640	-	pcg	0.65	1.06	0.08	0.004	1.42	0.5
up	LOC416399	NME3	14	13236567	13239842	+	pcg	0.5913	1.08	0.11	0.0173	1.41	0.5
up	LOC416662	CDIP1	14	12416524	12427222	+	pcg	0.7036	1.05	0.07	0.006	1.42	0.5
up	LOC416774	YPEL1	15	573426	588613	+	pcg	0.006	0.75	-0.41	0.0036	1.42	0.5
up	LOC417002	OSBP2	15	10703098	10765510	-	pcg	0.3879	1.08	0.11	0.0002	1.41	0.5
up	LOC417048	TAPBP	16	2188266	2191800	-	pcg	0	1.87	0.9	0.0039	1.41	0.5
up	LOC417358	RHBDF2	18	4984100	4999067	+	pcg	0.0002	0.67	-0.57	0.0083	1.41	0.5
up	LOC417367	TRIM65	18	5251851	5255132	+	pcg	0	2.26	1.18	0.0482	1.41	0.5
up	LOC417774	MDFIC	1	25918015	25967991	-	pcg	0.362	0.88	-0.18	0.0168	1.42	0.5
up	LOC419370	ZBTB48	21	560846	567355	-	pcg	0.0327	1.3	0.38	0.0194	1.41	0.5
up	LOC421449	GTPBP2	3	30548085	30558301	+	pcg	0.0619	0.81	-0.31	0.008	1.42	0.5
up	LOC423653	SLC22A15L	6	8425828	8446041	-	pcg	0.6725	1.06	0.09	0.0147	1.41	0.5
up	LOC424136	HNRNPA1	34	761805	768240	-	pcg	0.4675	1.08	0.11	0.0011	1.41	0.5
up	LOC424581	TMEM53	8	20421656	20424874	-	pcg	0.178	1.22	0.29	0.0494	1.41	0.5
up	LOC426401	KANSL2	34	92407	103977	+	pcg	0.0001	1.55	0.63	0.0131	1.42	0.5
up	LOC426483	RSF1	1	192811708	192870867	+	pcg	0	1.65	0.72	0.0074	1.41	0.5
up	LOC428228	AZIN2	23	5671591	5698507	+	pcg	0	1.98	0.99	0.0273	1.41	0.5
up	LOC107049993	GLTSCR2	38	243372	246886	+	pcg	0.0003	1.41	0.49	0.0025	1.4	0.49
up	LOC417639	MED13	19	7900222	7949820	+	pcg	0.2082	0.85	-0.24	0.0218	1.41	0.49
up	LOC419954	MAP3K3	27	2376381	2415730	+	pcg	0.0029	1.35	0.43	0.0037	1.41	0.49
up	LOC420881	SLC22A23	2	65903278	66002502	+	pcg	0	0.55	-0.87	0.039	1.41	0.49
up	LOC422049	MUT	3	108599713	108619127	+	pcg	0.0003	1.48	0.56	0.0111	1.4	0.49
up	LOC423616	TIMM23B	6	3466058	3482888	-	pcg	0.5199	1.09	0.12	0.0136	1.41	0.49
up	LOC425530	KAT7	27	2907321	2918786	-	pcg	0.0196	1.23	0.3	0.0008	1.4	0.49
up	LOC428650	RSAD2	3	94677178	94685018	+	pcg	0.441	0.9	-0.15	0.0141	1.41	0.49
up	LOC429042	CLASP1	7	25697887	25853233	-	pcg	0.4366	1.09	0.13	0.0032	1.41	0.49
up	LOC430980	GTF3C2	3	104370245	104376524	-	pcg	0.9496	1.01	0.01	0.0161	1.4	0.49
up	ENSGALG00010027146	KXD1	28	4335490	4337350	-	pcg	0.0111	1.39	0.48	0.0346	1.4	0.48
up	LOC100857358	LOC100857358	MU179261.1	10302	139497	+	pcg	0.0351	1.28	0.35	0.0138	1.4	0.48
up	LOC100857413	NLRC5	11	610641	648121	+	pcg	0.0185	1.29	0.36	0.0086	1.39	0.48
up	LOC100857613	MAF1	2	148569674	148590044	-	pcg	0.2537	1.15	0.2	0.0147	1.4	0.48
up	LOC100858796	SESN2	23	2458641	2471105	+	pcg	0	1.83	0.87	0.0113	1.4	0.48
up	LOC101748292	ZC3H4	38	453084	470560	-	pcg	0	1.81	0.86	0.0179	1.39	0.48
up	LOC404531	RBM12	20	1388467	1400101	+	pcg	0.011	1.27	0.35	0.0022	1.4	0.48
up	LOC416509	TOM1L2	14	4927096	4978180	-	pcg	0.339	0.91	-0.13	0.001	1.4	0.48
up	LOC417963	FAM234B	1	48306429	48328270	+	pcg	0.0131	0.76	-0.39	0.0085	1.4	0.48
up	LOC419995	MLLT6	27	3953354	3991215	+	pcg	0.9328	0.99	-0.02	0.0141	1.4	0.48
up	LOC421622	TAB2	3	47710772	47771915	+	pcg	0.0108	0.79	-0.35	0.0024	1.39	0.48
up	LOC421916	TSSC1	3	93252910	93317271	-	pcg	0.7098	0.96	-0.05	0.0006	1.4	0.48
up	LOC422236	PABIR2	4	4025718	4035952	-	pcg	0.053	0.84	-0.25	0.0011	1.39	0.48
up	LOC423707	DNAJB12	6	12153567	12168623	+	pcg	0.4085	0.92	-0.12	0.0011	1.39	0.48
up	LOC425468	RPL9	4	68806054	68811907	+	pcg	0.8162	1.03	0.05	0.0168	1.4	0.48
up	LOC425721	ABCB6	7	21855938	21861415	+	pcg	0	0.53	-0.93	0.0377	1.39	0.48
up	LOC426492	RPLP2	5	15378083	15382818	-	pcg	0.2072	0.84	-0.26	0.045	1.39	0.48
up	LOC429484	PLAG1	2	110930133	110983341	-	pcg	0	0.57	-0.81	0.0222	1.4	0.48
up	LOC430589	C1orf43	25	1893858	1897583	-	pcg	0.0002	1.39	0.47	0.0014	1.39	0.48
up	LOC769492	NDUFS8	5	493280	495088	-	pcg	0.0086	1.37	0.45	0.0193	1.4	0.48
up	LOC100859816	SETDB1	25	2577307	2591422	+	pcg	0.0207	1.23	0.3	0.0013	1.38	0.47
up	LOC107051050	LOC107051050	JAENSK010000642.1	943	35064	+	pcg	0.0057	1.39	0.48	0.0275	1.38	0.47
up	LOC374155	ST8SIA4	Z	51316915	51374621	+	pcg	0	1.84	0.88	0.0168	1.38	0.47
up	LOC395411	ZBTB7A	28	1838854	1852524	+	pcg	0.4139	1.11	0.15	0.0131	1.39	0.47
up	LOC396325	EEF2	28	1878244	1886120	+	pcg	0.0863	1.24	0.32	0.0317	1.38	0.47
up	LOC417015	MTMR3	15	10928494	11002933	-	pcg	0.4092	1.09	0.12	0.0022	1.38	0.47
up	LOC417287	TRAF2	17	1205517	1224558	-	pcg	0	1.62	0.7	0.0016	1.38	0.47
up	LOC418403	NXPE3	1	85632308	85651493	+	pcg	0.578	1.09	0.12	0.0404	1.38	0.47
up	LOC419074	LOC419074	1	196176432	196188895	-	pcg	0.0784	0.84	-0.25	0.0029	1.38	0.47
up	LOC425999	KDM2A	5	87266	121423	+	pcg	0.7114	0.96	-0.05	0.0005	1.39	0.47
up	LOC428658	TMEM214	3	104287824	104293013	+	pcg	0.5124	0.91	-0.13	0.0275	1.39	0.47
up	LOC428984	PDZD8	6	29945216	29995591	-	pcg	0.9879	1	0	0.0018	1.39	0.47
up	DAVISGALG000017556	DAVISGALG000017556	2	97731423	97736757	+	pcg	0	0.61	-0.71	0.0129	1.37	0.46
up	LOC100736561	PANK4	21	1428225	1450062	+	pcg	0	0.69	-0.54	0.0041	1.37	0.46
up	LOC100857323	CDC42SE1	25	2607115	2610431	-	pcg	0	1.7	0.76	0.0295	1.38	0.46
up	LOC101750600	SMG6	19	6011406	6102369	-	pcg	0.5149	0.94	-0.09	0.001	1.38	0.46
up	LOC107057564	LOC107057564	27	3841086	3850887	+	pcg	0.0054	1.34	0.42	0.0112	1.37	0.46
up	LOC416493	PTCD1	14	4391389	4396138	-	pcg	0.1622	1.17	0.23	0.0122	1.38	0.46
up	LOC419656	KPNA6	23	5538331	5554406	-	pcg	0.3318	1.11	0.15	0.0042	1.37	0.46
up	LOC419928	CCND3	26	5071618	5110296	-	pcg	0.5687	1.07	0.1	0.0115	1.38	0.46
up	LOC423068	SOX6	5	10772986	11177732	-	pcg	0.0019	0.75	-0.42	0.0035	1.38	0.46
up	LOC423527	DHRS7	5	54048000	54086631	+	pcg	0	0.35	-1.52	0.0302	1.38	0.46
up	LOC426133	PSMD3	27	4302269	4306004	+	pcg	0.982	1	0	0.0167	1.37	0.46
up	LOC427022	DNAJB2	7	21817365	21823223	-	pcg	0	1.4	0.48	0.001	1.38	0.46
up	LOC770734	PRODH	15	10116657	10125259	-	pcg	0	1.84	0.88	0.007	1.37	0.46
up	LOC100859104	CALR	30	644470	647759	-	pcg	0.9627	0.99	-0.01	0.0437	1.37	0.45
up	LOC100859397	TRIOBP	1	51173130	51188787	-	pcg	0	2.12	1.09	0.0269	1.36	0.45
up	LOC101747888	MTA2	JAENSK010000484.1	112415	120395	+	pcg	0.0001	1.57	0.65	0.0302	1.37	0.45
up	LOC395339	ADCY9	14	12596671	12655880	-	pcg	0.1429	1.15	0.21	0.0045	1.36	0.45
up	LOC416310	TXNDC15	13	15271874	15278257	-	pcg	0.7602	1.05	0.07	0.043	1.37	0.45
up	LOC419563	GBP1	23	1770672	1783952	+	pcg	0.0001	1.45	0.54	0.0057	1.36	0.45
up	LOC420097	MISP	28	3200719	3207134	+	pcg	0	0.67	-0.58	0.0063	1.37	0.45
up	LOC420112	ARMC6	28	4102309	4107427	-	pcg	0.3808	1.1	0.14	0.0095	1.37	0.45
up	LOC422370	NKRF	4	16489978	16501699	+	pcg	0.8738	1.03	0.04	0.0498	1.37	0.45
up	LOC423259	SUSD6	5	27401086	27481892	-	pcg	0.0001	0.72	-0.47	0.0019	1.37	0.45
up	LOC426014	CPSF7	5	298218	304905	-	pcg	0.9328	1.01	0.02	0.024	1.36	0.45
up	LOC426418	DNAJC14	34	1760419	1763103	+	pcg	0.1002	1.19	0.25	0.0107	1.37	0.45
up	LOC426941	MRPL34	28	3846006	3847295	+	pcg	0.2851	1.13	0.18	0.0141	1.37	0.45
up	LOC428248	BUD13	24	5147371	5154892	-	pcg	0.0027	0.74	-0.44	0.0103	1.37	0.45
up	LOC693260	BF1	16	2213458	2216245	+	pcg	0.8579	1.02	0.03	0.0122	1.36	0.45
up	LOC771165	ARRDC2	28	4494311	4500521	-	pcg	0.0003	1.47	0.56	0.0185	1.36	0.45
up	LOC100859568	FAAH2	4	1768182	1773162	+	pcg	0.3118	0.87	-0.19	0.0457	1.35	0.44
up	LOC395457	FURIN	10	20130038	20142558	-	pcg	0.0042	1.28	0.36	0.0026	1.36	0.44
up	LOC420611	FAM126A	2	30803698	30841306	-	pcg	0	0.46	-1.11	0.0446	1.35	0.44
up	LOC423070	PIK3C2A	5	11369494	11435067	-	pcg	0.5044	1.09	0.12	0.025	1.35	0.44
up	LOC430442	PGLS	30	697693	701082	+	pcg	0.0003	1.42	0.51	0.0109	1.36	0.44
up	LOC777194	MSL1	27	4354437	4359680	+	pcg	0.0011	1.38	0.46	0.011	1.35	0.44
up	LOC107055400	RBMS2	34	1516873	1520310	+	pcg	0.0232	1.31	0.39	0.0438	1.35	0.43
up	LOC373954	BCL2L1	20	10357392	10375562	-	pcg	0.4128	1.11	0.15	0.0304	1.35	0.43
up	LOC374053	RPS17	10	1362984	1364962	-	pcg	0.0401	1.29	0.37	0.0495	1.35	0.43
up	LOC396493	EPB41	23	2954863	3030570	+	pcg	0	0.66	-0.59	0.0022	1.35	0.43
up	LOC416224	RNF44	13	9982637	9996930	+	pcg	0.0062	1.33	0.41	0.0151	1.35	0.43
up	LOC416877	ATXN2	15	6137562	6187575	-	pcg	0	0.68	-0.57	0.0017	1.35	0.43
up	LOC417226	CDK9	17	5572380	5578978	-	pcg	0.2731	1.11	0.16	0.0054	1.35	0.43
up	LOC419514	GFPT1	22	164373	193708	+	pcg	0.6006	1.06	0.08	0.0066	1.35	0.43
up	LOC419764	SIK3	24	5169214	5244071	-	pcg	0.2721	1.1	0.14	0.0015	1.35	0.43
up	LOC421985	NRBP1	3	104219492	104245135	-	pcg	0	2.13	1.09	0.0019	1.35	0.43
up	LOC422209	ZMYM3	4	2238407	2269728	+	pcg	0.9005	0.98	-0.03	0.043	1.35	0.43
up	LOC422595	LIN54	4	45859899	45898416	+	pcg	0	0.33	-1.61	0.0198	1.35	0.43
up	LOC423083	SPTY2D1	5	12197333	12212700	-	pcg	0	1.83	0.87	0.0103	1.35	0.43
up	LOC425052	TCP11X2	1	53927649	53943983	-	pcg	0.0595	0.82	-0.29	0.0152	1.35	0.43
up	LOC426522	GPATCH8	27	1137404	1172560	+	pcg	0.5109	1.07	0.1	0.0058	1.35	0.43
up	LOC428260	STK38	26	1600183	1612506	-	pcg	0.0377	0.82	-0.28	0.0061	1.35	0.43
up	LOC769912	PITPNM1	5	609371	618737	+	pcg	0.0159	0.75	-0.42	0.0403	1.35	0.43
up	LOC395102	POLH	3	30560108	30568614	-	pcg	0.0021	1.42	0.51	0.0407	1.34	0.42
up	LOC396251	THRA	27	4330936	4344802	+	pcg	0.0004	1.44	0.53	0.0218	1.34	0.42
up	LOC416678	UBE2H	1	1391668	1435859	-	pcg	0.1712	1.15	0.2	0.0115	1.34	0.42
up	LOC418034	ANKRD54	1	51146848	51152340	+	pcg	0	2.24	1.16	0.0121	1.34	0.42
up	LOC419304	NCOA5	20	10945153	10962834	-	pcg	0.3457	0.91	-0.14	0.0069	1.34	0.42
up	LOC420078	DOT1L	28	2461462	2520294	-	pcg	0.0652	0.84	-0.25	0.0069	1.33	0.42
up	LOC421817	PNRC1	3	75523710	75525986	-	pcg	0.5895	0.95	-0.08	0.0041	1.34	0.42
up	LOC423041	AMPD3	5	8588981	8618006	-	pcg	0.5676	0.93	-0.11	0.0318	1.34	0.42
up	LOC423252	ZFYVE1	5	25946651	25972916	+	pcg	0.0145	1.22	0.29	0.002	1.34	0.42
up	LOC426147	UBAP2L	25	1897741	1920088	+	pcg	0.0131	0.8	-0.32	0.005	1.34	0.42
up	LOC426855	WDR7	Z	805920	921704	-	pcg	0.158	1.12	0.16	0.0005	1.34	0.42
up	LOC427087	CCDC124	28	3783528	3792196	+	pcg	0.1459	1.18	0.24	0.0234	1.34	0.42
up	LOC428158	ASXL1	20	10500915	10516306	+	pcg	0.1133	1.19	0.25	0.0193	1.34	0.42
up	LOC429271	THAP4	9	4466420	4480759	+	pcg	0.052	1.19	0.26	0.0058	1.34	0.42
up	LOC100859215	CCNT1	34	83250	92062	+	pcg	0.0256	0.81	-0.3	0.0084	1.33	0.41
up	LOC101751943	RAPGEF6	13	16078167	16184488	-	pcg	0.0006	1.38	0.47	0.014	1.33	0.41
up	LOC416258	LARP1	13	11658949	11702556	-	pcg	0	0.57	-0.82	0.0169	1.33	0.41
up	LOC416974	RNF10	15	9262457	9279552	-	pcg	0.0082	1.33	0.42	0.0354	1.33	0.41
up	LOC419852	CD55	26	2687114	2693006	+	pcg	0.0693	1.23	0.3	0.0361	1.33	0.41
up	LOC423525	PPM1A	5	54014859	54047791	-	pcg	0	0.62	-0.69	0.0208	1.32	0.41
up	LOC424950	ABCF3	9	15540046	15547707	+	pcg	0	1.68	0.75	0.0061	1.33	0.41
up	LOC426663	SPATS2	34	1838647	1860169	-	pcg	0	1.66	0.73	0.0151	1.33	0.41
up	LOC428275	SMARCD2	27	1356251	1369006	-	pcg	0.3361	1.11	0.15	0.0173	1.32	0.41
up	LOC503574	SNRNP200	22	2940224	2959888	-	pcg	0.9201	0.99	-0.02	0.0191	1.32	0.41
up	LOC772071	LOC772071	4	14171875	14199171	-	pcg	0.2492	1.15	0.2	0.0317	1.33	0.41
up	LOC777580	WNK4	27	5037365	5049092	+	pcg	0.0492	1.24	0.31	0.0266	1.33	0.41
up	LOC100859441	CERS2	25	2591510	2595840	-	pcg	0.1086	1.16	0.21	0.0063	1.32	0.4
up	LOC101749358	THAP11	11	910339	913204	+	pcg	0.0073	1.33	0.41	0.0336	1.32	0.4
up	LOC103214197	SIRT7	18	10591964	10596690	-	pcg	0.9927	1	0	0.0274	1.32	0.4
up	LOC374234	SPTAN1	17	5815166	5861030	+	pcg	0.0092	0.8	-0.33	0.0067	1.32	0.4
up	LOC395557	NUDT16L1	14	12352132	12354585	-	pcg	0.1226	1.18	0.24	0.0258	1.32	0.4
up	LOC396492	GLG1	11	1822518	1881780	-	pcg	0	1.62	0.7	0.024	1.32	0.4
up	LOC415455	PDE8A	10	10945556	11087058	+	pcg	0.3096	0.9	-0.14	0.0106	1.32	0.4
up	LOC416226	CLTB	13	10012227	10019145	+	pcg	0.1067	1.18	0.24	0.0162	1.32	0.4
up	LOC417359	UBE2O	18	5004775	5054351	+	pcg	0.3861	0.91	-0.13	0.0139	1.32	0.4
up	LOC417515	DTX2	19	4668813	4695084	-	pcg	0.797	1.03	0.04	0.0177	1.32	0.4
up	LOC419052	PGM2L1	1	194542295	194581626	-	pcg	0	0.57	-0.82	0.0331	1.32	0.4
up	LOC419738	VPS26B	24	2601052	2611086	+	pcg	0	1.9	0.93	0.014	1.32	0.4
up	LOC423276	ZFYVE26	5	28414041	28457682	-	pcg	0	0.55	-0.85	0.0362	1.32	0.4
up	LOC423369	VASH1	5	38373350	38388289	+	pcg	0.5029	1.07	0.09	0.0051	1.32	0.4
up	LOC424474	AGL	8	11802828	11838827	-	pcg	0	0.52	-0.95	0.0198	1.32	0.4
up	LOC425378	DEDD	25	2854591	2859210	+	pcg	0.0008	1.43	0.52	0.0384	1.32	0.4
up	LOC426238	DCTN1	4	90523641	90565928	-	pcg	0.3534	1.1	0.14	0.0159	1.32	0.4
up	LOC100310814	SELENOW	38	250514	252411	+	pcg	0.0198	0.78	-0.35	0.0355	1.31	0.39
up	LOC100538349	UBE2V1	20	14081332	14095549	+	pcg	0.0614	1.22	0.29	0.0355	1.31	0.39
up	LOC395674	MCL1	25	2255543	2261274	+	pcg	0.7619	0.96	-0.05	0.0217	1.31	0.39
up	LOC395750	ETV6	1	71530710	71663472	+	pcg	0.001	1.3	0.37	0.0033	1.31	0.39
up	LOC416093	EIF4E3	12	16452731	16479851	-	pcg	0.0999	1.21	0.27	0.0484	1.31	0.39
up	LOC419671	MACF1	23	5703706	5818410	+	pcg	0.0001	0.66	-0.6	0.0418	1.31	0.39
up	LOC419922	TFEB	26	4966951	4981266	-	pcg	0	1.42	0.51	0.0023	1.31	0.39
up	LOC421148	ADIPOR1	26	1143056	1149555	+	pcg	0.0046	1.32	0.4	0.0221	1.31	0.39
up	LOC421816	PM20D2	3	75488610	75504695	-	pcg	0	0.54	-0.89	0.0321	1.31	0.39
up	LOC423547	NAA30	5	55115792	55136047	-	pcg	0.0092	1.3	0.38	0.0277	1.31	0.39
up	LOC423850	ARMH3	6	23337149	23442682	+	pcg	0	1.84	0.88	0.0063	1.31	0.39
up	LOC424110	NBEAL1	7	13301829	13381424	-	pcg	0	0.6	-0.73	0.0499	1.31	0.39
up	LOC424365	ATF6B	8	3720343	3791469	+	pcg	0	0.49	-1.02	0.0192	1.31	0.39
up	LOC424756	SAP130	9	1111376	1130913	-	pcg	0.0177	1.3	0.37	0.0453	1.31	0.39
up	LOC425673	SP2	27	3701286	3711540	-	pcg	0.0002	1.44	0.53	0.0315	1.31	0.39
up	LOC426327	GMCL1	22	3325423	3336309	+	pcg	0	1.53	0.61	0.0027	1.31	0.39
up	LOC426787	GOLGA7	22	2758259	2762084	+	pcg	0.3364	0.89	-0.16	0.0392	1.31	0.39
up	LOC428876	DCAF5	5	27644803	27711269	+	pcg	0.0001	0.66	-0.6	0.0437	1.31	0.39
up	LOC770709	CHCHD7	2	110983640	111016293	+	pcg	0	0.59	-0.75	0.0177	1.31	0.39
up	LOC100858156	PPP1CA	5	161729	164006	-	pcg	0.0061	1.32	0.4	0.032	1.3	0.38
up	LOC107050924	TMBIM6	34	111258	116479	-	pcg	0.3316	1.1	0.14	0.0133	1.3	0.38
up	LOC107055209	STRIP1	26	1354483	1363086	+	pcg	0.4148	1.08	0.11	0.0071	1.3	0.38
up	LOC373972	PRPF40A	7	35162323	35180964	-	pcg	0.0001	1.39	0.48	0.0104	1.3	0.38
up	LOC374206	SAP18	1	178489739	178492275	-	pcg	0.0282	1.25	0.33	0.0323	1.3	0.38
up	LOC416753	ATP6V0C	14	13904471	13915227	-	pcg	0.7963	0.97	-0.05	0.0446	1.3	0.38
up	LOC417437	WIPI1	18	8460177	8478719	-	pcg	0.5758	0.95	-0.08	0.0071	1.3	0.38
up	LOC419517	CDS2	22	365495	388343	-	pcg	0.002	0.74	-0.43	0.0241	1.3	0.38
up	LOC420380	SCAP	2	920538	971115	+	pcg	0.0236	0.82	-0.29	0.014	1.3	0.38
up	LOC421921	CMPK2	3	94666168	94672677	-	pcg	0.7659	0.96	-0.05	0.041	1.3	0.38
up	LOC422141	SLC25A14	4	1513860	1520737	-	pcg	0.0641	0.82	-0.28	0.0333	1.3	0.38
up	LOC100859845	ATG101	34	144346	147195	-	pcg	0.0022	1.33	0.41	0.0283	1.29	0.37
up	LOC416389	CAPN15	14	13412057	13460741	+	pcg	0.4935	0.93	-0.1	0.0199	1.29	0.37
up	LOC416501	USP22	14	4567622	4655536	+	pcg	0.0005	1.41	0.49	0.0404	1.29	0.37
up	LOC417071	SBF1	1	1119024	1180429	-	pcg	0.8578	1.02	0.03	0.0429	1.29	0.37
up	LOC417194	ASB6	17	6249131	6254155	-	pcg	0.8868	0.98	-0.02	0.0104	1.29	0.37
up	LOC418689	TMEM131	1	132191527	132283053	+	pcg	0.7963	0.97	-0.04	0.0211	1.3	0.37
up	LOC418926	PAN3	1	175775831	175853306	-	pcg	0.2248	0.9	-0.15	0.0055	1.29	0.37
up	LOC419264	GMEB2	20	10058416	10071612	+	pcg	0.0077	1.26	0.33	0.0128	1.3	0.37
up	LOC419768	BACE1	24	5290701	5300963	-	pcg	0.0748	1.2	0.27	0.0395	1.29	0.37
up	LOC420073	CACTIN	28	1450704	1456173	+	pcg	0.0092	1.25	0.32	0.0115	1.29	0.37
up	LOC426509	R3HDM2	34	1698615	1722578	-	pcg	0	1.47	0.55	0.0188	1.29	0.37
up	LOC427046	SAFB2	28	1773572	1787153	+	pcg	0.3764	1.1	0.14	0.0385	1.29	0.37
up	LOC431066	PNPLA2	5	15350110	15376279	-	pcg	0.0199	0.79	-0.34	0.0406	1.29	0.37
up	LOC771058	BMP8A	23	5817367	5826080	+	pcg	0.0007	0.73	-0.45	0.027	1.29	0.37
up	LOC771781	TBC1D20	20	10300969	10309731	+	pcg	0.3281	1.1	0.14	0.0204	1.29	0.37
up	LOC771869	FBXL20	27	4107625	4129066	-	pcg	0.6856	0.95	-0.07	0.0317	1.29	0.37
up	LOC396274	CTCF	11	1129378	1159386	+	pcg	0.1713	1.12	0.16	0.0048	1.28	0.36
up	LOC425126	USF1	25	90664	99188	-	pcg	0	1.42	0.5	0.0122	1.29	0.36
up	LOC428348	MAU2	28	3948722	3963851	-	pcg	0	0.72	-0.47	0.0066	1.28	0.36
up	LOC428975	CNNM2	6	24186884	24293614	+	pcg	0.0169	1.28	0.35	0.0484	1.28	0.36
up	LOC769358	RBMX2	4	1521127	1523448	-	pcg	0	1.49	0.57	0.0221	1.28	0.36
up	LOC769960	RAB40C	14	13543506	13568655	+	pcg	0.119	1.16	0.21	0.02	1.28	0.36
up	LOC771295	SNRNP27	22	3396021	3397931	+	pcg	0.0555	1.21	0.27	0.034	1.28	0.36
up	LOC121108220	LOC121108220	W	485595	532786	+	pcg	0.801	1.03	0.04	0.0446	1.28	0.35
up	LOC374077	GNA11	28	1673548	1689516	+	pcg	0.3285	1.11	0.15	0.0472	1.28	0.35
up	LOC396085	NF1	19	9485096	9581107	-	pcg	0	0.5	-0.99	0.028	1.27	0.35
up	LOC415307	SIN3A	10	2684339	2709659	-	pcg	0.148	1.16	0.22	0.0499	1.28	0.35
up	LOC417961	HEBP1	1	48284734	48291397	-	pcg	0.161	0.88	-0.19	0.0222	1.27	0.35
up	LOC419512	AAK1	22	82640	148702	+	pcg	0.956	0.99	-0.01	0.0179	1.27	0.35
up	LOC426469	ANKRD52	34	1450901	1470960	-	pcg	0.2715	1.1	0.14	0.0095	1.28	0.35
up	LOC426631	FNBP4	5	582611	592257	+	pcg	0.9183	1.01	0.02	0.01	1.27	0.35
up	LOC771015	CRTC1	28	4248686	4288786	-	pcg	0.8874	0.99	-0.02	0.0069	1.28	0.35
up	LOC417387	MBTD1	18	5691851	5721530	-	pcg	0.0051	0.79	-0.34	0.0251	1.26	0.34
up	LOC417472	MTMR4	19	1137815	1181844	-	pcg	0	2.26	1.17	0.0497	1.27	0.34
up	LOC424122	UBE2E3	7	14132906	14189226	-	pcg	0.6708	0.95	-0.07	0.0468	1.26	0.34
up	LOC424706	SERBP1	8	28353392	28371464	-	pcg	0.5571	1.07	0.09	0.0424	1.27	0.34
up	LOC424800	RHBDD1	9	8937530	8968597	+	pcg	0.0192	0.81	-0.31	0.0324	1.27	0.34
up	LOC426493	SUPT5H	38	1	7466	-	pcg	0.7876	1.03	0.05	0.0446	1.27	0.34
up	LOC428335	LOC428335	28	3080555	3092029	+	pcg	0.0834	1.16	0.22	0.0214	1.27	0.34
up	LOC415744	DNAJA2	11	7360693	7371436	+	pcg	0.0898	0.87	-0.21	0.0205	1.25	0.33
up	LOC418000	EP300	1	49817744	49876373	-	pcg	0.0003	0.73	-0.45	0.0329	1.26	0.33
up	LOC418335	GSK3A	1	80020837	80162885	+	pcg	0.6161	0.96	-0.06	0.012	1.26	0.33
up	LOC420081	SCAMP4	28	2608264	2616066	-	pcg	0.2287	0.89	-0.17	0.038	1.26	0.33
up	LOC420376	DHX30	2	763065	795511	-	pcg	0.1515	1.11	0.16	0.0071	1.26	0.33
up	LOC423926	CACUL1	6	30595021	30636518	-	pcg	0.9494	1.01	0.01	0.0319	1.26	0.33
up	LOC424218	TMBIM1	7	22182137	22188080	+	pcg	0.0004	0.73	-0.46	0.0443	1.26	0.33
up	LOC100858001	DDX23	34	40173	45325	+	pcg	0	1.44	0.53	0.043	1.24	0.32
up	LOC417496	ZZEF1	19	3693681	3747825	+	pcg	0	0.65	-0.61	0.0242	1.25	0.32
up	LOC417664	VEZF1	19	9194082	9217036	+	pcg	0.301	1.09	0.12	0.0113	1.25	0.32
up	LOC419402	GNB1	21	1922253	1956082	+	pcg	0.0072	1.26	0.33	0.0354	1.25	0.32
up	LOC426023	PCBP2	34	1033141	1048072	-	pcg	0.0012	1.3	0.38	0.0264	1.25	0.32
up	LOC428306	CDK12	27	4143215	4165667	+	pcg	0.6227	1.04	0.06	0.0071	1.25	0.32
up	LOC100859297	ARID3B	10	2509614	2540584	-	pcg	0.5924	1.06	0.08	0.0454	1.24	0.31
up	LOC417348	TNRC6C	18	4598449	4688888	+	pcg	0.6127	0.96	-0.06	0.0171	1.24	0.31
up	LOC419581	WDTC1	23	2262690	2286304	+	pcg	0.0033	1.26	0.33	0.0234	1.24	0.31
up	LOC422886	RNF4	4	82086448	82102469	-	pcg	0.43	0.93	-0.1	0.0244	1.24	0.31
up	LOC425772	TRIM7.2	16	2076591	2081518	-	pcg	0.0056	1.27	0.34	0.0446	1.24	0.31
up	LOC426353	UBQLN4	25	401312	412628	+	pcg	0.984	1	0	0.0256	1.24	0.31
up	LOC770718	TRIM58	19	896340	901750	+	pcg	0.0005	1.3	0.38	0.0234	1.24	0.31
up	LOC417580	PHF12	19	6367076	6394971	-	pcg	0.536	1.06	0.08	0.0354	1.23	0.3
up	LOC101751641	ZBTB44	24	1644162	1708722	-	pcg	0	0.68	-0.55	0.0413	1.23	0.29
up	LOC420286	RAD21	2	134540364	134564313	-	pcg	0.0339	0.84	-0.25	0.0426	1.22	0.29
up	LOC421832	SNX14	3	76615714	76662884	+	pcg	0.0839	1.14	0.19	0.0229	1.22	0.29
up	LOC422463	OTUD4	4	30599884	30630284	-	pcg	0.7704	1.02	0.03	0.0093	1.22	0.29
up	LOC424726	SGF29	8	29512543	29517543	+	pcg	0.0151	1.22	0.28	0.045	1.22	0.29
up	LOC419917	NFYA	26	4763134	4777520	+	pcg	0.5537	1.06	0.08	0.049	1.21	0.28
up	LOC424946	RNPEPL1	9	15409651	15423371	-	pcg	0.073	1.15	0.2	0.0355	1.21	0.28
up	LOC396360	SLMAP	12	8940492	9017780	+	pcg	0.316	1.08	0.12	0.0355	1.21	0.27
up	LOC426230	PCNX1	5	26715969	26802396	-	pcg	0.0117	0.84	-0.26	0.036	1.2	0.26
up	LOC426359	WASF2	23	2330532	2359519	-	pcg	0.0246	1.18	0.24	0.0465	1.2	0.26
up	LOC427164	TRIM23	Z	21136804	21157454	-	pcg	0	0.63	-0.67	0.0459	1.19	0.25
up	INRAGALG00000005523	INRAGALG00000005523	17	1367167	1370889	-	lnc	0	0.01	-6.13	0.0018	10.07	3.33
up	INRAGALG00000014138	INRAGALG00000014138	5	37732660	37734901	-	lnc	0.9654	1	-0.01	0.0068	9.9	3.31
up	INRAGALG00000019171	INRAGALG00000019171	16	672806	674241	+	lnc	0.9714	1.02	0.03	0	7.16	2.84
up	INRAGALG00000018216	INRAGALG00000018216	31	2180880	2183009	-	lnc	0	9.59	3.26	0.0018	6.86	2.78
up	INRAGALG00000100644	INRAGALG00000100644	1	50629260	50630339	-	lnc	0.0625	2.22	1.15	0	6.38	2.67
up	NONGGAG000302	NONGGAG000302	1	60334566	60337082	+	lnc	0.0011	5.19	2.38	0.0018	6.3	2.66
up	INRAGALG00000100645	INRAGALG00000100645	1	50633865	50634735	-	lnc	0.9675	1.03	0.04	3e-04	5.93	2.57
up	FRAGALG000000075744	FRAGALG000000075744	21	618335	620826	-	lnc	0.0108	3.88	1.96	0.0067	5.44	2.44
up	FRAGALG000000012547	FRAGALG000000012547	12	1919902	1920833	-	lnc	0.1878	2.15	1.11	0.0129	5.03	2.33
up	LOC124417388	LOC124417388	24	3123101	3128290	-	lnc	0.4926	0.68	-0.55	0.0068	4.9	2.29
up	LOC121107790	LOC121107790	30	351115	353541	-	lnc	0	0.04	-4.53	2e-04	4.84	2.28
up	FRAGALG000000037608	FRAGALG000000037608	27	5119971	5124005	+	lnc	0.1501	2.1	1.07	0.0085	4.57	2.19
up	INRAGALG00000014582	INRAGALG00000014582	5	58491222	58496391	-	lnc	0.5924	0.78	-0.36	0.0011	4.53	2.18
up	INRAGALG00000008939	INRAGALG00000008939	21	6290888	6294806	-	lnc	4e-04	0.31	-1.69	1e-04	4.45	2.15
up	ENSGALG00010007027	ENSGALG00010007027	5	37711055	37713889	+	lnc	0	16.26	4.02	0.0429	4.24	2.08
up	INRAGALG00000004743	INRAGALG00000004743	13	13095910	13107263	-	lnc	0.4061	0.7	-0.52	0.0017	4.14	2.05
up	INRAGALG00000015524	INRAGALG00000015524	7	14189821	14199612	-	lnc	0.0146	0.32	-1.64	0.0112	4.07	2.02
up	INRAGALG00000009713	INRAGALG00000009713	27	4639066	4639856	-	lnc	0.2095	1.91	0.93	0.0145	4.04	2.01
up	INRAGALG00000008938	INRAGALG00000008938	21	6288715	6290727	-	lnc	0	0.19	-2.42	0.0011	3.97	1.99
up	INRAGALG00000002348	INRAGALG00000002348	1	132288032	132290710	+	lnc	0	4.81	2.27	0	3.9	1.97
up	FRAGALG000000021913	FRAGALG000000021913	11	9699857	9702524	-	lnc	0	5.99	2.58	0.011	3.86	1.95
up	FRAGALG000000026784	FRAGALG000000026784	2	47890764	47894402	-	lnc	0.5366	0.68	-0.55	0.0427	3.87	1.95
up	INRAGALG00000016337	INRAGALG00000016337	8	24922366	24925026	-	lnc	0.5967	0.79	-0.34	0.0025	3.82	1.93
up	INRAGALG00000009912	INRAGALG00000009912	3	2470674	2472526	+	lnc	0.3242	1.55	0.63	0.0058	3.75	1.91
up	FRAGALG000000005478	FRAGALG000000005478	4	10943432	10945637	-	lnc	0.2866	0.55	-0.86	0.0377	3.74	1.9
up	INRAGALG00000005124	INRAGALG00000005124	14	12154215	12156685	+	lnc	0.9909	1	0	0.0051	3.7	1.89
up	FRAGALG000000018437	FRAGALG000000018437	9	14457049	14461286	-	lnc	0.0455	0.34	-1.55	0.0427	3.71	1.89
up	INRAGALG00000100344	INRAGALG00000100344	1	118459686	118462402	+	lnc	0	0.18	-2.45	0.0092	3.66	1.87
up	INRAGALG00000008662	INRAGALG00000008662	20	9739911	9743582	-	lnc	0.7146	0.84	-0.26	0.0073	3.6	1.85
up	DAVISGALG000005960	DAVISGALG000005960	1	49709559	49710306	-	lnc	0.8313	0.9	-0.16	0.0103	3.58	1.84
up	INRAGALG00000023346	INRAGALG00000023346	2	127479075	127482251	+	lnc	0	0.02	-5.53	0.0167	3.54	1.82
up	INRAGALG00000006301	INRAGALG00000006301	2	8541343	8542176	+	lnc	0.316	1.57	0.65	0.0107	3.52	1.81
up	DAVISGALG000048985	DAVISGALG000048985	19	7960360	7960866	+	lnc	0.1746	0.51	-0.98	0.0327	3.44	1.78
up	INRAGALG00000010916	INRAGALG00000010916	3	52412618	52414499	+	lnc	0.0341	2.42	1.28	0.012	3.42	1.77
up	LOC107054419	LOC107054419	12	13802072	13816956	+	lnc	0.3965	0.63	-0.67	0.0468	3.39	1.76
up	LOC121107276	LOC121107276	19	7342001	7345155	+	lnc	0.0264	0.37	-1.42	0.0205	3.4	1.76
up	INRAGALG00000016531	INRAGALG00000016531	9	4858788	4862160	+	lnc	0.0103	0.46	-1.12	6e-04	3.24	1.7
up	ENSGALG00010024249	ENSGALG00010024249	8	12733694	12833930	+	lnc	0.1432	0.53	-0.92	0.0205	3.18	1.67
up	FRAGALG000000080537	FRAGALG000000080537	7	9808211	9813209	-	lnc	0.9748	0.99	-0.02	0.009	3.17	1.67
up	INRAGALG00000101539	INRAGALG00000101539	14	12412929	12416054	+	lnc	0.0385	1.72	0.79	1e-04	3.04	1.6
up	INRAGALG00000011526	INRAGALG00000011526	3	93246838	93248463	-	lnc	0.6552	1.2	0.26	0.0063	3.02	1.59
up	INRAGALG00000010134	INRAGALG00000010134	3	15689542	15692737	-	lnc	0.4677	1.45	0.53	0.0484	3	1.58
up	LOC107054806	LOC107054806	19	7346641	7352562	+	lnc	0.0473	0.55	-0.85	0.0011	2.98	1.58
up	INRAGALG00000100173	INRAGALG00000100173	1	62146368	62147378	+	lnc	0	7.71	2.95	0.0196	2.97	1.57
up	INRAGALG00000016516	INRAGALG00000016516	9	4625415	4626993	+	lnc	0.9342	0.95	-0.07	0.0385	2.94	1.56
up	INRAGALG00000011867	INRAGALG00000011867	30	635687	636980	-	lnc	0.5226	1.36	0.44	0.0368	2.92	1.54
up	DAVISGALG000030304	DAVISGALG000030304	5	10940803	10942623	-	lnc	0.5402	0.79	-0.34	0.0076	2.89	1.53
up	ENSGALG00010026470	ENSGALG00010026470	27	5080290	5081641	+	lnc	0.4458	1.3	0.38	0.0026	2.88	1.53
up	NONGGAG001440	NONGGAG001440	13	17868019	17880393	-	lnc	3e-04	4.27	2.1	0.0337	2.9	1.53
up	INRAGALG00000005403	INRAGALG00000005403	15	10112347	10114412	-	lnc	0.3604	1.18	0.24	0	2.87	1.52
up	INRAGALG00000101867	INRAGALG00000101867	18	5090706	5093790	-	lnc	0.4646	0.75	-0.41	0.0106	2.88	1.52
up	INRAGALG00000003796	INRAGALG00000003796	11	1180885	1185776	+	lnc	0.4725	1.31	0.39	0.0082	2.85	1.51
up	INRAGALG00000004411	INRAGALG00000004411	12	11541371	11542464	+	lnc	0.5237	0.74	-0.43	0.0403	2.83	1.5
up	INRAGALG00000005309	INRAGALG00000005309	15	6509273	6509803	-	lnc	0	6.14	2.62	0.0276	2.73	1.45
up	INRAGALG00000005682	INRAGALG00000005682	17	10244514	10246740	+	lnc	0.5552	1.25	0.32	0.0089	2.71	1.44
up	INRAGALG00000010137	INRAGALG00000010137	3	15732320	15745603	+	lnc	0.0515	1.77	0.82	0.0029	2.69	1.43
up	FRAGALG000000043040	FRAGALG000000043040	4	64337925	64344256	+	lnc	0.3759	1.28	0.36	5e-04	2.7	1.43
up	INRAGALG00000001038	INRAGALG00000001038	1	56703301	56704751	-	lnc	0	0.18	-2.44	0.0115	2.68	1.42
up	INRAGALG00000101489	INRAGALG00000101489	13	16726155	16727785	-	lnc	0.2049	0.58	-0.79	0.0491	2.68	1.42
up	LOC107054224	LOC107054224	10	20079525	20087415	-	lnc	0.1252	1.68	0.75	0.0109	2.67	1.42
up	FRAGALG000000053875	FRAGALG000000053875	W	2163372	2184785	+	lnc	0.979	1.01	0.02	0.014	2.61	1.38
up	DAVISGALG000049475	DAVISGALG000049475	20	5201481	5203441	+	lnc	0.9129	0.95	-0.07	0.0334	2.59	1.37
up	INRAGALG00000005149	INRAGALG00000005149	14	13227318	13232277	+	lnc	0.1578	0.71	-0.5	3e-04	2.59	1.37
up	INRAGALG00000016529	INRAGALG00000016529	9	4855008	4870818	+	lnc	0.0167	0.4	-1.31	0.047	2.53	1.34
up	INRAGALG00000019362	INRAGALG00000019362	30	346544	349451	-	lnc	0	0.02	-5.68	0.0055	2.53	1.34
up	INRAGALG00000009966	INRAGALG00000009966	3	4484777	4487361	+	lnc	1e-04	0.32	-1.62	0.0064	2.52	1.33
up	INRAGALG00000005780	INRAGALG00000005780	18	5001958	5003311	+	lnc	0.2193	1.38	0.47	0.0012	2.5	1.32
up	INRAGALG00000001417	INRAGALG00000001417	1	76809609	76811592	+	lnc	0.5551	1.27	0.35	0.0346	2.48	1.31
up	INRAGALG00000002477	INRAGALG00000002477	1	139222307	139227373	+	lnc	0.1416	1.72	0.78	0.0352	2.47	1.31
up	INRAGALG00000013757	INRAGALG00000013757	5	16583082	16583756	+	lnc	0.0028	2.93	1.55	0.0417	2.48	1.31
up	LOC121107307	LOC121107307	20	14055686	14059598	-	lnc	2e-04	3.4	1.77	0.0289	2.47	1.3
up	INRAGALG00000009377	INRAGALG00000009377	25	686961	687796	+	lnc	0.8034	1.11	0.15	0.0357	2.45	1.29
up	INRAGALG00000004045	INRAGALG00000004045	11	17338977	17339540	-	lnc	0.0016	2.17	1.12	0.0021	2.42	1.28
up	INRAGALG00000101179	INRAGALG00000101179	11	7384094	7408716	+	lnc	0	4.47	2.16	0.0085	2.39	1.26
up	INRAGALG00000007298	INRAGALG00000007298	2	67860246	67863679	-	lnc	0.7536	0.9	-0.15	0.0083	2.38	1.25
up	INRAGALG00000004407	INRAGALG00000004407	12	11123968	11124436	+	lnc	0.0447	0.52	-0.94	0.0282	2.34	1.23
up	DAVISGALG000002446	DAVISGALG000002446	Z	51332467	51335470	+	lnc	0.462	1.29	0.37	0.0273	2.28	1.19
up	DAVISGALG000023689	DAVISGALG000023689	3	76609468	76611282	+	lnc	0.0138	2.1	1.07	0.0239	2.26	1.18
up	INRAGALG00000019894	INRAGALG00000019894	5	10903487	10905890	-	lnc	0.3195	1.37	0.45	0.0185	2.26	1.18
up	INRAGALG00000101487	INRAGALG00000101487	13	16074915	16076258	-	lnc	0.3027	1.37	0.45	0.0141	2.27	1.18
up	LOC124418142	LOC124418142	8	12732313	12744564	+	lnc	0.0558	0.52	-0.93	0.0458	2.26	1.18
up	FRAGALG000000025896	FRAGALG000000025896	1	14024781	14036052	+	lnc	0.0561	1.88	0.91	0.0375	2.27	1.18
up	LOC121107412	LOC121107412	22	2446319	2453932	-	lnc	3e-04	0.52	-0.95	1e-04	2.25	1.17
up	DAVISGALG000025915	DAVISGALG000025915	4	14187141	14187887	-	lnc	0.9443	1.02	0.03	0.006	2.15	1.1
up	NONGGAG002019	NONGGAG002019	19	6312397	6315286	+	lnc	0.1653	1.5	0.59	0.024	2.14	1.1
up	FRAGALG000000001338	FRAGALG000000001338	16	1702675	1706888	-	lnc	3e-04	2.04	1.03	0.0011	2.13	1.09
up	INRAGALG00000101329	INRAGALG00000101329	12	2584067	2584650	-	lnc	0.0073	0.45	-1.15	0.0407	2.12	1.08
up	INRAGALG00000101893	INRAGALG00000101893	19	4990963	5003859	+	lnc	0.1208	0.66	-0.6	0.014	2.11	1.08
up	INRAGALG00000101177	INRAGALG00000101177	11	6955181	6956168	+	lnc	0.114	1.63	0.71	0.0494	2.06	1.04
up	INRAGALG00000101099	INRAGALG00000101099	10	20281398	20284089	+	lnc	0.4996	0.82	-0.29	0.0288	2.02	1.02
up	ENSGALG00010030048	ENSGALG00010030048	18	10703828	10709408	+	lnc	0.1422	1.38	0.47	0.0048	2	1
up	LOC107052522	LOC107052522	2	44739294	44744340	-	lnc	0.7731	1.1	0.14	0.0478	2	1
up	ENSGALG00010023842	ENSGALG00010023842	5	401170	404658	+	lnc	1e-04	0.45	-1.15	0.0063	1.95	0.96
up	LOC121111067	LOC121111067	6	5919269	5927904	-	lnc	0.1775	1.45	0.53	0.0349	1.95	0.96
up	INRAGALG00000101485	INRAGALG00000101485	13	16069701	16071861	-	lnc	0.2171	1.36	0.45	0.0274	1.87	0.9
up	DAVISGALG000025411	DAVISGALG000025411	4	4371223	4373727	-	lnc	0.9601	1.02	0.02	0.0363	1.84	0.88
up	INRAGALG00000104305	INRAGALG00000104305	5	37296826	37310307	+	lnc	0.1903	0.74	-0.43	0.0185	1.83	0.87
up	LOC124417078	LOC124417078	9	14626639	14630573	+	lnc	0	2.95	1.56	0.0236	1.82	0.87
up	ENSGALG00010002795	ENSGALG00010002795	2	30786451	30802967	-	lnc	0	0.18	-2.47	0.0442	1.82	0.86
up	INRAGALG00000012540	INRAGALG00000012540	4	31524877	31530823	-	lnc	0	0.27	-1.91	0.0288	1.8	0.85
up	LOC107052116	LOC107052116	6	10093676	10098079	+	lnc	0	0.32	-1.65	0.0399	1.8	0.85
up	LOC121107365	LOC121107365	21	554435	557139	-	lnc	0.4121	1.23	0.3	0.0378	1.8	0.85
up	INRAGALG00000007459	INRAGALG00000007459	2	85220144	85226754	-	lnc	0.3931	1.22	0.29	0.0222	1.78	0.84
up	INRAGALG00000004044	INRAGALG00000004044	11	17334535	17338907	-	lnc	0.0632	1.43	0.52	0.0106	1.76	0.82
up	LOC124417875	LOC124417875	3	16823844	16832151	+	lnc	0.0215	1.63	0.7	0.0274	1.75	0.81
up	FRAGALG000000006896	FRAGALG000000006896	34	1401667	1402540	+	lnc	0.2344	0.82	-0.29	0.0026	1.75	0.8
up	ENSGALG00010018304	ENSGALG00010018304	5	51091899	51094981	+	lnc	0.1346	0.71	-0.5	0.0451	1.73	0.79
up	DAVISGALG000020938	DAVISGALG000020938	3	26259416	26267124	+	lnc	0.0086	1.54	0.62	0.0052	1.71	0.78
up	ENSGALG00010012027	ENSGALG00010012027	4	79297098	79314290	+	lnc	0.0212	1.58	0.66	0.0258	1.71	0.77
up	LOC107053735	LOC107053735	6	27531644	27536470	+	lnc	0.0481	0.65	-0.61	0.0415	1.7	0.76
up	LOC107053389	LOC107053389	5	11140598	11171943	+	lnc	0	2.3	1.2	0.0448	1.68	0.74
up	DAVISGALG000045879	DAVISGALG000045879	15	577256	581903	+	lnc	0.0393	0.73	-0.45	0.0035	1.66	0.73
up	LOC121111168	LOC121111168	6	29935157	29944056	-	lnc	0.0338	0.7	-0.52	0.0116	1.65	0.73
up	LOC101747703	LOC101747703	20	5714503	5735019	+	lnc	0.1196	0.75	-0.42	0.0357	1.58	0.66
up	LOC124417281	LOC124417281	17	6036280	6058870	+	lnc	0.3907	1.18	0.24	0.037	1.56	0.65
up	ENSGALG00010000358	ENSGALG00010000358	JAENSK010000532.1	71803	76393	+	lnc	0	2.51	1.33	0.0464	1.55	0.63
up	FRAGALG000000058934	FRAGALG000000058934	16	1464619	1467614	+	lnc	0	2.71	1.44	0.0062	1.55	0.63
up	INRAGALG00000004871	INRAGALG00000004871	14	170325	171363	+	lnc	0.2952	1.21	0.27	0.0396	1.52	0.6
up	LOC101747497	LOC101747497	4	81958314	81974409	-	lnc	0.1766	0.79	-0.34	0.0418	1.51	0.6
up	DAVISGALG000002356	DAVISGALG000002356	Z	43812153	43814869	+	lnc	8e-04	0.63	-0.67	0.0239	1.47	0.56
up	LOC123611629	GINS4-PPP1RL	22	2762296	2770669	+	lnc	0.657	1.06	0.08	0.0045	1.43	0.52
up	ENSGALG00010017319	ENSGALG00010017319	13	16470908	16490922	+	lnc	0	1.6	0.68	0.005	1.39	0.47
up	DAVISGALG000046277	DAVISGALG000046277	15	6139262	6142697	-	lnc	0	0.43	-1.23	0.0105	1.33	0.41
down	LOC422831	C1QTNF7	4	76276024	76332101	-	pcg	0.0004	140.34	7.13	0.0002	0	-7.72
down	LOC121113328	LOC121113328	1	254982	257868	+	pcg	0	0.02	-5.98	0.0003	0.02	-5.63
down	ENSGALG00010003264	ENSGALG00010003264	16	51367	55851	-	pcg	0	0	-9.47	0.0051	0.04	-4.67
down	LOC395813	HAND2	4	42941841	42964036	-	pcg	0	297.39	8.22	0.0056	0.05	-4.22
down	FRAGALG000000001709	FRAGALG000000001709	2	106926334	106929387	+	pcg	0	265.57	8.05	0.0132	0.07	-3.94
down	LOC100857860	LOC100857860	JAENSK010000409.1	50343	53044	-	pcg	0.5416	1.65	0.72	0.0055	0.1	-3.39
down	LOC124417293	LOC124417293	18	4811966	4813225	-	pcg	0.2818	0.38	-1.41	0.0367	0.11	-3.2
down	LOC121106502	LOC121106502	16	1783940	1786016	-	pcg	0.0576	3	1.59	0.0014	0.12	-3.04
down	LOC769737	NQO1	11	18684306	18686161	-	pcg	0.0051	0.27	-1.89	0.0004	0.14	-2.8
down	LOC423574	ATP5S	5	57547461	57552367	+	pcg	0.5656	1.4	0.49	0.0005	0.15	-2.7
down	LOC427223	RLN3	Z	28040580	28043072	-	pcg	0.0024	0.25	-1.98	0.0003	0.16	-2.66
down	LOC417692	KIF21A	1	15536756	15621134	+	pcg	0	14.57	3.87	0.008	0.17	-2.59
down	LOC418057	RASD2	1	52076945	52085339	-	pcg	0.0012	0.15	-2.74	0.012	0.17	-2.59
down	LOC121106919	LOC121106919	16	887280	894915	+	pcg	0.7971	1.2	0.27	0.0149	0.17	-2.55
down	LOC424923	IQCG	9	14802253	14820792	-	pcg	0.2785	0.51	-0.96	0.0085	0.17	-2.54
down	LOC427851	GNAT3	1	11470630	11502268	+	pcg	0.3504	0.69	-0.53	0	0.19	-2.39
down	LOC425137	LOC425137	1	62201563	62221432	-	pcg	0	0.12	-3.06	0.0006	0.19	-2.38
down	LOC772372	BDKRB1	5	45894805	45897638	+	pcg	0.0001	6.4	2.68	0.0052	0.19	-2.36
down	LOC428140	MATN4	20	5497783	5511552	+	pcg	0.0002	6.3	2.66	0.0095	0.21	-2.27
down	LOC415807	HSD17B2	11	15392397	15401910	+	pcg	0	0.09	-3.52	0.0027	0.23	-2.13
down	LOC769486	LOC769486	25	1398828	1400924	-	pcg	0.031	2.63	1.39	0.0038	0.23	-2.12
down	LOC422761	LRRC66	4	65686345	65695337	+	pcg	0	6.31	2.66	0	0.24	-2.08
down	LOC100859631	LOC100859631	16	2613138	2617664	-	pcg	0.0002	0.15	-2.78	0.0298	0.24	-2.05
down	LOC426584	MATN2	2	126985296	127054855	+	pcg	0.0697	2.54	1.34	0.0178	0.24	-2.05
down	LOC418487	MAP3K7CL	1	104128556	104157956	+	pcg	0	0.04	-4.72	0.0372	0.25	-2.02
down	DAVISGALG000003190	DAVISGALG000003190	Z	67222941	67224488	-	pcg	0.0194	0.43	-1.21	0.0006	0.25	-2.01
down	LOC421017	FBXO15	2	91609665	91633896	+	pcg	0	0.24	-2.05	0.0001	0.25	-1.99
down	LOC426209	RNF217	3	59788029	59851026	-	pcg	0	7.93	2.99	0	0.25	-1.99
down	LOC422839	RAB28	4	76970268	77031663	+	pcg	0	4.67	2.22	0	0.25	-1.98
down	LOC426455	TMEM52B	1	78475967	78481557	-	pcg	0.6956	1.22	0.29	0.0068	0.26	-1.94
down	LOC419611	MANEAL	23	3932011	3935897	-	pcg	0.0178	3.58	1.84	0.0494	0.27	-1.88
down	LOC430411	SLC39A8	4	60184105	60302481	-	pcg	0	8.43	3.08	0.0281	0.28	-1.83
down	LOC374039	OGN	12	3616876	3628603	+	pcg	0.2805	1.79	0.84	0.0407	0.28	-1.81
down	LOC419236	SLC17A9	20	8784461	8799509	+	pcg	0.3156	0.64	-0.64	0.008	0.29	-1.78
down	LOC427884	HIST1H4D	1	48116358	48116920	+	pcg	0.2745	0.63	-0.67	0.0095	0.3	-1.76
down	LOC107049933	LOC107049933	16	357651	360821	-	pcg	0.0055	0.29	-1.77	0.0267	0.3	-1.73
down	LOC415408	PYGO1	10	7949755	7958594	+	pcg	0.7287	1.15	0.21	0.0025	0.3	-1.73
down	LOC420238	CPQ	2	126574393	126738157	+	pcg	0.0004	0.2	-2.34	0.0378	0.3	-1.72
down	DAVISGALG000003189	DAVISGALG000003189	Z	67217725	67220391	-	pcg	0.0004	0.38	-1.39	0.0002	0.31	-1.71
down	LOC415409	DNAAF4	10	7967338	7975025	+	pcg	0.1251	2.03	1.02	0.0275	0.31	-1.7
down	LOC771417	CENPS	21	3726420	3729591	+	pcg	0.0304	0.44	-1.19	0.0083	0.31	-1.7
down	ENSGALG00010025657	ENSGALG00010025657	9	4976421	4980457	+	pcg	0.4895	1.4	0.48	0.0239	0.31	-1.68
down	LOC427484	DUOXA2	10	1056769	1062167	+	pcg	0.2137	1.75	0.81	0.0221	0.31	-1.68
down	LOC418097	SYCP3	1	55605799	55616948	+	pcg	0.0076	2.67	1.42	0.0084	0.32	-1.66
down	LOC419072	LCMT2	1	196259647	196308806	+	pcg	0	0.28	-1.85	0.0017	0.32	-1.66
down	LOC427561	ACSF3	11	18209401	18250110	+	pcg	0	0.39	-1.37	0	0.32	-1.66
down	LOC428270	SYT6	26	3849203	3877855	-	pcg	0.0083	0.4	-1.33	0.0055	0.32	-1.65
down	LOC420698	LZTFL1	2	42696287	42720314	+	pcg	0.0448	2.35	1.23	0.0238	0.32	-1.64
down	LOC420528	FAM171A1	2	20399602	20484522	+	pcg	0.1413	0.59	-0.76	0.0049	0.32	-1.63
down	LOC423577	ATL1	5	57625769	57655326	+	pcg	0.1593	0.55	-0.87	0.0215	0.32	-1.63
down	LOC124417724	LOC124417724	2	40960266	40971305	+	pcg	0.0132	2.65	1.41	0.0181	0.33	-1.61
down	LOC776112	ETFRF1	1	67260480	67261433	+	pcg	0.5676	0.83	-0.27	0.0005	0.33	-1.61
down	LOC427540	HSF4	11	2481637	2496330	+	pcg	0	5.59	2.48	0.032	0.33	-1.59
down	LOC112532415	LOC112532415	4	33840039	33877844	-	pcg	0.0301	1.7	0.76	0.0001	0.34	-1.57
down	LOC424070	SGO2	7	10798102	10810533	+	pcg	0.9528	1.02	0.04	0.0023	0.34	-1.57
down	LOC426926	AKAP7	3	57072318	57145412	-	pcg	0	6.19	2.63	0.0058	0.34	-1.57
down	LOC422825	PROM1	4	76039401	76098578	+	pcg	0	12.2	3.61	0.0046	0.34	-1.56
down	DAVISGALG000019671	DAVISGALG000019671	3	2139840	2141791	+	pcg	0.0001	0.33	-1.62	0.0011	0.34	-1.55
down	LOC395334	OPN4-1	4	36763243	36831574	+	pcg	0.0271	0.45	-1.17	0.0148	0.35	-1.53
down	LOC101752310	C1orf186	26	2378776	2401263	+	pcg	0.7955	0.9	-0.15	0.0066	0.35	-1.52
down	LOC420876	RPP40	2	65286763	65298434	+	pcg	0.1223	1.85	0.88	0.0212	0.35	-1.52
down	LOC425021	PQLC2L	9	22383924	22404171	-	pcg	0.9383	0.96	-0.06	0.0251	0.35	-1.51
down	LOC396265	ARF5	1	994957	1005851	-	pcg	0.9239	1.06	0.08	0.0465	0.36	-1.47
down	LOC421493	COX20	3	34380909	34385249	-	pcg	0	0.14	-2.79	0.001	0.36	-1.47
down	LOC427453	IDNK	Z	40574771	40583716	+	pcg	0.0105	0.42	-1.26	0.0124	0.36	-1.47
down	LOC419665	KIAA1522	23	5605002	5627858	+	pcg	0.8588	0.93	-0.1	0.0066	0.36	-1.46
down	LOC421815	GABRR2	3	75396113	75426184	+	pcg	0	0.27	-1.91	0.0052	0.36	-1.46
down	LOC417503	IFT22	19	3993452	3997021	-	pcg	0.1062	0.64	-0.65	0.0011	0.37	-1.45
down	DAVISGALG000008891	DAVISGALG000008891	1	104756882	104757623	-	pcg	0.5244	1.28	0.36	0.0161	0.37	-1.42
down	LOC769392	SMIM20	4	72898760	72902783	-	pcg	0.6065	0.8	-0.33	0.0342	0.37	-1.42
down	LOC771988	TVP23A	14	9117583	9127566	+	pcg	0.0032	3.08	1.62	0.0382	0.37	-1.42
down	LOC421767	ARMC2	3	66841024	66936337	-	pcg	0.4226	0.75	-0.42	0.0125	0.38	-1.41
down	LOC121113247	LOC121113247	5	48988705	48993365	-	pcg	0.0154	1.95	0.96	0.0023	0.38	-1.4
down	LOC374222	GLDC	Z	28445965	28483985	-	pcg	0	0.25	-2.02	0.005	0.38	-1.4
down	LOC100858736	MORN3	15	5608603	5619003	-	pcg	0.0012	0.32	-1.63	0.0244	0.38	-1.39
down	LOC418358	ILDR1	1	83464302	83484912	-	pcg	0.1646	0.71	-0.49	0.0002	0.38	-1.39
down	DAVISGALG000010733	DAVISGALG000010733	1	144538389	144539725	+	pcg	0.7886	0.9	-0.15	0.0105	0.38	-1.38
down	LOC421648	TIAM2	3	50104602	50272752	+	pcg	0.1582	1.47	0.55	0.0011	0.38	-1.38
down	LOC421693	AHI1	3	55262040	55349964	+	pcg	0	13.41	3.75	0.0009	0.39	-1.38
down	LOC422760	SGCB	4	65680151	65686149	+	pcg	0	3.74	1.9	0.0011	0.39	-1.38
down	DAVISGALG000043825	DAVISGALG000043825	13	368812	372035	-	pcg	0	0.14	-2.8	0.0197	0.39	-1.36
down	LOC421600	PRRG4	5	5798078	5806151	+	pcg	0.0033	2.78	1.47	0.0274	0.39	-1.36
down	LOC416870	TCTN1	15	5994383	6006719	+	pcg	0.8048	0.93	-0.1	0.0003	0.39	-1.35
down	LOC427548	NUDT19	11	9556094	9559989	+	pcg	0.3671	0.76	-0.39	0.003	0.39	-1.35
down	LOC418631	GEMIN8	1	122908200	122935751	+	pcg	0.0096	1.88	0.91	0.001	0.4	-1.33
down	LOC424069	KCTD18	7	10789644	10800275	-	pcg	0.0042	2.49	1.32	0.0183	0.4	-1.32
down	LOC428773	CFI	4	57640930	57653787	+	pcg	0	5.8	2.54	0.0407	0.4	-1.32
down	LOC769146	ATP5I	Z	54171951	54173799	+	pcg	0.3785	1.42	0.51	0.0404	0.4	-1.32
down	LOC112530310	LOC112530310	31	1933133	1936031	+	pcg	0.4868	1.33	0.41	0.0415	0.4	-1.31
down	LOC423124	BEST1	5	16371467	16382747	+	pcg	0	5.81	2.54	0.0456	0.4	-1.31
down	LOC395613	CHRNB4	10	3626222	3638515	+	pcg	0	0.11	-3.21	0.0107	0.41	-1.3
down	LOC415405	CGNL1	10	7336469	7391275	-	pcg	0.9567	1.02	0.03	0.0127	0.41	-1.3
down	LOC423971	BNIP3	6	35587455	35593043	-	pcg	0	2.91	1.54	0	0.4	-1.3
down	LOC426369	SEC61A2	1	6888413	6904045	+	pcg	0.4235	0.8	-0.32	0.0019	0.4	-1.3
down	LOC427879	ART4	1	48087190	48091759	+	pcg	0	0.3	-1.76	0.0152	0.41	-1.3
down	LOC769006	COMMD1	3	9170500	9236967	+	pcg	0.4873	0.79	-0.34	0.0107	0.4	-1.3
down	LOC418486	CCT8	1	104102582	104113500	-	pcg	0	0.51	-0.97	0	0.41	-1.29
down	LOC101750971	PPP1R26	17	8314707	8324923	+	pcg	0.8279	0.95	-0.07	0	0.41	-1.28
down	LOC419042	RAD51AP1	1	73425818	73463426	-	pcg	0.76	0.91	-0.13	0.0019	0.41	-1.28
down	LOC423397	SPATA7	5	42561741	42596490	+	pcg	0.0685	0.53	-0.91	0.032	0.41	-1.28
down	FRAGALG000000049317	FRAGALG000000049317	28	2406254	2407710	-	pcg	0.378	1.34	0.42	0.0133	0.41	-1.28
down	LOC423463	HSP90AA1	5	48992977	49000184	-	pcg	0.0871	1.38	0.47	0	0.42	-1.26
down	LOC107049095	LOC107049095	16	869306	879551	-	pcg	0.5492	0.82	-0.29	0.0134	0.42	-1.24
down	LOC417510	ALKBH4	19	4638058	4639973	-	pcg	0	3.68	1.88	0.0028	0.42	-1.24
down	LOC416587	IL9R	14	7335698	7348272	+	pcg	0.8399	1.08	0.12	0.0302	0.43	-1.23
down	LOC416618	SDR42E2	14	8642920	8654353	+	pcg	0.3285	0.71	-0.5	0.0342	0.43	-1.23
down	LOC418171	AKR1E2	1	62187095	62195399	-	pcg	0.0018	0.41	-1.3	0.015	0.43	-1.23
down	LOC395689	ENO2	1	77236463	77245755	+	pcg	0	2.9	1.54	0.0068	0.43	-1.22
down	LOC424164	KLHL41	7	18282250	18292276	-	pcg	0.3016	0.77	-0.37	0.0013	0.43	-1.21
down	LOC418774	PCCA	1	143997224	144267939	-	pcg	0.2205	1.52	0.61	0.0337	0.44	-1.2
down	LOC421782	RTN4IP1	3	67804371	67824410	+	pcg	0.3991	0.81	-0.31	0.0016	0.44	-1.19
down	LOC427640	TRIM105	13	12943887	12949982	+	pcg	0.6583	0.87	-0.21	0.0107	0.44	-1.19
down	DAVISGALG000046775	DAVISGALG000046775	MU179258.1	74045	75188	+	pcg	0.0009	0.34	-1.55	0.0466	0.44	-1.18
down	LOC395653	HPRT1	4	3982516	4000204	+	pcg	0.3049	0.8	-0.32	0.0002	0.44	-1.18
down	LOC408182	CYB5R2	5	7067990	7087520	-	pcg	0.8305	1.09	0.12	0.0424	0.44	-1.18
down	LOC415701	FBXL8	11	2476906	2481038	+	pcg	0	2.55	1.35	0.0001	0.44	-1.18
down	LOC416641	TMEM186	14	10071842	10090865	+	pcg	0.8857	1.04	0.06	0.0021	0.44	-1.18
down	LOC100858579	LOC100858579	28	1690085	1692044	-	pcg	0.1249	0.63	-0.66	0.0175	0.44	-1.17
down	LOC415976	IQSEC1	12	5434304	5799824	-	pcg	0.0867	0.68	-0.56	0.0013	0.45	-1.17
down	LOC418973	CWF19L2	1	180504099	180566862	+	pcg	0.0004	2	1	0.0004	0.45	-1.17
down	LOC395891	CACNA1C	1	61191807	61664366	+	pcg	0.6365	1.15	0.2	0.0075	0.45	-1.16
down	LOC418270	FAM162A	1	76746417	76754190	+	pcg	0.4525	1.31	0.39	0.0387	0.45	-1.16
down	LOC428413	BAMBI	2	15224657	15229261	-	pcg	0.5976	0.83	-0.27	0.0318	0.45	-1.16
down	LOC772331	BEND2	1	120995564	121019290	-	pcg	0.7214	0.92	-0.12	0.0003	0.45	-1.16
down	LOC396333	PKIA	2	119939422	119978046	+	pcg	0.0001	3.12	1.64	0.0245	0.45	-1.15
down	LOC418113	RAB19	1	56816577	56823869	+	pcg	0	0.21	-2.24	0.0059	0.45	-1.15
down	LOC418164	MICAL3	1	61921934	62099619	-	pcg	0.7781	0.91	-0.13	0.0114	0.45	-1.15
down	LOC421904	ERICH1	3	91158595	91252619	+	pcg	0.8692	0.95	-0.08	0.0083	0.45	-1.15
down	LOC429115	MCCC2L	8	28448922	28460518	+	pcg	0.4241	1.31	0.39	0.0308	0.45	-1.15
down	LOC771849	CDA	21	4886432	4894799	+	pcg	0.0006	2.66	1.41	0.0265	0.45	-1.14
down	LOC416060	WDR6	12	11834903	11839472	-	pcg	0.069	1.74	0.8	0.0298	0.46	-1.13
down	LOC422547	ACSL1	4	38972617	39044796	+	pcg	0.0001	0.48	-1.07	0.0006	0.46	-1.13
down	LOC424149	MAP3K20	7	16970203	17053798	-	pcg	0.0524	0.65	-0.61	0.0014	0.46	-1.13
down	LOC772356	CADM3	25	2408126	2424258	+	pcg	0	8.66	3.11	0.0198	0.46	-1.13
down	LOC378899	FTL	5	11797157	11801008	+	pcg	0	0.3	-1.75	0.0012	0.46	-1.12
down	LOC421881	ZNF451	3	86455716	86496900	-	pcg	0.5676	1.11	0.15	0	0.46	-1.12
down	LOC416077	THOC7	12	13705103	13712850	-	pcg	0.0545	1.48	0.57	0.0007	0.46	-1.11
down	LOC427259	RFK	Z	37947459	37953709	-	pcg	0.029	1.66	0.73	0.0042	0.47	-1.1
down	LOC416788	ZDHHC8	15	1340971	1437811	+	pcg	0.0026	0.47	-1.1	0.0131	0.47	-1.09
down	LOC395863	HPGDS	4	36746784	36772199	-	pcg	0.1095	1.5	0.58	0.0089	0.47	-1.08
down	LOC420591	ISPD	2	28184591	28296806	-	pcg	0.767	1.1	0.14	0.0248	0.47	-1.08
down	LOC421405	PREPL	3	25157364	25197818	-	pcg	0.0057	0.54	-0.89	0.0048	0.47	-1.08
down	LOC421594	TCP11L1	5	6682415	6698984	-	pcg	0.0018	0.45	-1.14	0.0156	0.47	-1.08
down	LOC100858072	RNF150	4	29352806	29473020	-	pcg	0	3.2	1.68	0.0304	0.48	-1.07
down	LOC121113187	PLB1	3	26970307	27051017	-	pcg	0.2768	1.39	0.47	0.0294	0.48	-1.07
down	LOC396287	HMOX1	1	52145778	52151916	-	pcg	0.0001	2.68	1.42	0.0165	0.48	-1.07
down	LOC396500	REL	3	2114854	2148940	+	pcg	0.0008	0.62	-0.69	0	0.48	-1.07
down	LOC421198	PUS10	3	2150999	2185651	-	pcg	0	0.31	-1.69	0.024	0.48	-1.07
down	LOC768769	SNAPC3	1	45293487	45294896	+	pcg	0.5678	1.14	0.19	0.0012	0.48	-1.07
down	LOC418614	RAI2	1	120824900	120858267	-	pcg	0	15.41	3.95	0.0399	0.48	-1.06
down	DAVISGALG000030880	DAVISGALG000030880	5	21709884	21714003	+	pcg	0.3958	1.31	0.39	0.0384	0.48	-1.05
down	LOC423238	STARD9	5	25264090	25362298	+	pcg	0.0647	1.59	0.67	0.0123	0.48	-1.05
down	LOC427823	GUSB	19	5407584	5420023	-	pcg	0.7562	1.07	0.1	0.0003	0.48	-1.05
down	LOC100858692	SRXN1	20	10264774	10266286	+	pcg	0	4.23	2.08	0.0285	0.49	-1.04
down	LOC422353	LOC422353	4	14110790	14146877	+	pcg	0.8484	0.95	-0.07	0.0021	0.49	-1.04
down	LOC422386	CD99L2	4	17639675	17658831	+	pcg	0.1756	1.33	0.42	0.0019	0.49	-1.04
down	LOC424222	XRCC5	7	23121282	23165084	-	pcg	0.0002	1.94	0.96	0.0004	0.49	-1.04
down	LOC424495	FNBP1L	8	13601375	13654661	-	pcg	0.0005	0.37	-1.43	0.0447	0.49	-1.04
down	LOC418436	MINA	1	91509788	91536351	-	pcg	0.0099	0.58	-0.78	0.0034	0.49	-1.03
down	LOC421866	KCNQ5	3	81242885	81506409	-	pcg	0.1255	0.63	-0.66	0.0446	0.49	-1.02
down	LOC428994	CPS1	7	2837493	3015364	+	pcg	0.0522	1.72	0.78	0.0326	0.49	-1.02
down	LOC416789	PGAM5	15	1436881	1442969	+	pcg	0.2363	1.23	0.3	0.0001	0.5	-1.01
down	LOC415846	CBFA2T3	11	18169888	18191832	-	pcg	0	0.36	-1.47	0.0198	0.5	-0.99
down	LOC424435	TNN	8	7073638	7097679	-	pcg	0.277	0.75	-0.42	0.0225	0.5	-0.99
down	LOC374099	BIVM	1	142797090	142813717	-	pcg	0.0332	1.41	0.5	0.0002	0.51	-0.98
down	LOC418015	SYNGR1	1	50713266	50726975	-	pcg	0	2.82	1.5	0.0263	0.51	-0.98
down	LOC423573	L2HGDH	5	57531416	57547437	-	pcg	0.1598	1.35	0.43	0.0041	0.51	-0.98
down	LOC424687	DOCK7	8	27186513	27274541	-	pcg	0.007	1.7	0.77	0.0031	0.51	-0.98
down	LOC418902	SPG20	1	172499529	172515825	+	pcg	0	0	-9.81	0.0368	0.51	-0.97
down	LOC420234	PLEKHF2	2	126038095	126054883	+	pcg	0.0845	1.37	0.45	0.0008	0.51	-0.97
down	LOC428883	ARHGAP5	5	34102973	34221995	+	pcg	0.0041	0.63	-0.67	0.0002	0.51	-0.97
down	LOC418338	CHD1L	1	80589340	80611890	-	pcg	0.1076	1.47	0.55	0.0156	0.52	-0.96
down	LOC418566	NYX	1	112094297	112122493	-	pcg	0	3.93	1.98	0.0027	0.51	-0.96
down	LOC421797	COQ3	3	71202080	71208173	+	pcg	0.0034	1.79	0.84	0.0049	0.51	-0.96
down	LOC428569	SLC3A1	3	25166494	25180882	+	pcg	0	0.49	-1.03	0.0008	0.51	-0.96
down	LOC395853	HSPA8	24	3128643	3133770	+	pcg	0.9249	1.02	0.03	0.0007	0.52	-0.95
down	LOC416169	LOC416169	13	4340302	4382987	+	pcg	0.373	1.24	0.3	0.0096	0.52	-0.95
down	LOC419146	AHCY	20	1839195	1863308	+	pcg	0.2865	1.36	0.44	0.0444	0.52	-0.95
down	LOC771953	MRPL33	3	27333098	27338916	-	pcg	0.0117	0.65	-0.62	0.0008	0.52	-0.95
down	LOC395338	AKR1B10	1	62516804	62525580	-	pcg	0.0552	1.57	0.65	0.0188	0.52	-0.94
down	LOC415705	NECAB2	11	2552693	2604758	-	pcg	0.001	0.52	-0.95	0.0069	0.52	-0.94
down	LOC417899	MRPL42	1	44921671	44928855	+	pcg	0.5177	1.18	0.24	0.0193	0.52	-0.94
down	LOC423661	ARID5B	6	8955309	9099094	-	pcg	0.0056	1.9	0.92	0.0197	0.52	-0.94
down	LOC426435	PGM2	4	69315359	69332649	-	pcg	0.0195	1.47	0.56	0.0004	0.52	-0.94
down	LOC428401	ALS2L	2	3249888	3307493	-	pcg	0.391	1.25	0.32	0.0221	0.52	-0.94
down	DAVISGALG000031813	DAVISGALG000031813	5	33835317	33836767	+	pcg	0.8148	1.06	0.09	0.0111	0.52	-0.93
down	LOC121108713	HNRNPC	MU179261.1	246134	259507	+	pcg	0.0116	0.58	-0.79	0.0127	0.52	-0.93
down	LOC415454	HDC	10	10899713	10909094	+	pcg	0.0028	1.83	0.87	0.0077	0.53	-0.93
down	LOC416782	TXNRD2	15	1019066	1053022	-	pcg	0.6061	0.88	-0.18	0.0106	0.52	-0.93
down	LOC420552	LOC420552	2	22531642	22539457	+	pcg	0.0042	2.08	1.06	0.0441	0.52	-0.93
down	LOC420980	ELP2	2	88028672	88060957	-	pcg	0	2.29	1.2	0.0008	0.52	-0.93
down	LOC421779	C6orf203	3	67690261	67694437	-	pcg	0	0.21	-2.28	0.024	0.53	-0.93
down	LOC374136	IL1RL1	1	133981720	134004955	+	pcg	0.0016	2.11	1.07	0.0285	0.53	-0.92
down	LOC396118	LPAR6	1	168677264	168678696	-	pcg	0.0018	0.49	-1.04	0.0257	0.53	-0.92
down	LOC421750	TUBE1	3	65501680	65517034	+	pcg	0.0006	1.71	0.78	0.0004	0.53	-0.92
down	LOC422453	ZNF330	4	29498451	29509558	+	pcg	0.1802	1.36	0.44	0.0131	0.53	-0.92
down	LOC423673	TUBGCP2	6	10059108	10084500	-	pcg	0.0612	0.77	-0.38	0	0.53	-0.92
down	LOC426304	ANKRD46	2	128135034	128151205	-	pcg	0.0002	0.49	-1.02	0.0062	0.53	-0.92
down	LOC428457	CCR4	2	44319036	44325123	+	pcg	0.9366	1.03	0.04	0.0341	0.53	-0.92
down	LOC770613	GORAB	8	4888796	4897719	-	pcg	0.0062	1.47	0.55	0	0.53	-0.92
down	LOC395519	MAFF	1	51015566	51018675	-	pcg	0.0001	0.43	-1.23	0.0225	0.53	-0.91
down	LOC396534	PAICS	4	64253806	64288832	-	pcg	0.1953	0.78	-0.35	0.0019	0.53	-0.91
down	LOC421196	KIAA1841	3	2190096	2218578	+	pcg	0	0.39	-1.35	0.0062	0.53	-0.91
down	LOC425698	WDR73	1	194385207	194391465	-	pcg	0.7877	1.06	0.08	0.001	0.53	-0.91
down	LOC427318	MSH3	Z	64658489	64775849	-	pcg	0.0004	2.22	1.15	0.0239	0.53	-0.91
down	LOC417298	FCN2	17	948502	960105	+	pcg	0.2642	1.34	0.42	0.0326	0.54	-0.9
down	LOC418475	MRPL39	1	102595162	102604300	-	pcg	0.0496	1.66	0.73	0.0446	0.54	-0.9
down	LOC422644	UTP3	4	49528571	49530273	+	pcg	0.0045	0.69	-0.54	0	0.54	-0.9
down	LOC770094	ACAA1	2	4723194	4732182	-	pcg	0.7775	1.07	0.09	0.0046	0.54	-0.9
down	LOC424707	WLS	8	28408242	28431888	-	pcg	0.1352	0.68	-0.55	0.0395	0.54	-0.89
down	LOC100857197	LOC100857197	4	19809270	19858771	+	pcg	0	2.27	1.18	0.0141	0.54	-0.88
down	LOC415373	LACTB	10	4170784	4180328	-	pcg	0	2.57	1.36	0.0026	0.54	-0.88
down	LOC416986	PRKAB1	15	9645204	9650880	-	pcg	0	2.62	1.39	0.0005	0.54	-0.88
down	LOC420607	SP4	2	30313546	30339388	+	pcg	0	4.26	2.09	0.0011	0.54	-0.88
down	LOC422817	ADGRA3	4	73957754	74014266	+	pcg	0.8816	0.96	-0.07	0.0438	0.54	-0.88
down	LOC769451	ACD	11	1178644	1185952	-	pcg	0.8126	1.06	0.09	0.017	0.54	-0.88
down	LOC107049447	LOC107049447	1	121018309	121027119	+	pcg	0	0.2	-2.32	0.0204	0.55	-0.87
down	LOC419041	C12orf4	1	73463509	73489955	+	pcg	0	0.5	-1.01	0.0004	0.55	-0.87
down	LOC422762	DCUN1D4	4	65699551	65737624	-	pcg	0.0466	1.36	0.44	0.0004	0.55	-0.87
down	LOC423291	FAM98B	5	30198552	30210127	-	pcg	0.2009	1.24	0.31	0.001	0.55	-0.87
down	LOC423429	DDX24	5	44932280	44946767	-	pcg	0.9476	0.98	-0.03	0.014	0.55	-0.87
down	LOC416463	PSMG3	14	2627179	2630607	-	pcg	0.7642	0.92	-0.12	0.0369	0.55	-0.86
down	LOC416783	COMT	15	1052138	1071868	+	pcg	0.5212	1.13	0.17	0.0016	0.55	-0.86
down	LOC418830	MTRF1	1	165756904	165775326	-	pcg	0.0373	1.55	0.64	0.0174	0.55	-0.86
down	LOC422642	SDAD1	4	49490187	49504616	-	pcg	0	2.54	1.35	0.0073	0.55	-0.86
down	LOC770192	MIER2	28	2899176	2912167	-	pcg	0	0.35	-1.53	0.0069	0.55	-0.86
down	ENSGALG00010000037	ND6	MT	14962	15483	-	pcg	0.468	0.83	-0.28	0.0424	0.56	-0.85
down	LOC101748748	PLEKHM3	7	11631766	11764483	+	pcg	0.6885	1.1	0.14	0.0173	0.56	-0.85
down	LOC107052097	TMEM255A	4	16406714	16430923	+	pcg	0.7873	1.08	0.11	0.0361	0.56	-0.85
down	LOC395353	FKBP3	5	58557905	58562685	+	pcg	0.0031	0.65	-0.62	0.0004	0.56	-0.85
down	LOC419009	CHORDC1	1	187468003	187483755	+	pcg	0.9822	1	0.01	0.003	0.55	-0.85
down	LOC419687	FUCA1	23	5962509	5967186	-	pcg	0.0002	0.53	-0.92	0.0047	0.55	-0.85
down	LOC425485	SFMBT2	1	4467485	4583186	-	pcg	0.9863	1	-0.01	0.0234	0.55	-0.85
down	LOC396031	SMARCAL1	7	22961308	22996623	-	pcg	0.4831	1.18	0.24	0.0221	0.56	-0.84
down	LOC415883	MARVELD3	11	19475951	19477969	-	pcg	0.157	1.36	0.44	0.0186	0.56	-0.84
down	LOC419380	LRRC47	21	925674	930462	+	pcg	0.1646	1.34	0.43	0.0149	0.56	-0.84
down	LOC426812	ALDH7A1	Z	83629020	83647182	+	pcg	0.1305	1.29	0.37	0.0018	0.56	-0.84
down	LOC395784	CLIP1	15	5831085	5893016	-	pcg	0	0.39	-1.35	0.0052	0.56	-0.83
down	LOC416021	EEFSEC	12	9572889	9690092	-	pcg	0.8456	1.04	0.06	0.0042	0.56	-0.83
down	LOC419378	C1orf174	21	905580	907758	+	pcg	0.3533	1.25	0.32	0.0334	0.56	-0.83
down	LOC424089	WDR12	7	11591334	11598884	-	pcg	0.3874	1.19	0.25	0.0063	0.56	-0.83
down	LOC424138	MTX2	7	15830875	15863687	-	pcg	0.081	1.39	0.47	0.0071	0.56	-0.83
down	LOC427360	MPDZ	Z	31398868	31499022	-	pcg	0.2319	0.77	-0.38	0.0205	0.56	-0.83
down	LOC427723	RNFT2	15	11412978	11440850	-	pcg	0.3394	1.28	0.35	0.0462	0.56	-0.83
down	LOC428379	NUDCD1	2	131519740	131545824	-	pcg	0.0105	1.58	0.66	0.0065	0.56	-0.83
down	LOC770321	LYPLA1	2	110070141	110080386	-	pcg	0.7303	0.93	-0.1	0.0025	0.56	-0.83
down	LOC771906	IGSF6	14	8753905	8759438	-	pcg	0.0114	1.73	0.79	0.0283	0.56	-0.83
down	LOC396341	CCND1	5	17081391	17097705	+	pcg	0.8507	0.95	-0.08	0.0483	0.57	-0.82
down	LOC417169	TTF1	17	7126112	7134188	-	pcg	0.0322	1.35	0.43	0.0002	0.57	-0.82
down	LOC417469	TSPOAP1	19	966594	1030480	-	pcg	0	0.28	-1.82	0.002	0.57	-0.82
down	LOC417763	TSPAN12	1	23630806	23676052	+	pcg	0.0042	0.55	-0.88	0.029	0.57	-0.82
down	LOC418778	UBAC2	1	144561591	144658636	-	pcg	0.0791	1.34	0.42	0.0022	0.57	-0.82
down	LOC419002	TAF1D	1	185689261	185700123	+	pcg	0.075	0.74	-0.44	0.0034	0.57	-0.82
down	LOC420930	CCT5	2	78062068	78070098	-	pcg	0.7632	0.95	-0.08	0.0004	0.57	-0.82
down	LOC422055	ENPP4	3	109496427	109501831	+	pcg	0.0005	0.47	-1.1	0.0405	0.57	-0.82
down	LOC418612	PHKA2	1	120500496	120537541	+	pcg	0.0059	1.63	0.7	0.0075	0.57	-0.81
down	LOC420196	MRPL53	2	120948170	120952237	+	pcg	0.7079	1.07	0.1	0.0021	0.57	-0.81
down	LOC420568	PPP1R9A	2	23580679	23755396	+	pcg	0.0005	1.95	0.97	0.0173	0.57	-0.81
down	LOC421623	ZC3H12D	3	47784716	47797045	-	pcg	0.0247	0.6	-0.73	0.0415	0.57	-0.81
down	LOC427257	NMRK1	Z	37450069	37459211	-	pcg	0	2.48	1.31	0.0043	0.57	-0.81
down	LOC771852	PDRG1	20	10429977	10431537	-	pcg	0	2.35	1.23	0.0238	0.57	-0.81
down	LOC415410	RAB27A	10	8006764	8035433	+	pcg	0.6931	0.94	-0.09	0.0002	0.57	-0.8
down	LOC420593	ANKMY2	2	28361688	28382618	-	pcg	0	0.38	-1.38	0.0001	0.58	-0.8
down	LOC422485	C4orf33	4	33597930	33602402	-	pcg	0	3.23	1.69	0.0464	0.57	-0.8
down	LOC425342	TEX9	10	7674770	7705330	-	pcg	0.529	0.88	-0.18	0.009	0.58	-0.8
down	LOC426392	TMEM126A	1	190149827	190156881	+	pcg	0.3559	1.25	0.33	0.0436	0.58	-0.8
down	LOC416538	FAHD1	14	6055770	6056960	+	pcg	0	2.95	1.56	0.033	0.58	-0.79
down	LOC416836	HIP1R	15	5264419	5278779	-	pcg	0	3.66	1.87	0.0057	0.58	-0.79
down	LOC421020	SOCS6	2	93148584	93176550	-	pcg	0.0498	0.73	-0.45	0.0022	0.58	-0.79
down	LOC421137	NSMAF	2	111767968	111806672	-	pcg	0.0014	0.7	-0.52	0	0.58	-0.79
down	LOC424716	CTH	8	28740620	28756035	+	pcg	0.0314	0.65	-0.63	0.0222	0.58	-0.79
down	LOC415765	PDCD5	11	9498527	9502050	+	pcg	0	0.27	-1.88	0.0173	0.58	-0.78
down	LOC418082	TXNRD1	1	54632854	54659295	-	pcg	0	0.34	-1.55	0.0118	0.58	-0.78
down	LOC422539	PPA2	4	38315950	38352163	+	pcg	0.0002	1.68	0.75	0.0011	0.58	-0.78
down	LOC424052	GTF3C3	7	9595327	9615383	-	pcg	0.0016	1.87	0.9	0.026	0.58	-0.78
down	LOC424132	RBM45	7	15153133	15164177	-	pcg	0.3761	1.19	0.25	0.0113	0.58	-0.78
down	LOC415479	ABHD17C	10	12367500	12411733	-	pcg	0	0.24	-2.04	0.0491	0.59	-0.77
down	LOC417978	SOCS1L	1	49266449	49277379	+	pcg	0.3329	0.8	-0.32	0.0375	0.59	-0.77
down	LOC419836	RAB7L1	26	2314376	2320186	-	pcg	0.0247	0.72	-0.48	0.0017	0.59	-0.77
down	LOC420681	METTL6	2	41315435	41323456	+	pcg	0.8038	0.96	-0.07	0.0023	0.59	-0.77
down	LOC423236	LRRC57	5	25252525	25257987	-	pcg	0.3489	1.14	0.19	0.0003	0.59	-0.77
down	LOC424472	SLC35A3	8	11701750	11723038	-	pcg	0.3149	1.25	0.32	0.0326	0.59	-0.77
down	LOC427354	TTC39B	Z	32270465	32347178	-	pcg	0.9746	0.99	-0.01	0.0222	0.59	-0.77
down	LOC416429	SNN	14	920875	925473	-	pcg	0.0334	0.67	-0.57	0.0171	0.59	-0.76
down	LOC417796	IRAK4	1	30210222	30221544	+	pcg	0	2.1	1.07	0.0089	0.59	-0.76
down	LOC418887	MRPS31	1	170407855	170433124	+	pcg	0.5711	1.13	0.18	0.0191	0.59	-0.76
down	LOC420969	FH	2	85267730	85282102	-	pcg	0	2.06	1.04	0.0069	0.59	-0.76
down	LOC422302	NSDHL	4	11231433	11241992	-	pcg	0.8824	1.04	0.06	0.0462	0.59	-0.76
down	LOC422830	CC2D2A	4	76211558	76269088	-	pcg	0.5161	0.85	-0.23	0.0475	0.59	-0.76
down	LOC422845	TMEM128	4	78041864	78047533	-	pcg	0.3094	1.27	0.34	0.0469	0.59	-0.76
down	LOC425009	NMD3	9	21680100	21689650	+	pcg	0.573	1.12	0.17	0.0136	0.59	-0.76
down	LOC427207	GCNT4	Z	24644428	24662678	+	pcg	0.9847	1	0.01	0.0156	0.59	-0.76
down	LOC107057413	LOC107057413	23	102876	115550	-	pcg	0.4548	0.88	-0.19	0.0037	0.59	-0.75
down	LOC373888	TFAM	6	5889973	5895327	-	pcg	0.1937	1.29	0.37	0.0192	0.59	-0.75
down	LOC415991	TKTL1	12	7129421	7152024	-	pcg	0.0007	1.86	0.9	0.0221	0.59	-0.75
down	LOC416634	NUBP1	14	9128252	9202454	-	pcg	0.3078	1.19	0.25	0.0041	0.6	-0.75
down	LOC418967	NPAT	1	180192093	180213218	+	pcg	0.8095	1.04	0.06	0.0022	0.6	-0.75
down	LOC420796	NFX1	2	55025318	55102251	+	pcg	0.0004	0.56	-0.83	0.0084	0.59	-0.75
down	LOC422124	TMEM94	18	11420276	11467882	+	pcg	0.0001	0.62	-0.68	0.0001	0.59	-0.75
down	LOC422392	IDS	4	18010875	18040900	+	pcg	0.5082	1.17	0.23	0.0475	0.59	-0.75
down	LOC424529	C1orf52	8	16022621	16024654	+	pcg	0.0787	0.68	-0.55	0.0473	0.6	-0.75
down	LOC428417	LOC428417	2	15819975	15829861	+	pcg	0.9623	0.99	-0.02	0.0152	0.59	-0.75
down	LOC428737	PURG	4	34219846	34245596	-	pcg	0.0839	1.37	0.46	0.0136	0.59	-0.75
down	LOC100859211	USP40	7	5934115	5967909	+	pcg	0.0854	1.29	0.37	0.0022	0.6	-0.74
down	LOC395284	CASP8	7	11064313	11073955	+	pcg	0	2.61	1.39	0.0365	0.6	-0.74
down	LOC415596	GALK2	10	10479068	10527625	+	pcg	0	1.95	0.97	0.0105	0.6	-0.74
down	LOC415933	RAD54L2	12	2826252	2862723	-	pcg	0.6829	1.09	0.13	0.0221	0.6	-0.74
down	LOC418371	BLZF1	1	83935417	83942122	-	pcg	0.8427	0.97	-0.04	0.0002	0.6	-0.74
down	LOC420925	SNRNP48	2	77913028	77918635	+	pcg	0	3.83	1.94	0.01	0.6	-0.74
down	LOC421194	AHSA2	3	2271729	2280018	+	pcg	0.5224	1.11	0.15	0.0015	0.6	-0.74
down	LOC421342	MARK1	3	18335745	18391856	-	pcg	0.04	1.54	0.62	0.0454	0.6	-0.74
down	LOC423761	CUEDC2	6	17747401	17758417	-	pcg	0	0.47	-1.09	0.0161	0.6	-0.74
down	LOC396033	NFKB1	4	60304611	60362176	+	pcg	0	1.8	0.85	0.0003	0.6	-0.73
down	LOC417709	PUS7	1	14174936	14196868	+	pcg	0	1.84	0.88	0.0005	0.6	-0.73
down	LOC418942	MIPEP	1	177283380	177351659	+	pcg	0.9882	1	0	0.0288	0.6	-0.73
down	LOC419226	MTG2	20	8099527	8104160	+	pcg	0.2952	0.79	-0.33	0.0438	0.6	-0.73
down	LOC419422	FAM132A	21	2470251	2486558	+	pcg	0	3.54	1.82	0.0334	0.6	-0.73
down	LOC422492	SMIM19	4	33743737	33759531	+	pcg	0.7196	0.93	-0.11	0.0125	0.6	-0.73
down	LOC422792	UGDH	4	68772849	68794039	+	pcg	0.2359	1.29	0.37	0.038	0.6	-0.73
down	LOC423658	ZNF365	6	8874048	8890164	-	pcg	0.9345	1.02	0.03	0.0446	0.6	-0.73
down	LOC424661	DHCR24	8	24942711	24950879	-	pcg	0.4332	1.15	0.2	0.007	0.6	-0.73
down	LOC424890	DLG1	9	12164618	12296466	-	pcg	0.0347	1.37	0.46	0.0035	0.6	-0.73
down	LOC424933	COPS7B	9	15067957	15081589	+	pcg	0	2.21	1.15	0.0238	0.6	-0.73
down	LOC427163	PPWD1	Z	21121730	21136000	+	pcg	0.423	1.17	0.22	0.014	0.6	-0.73
down	LOC431607	PTAR1	Z	35404887	35440325	-	pcg	0.037	1.51	0.6	0.0347	0.6	-0.73
down	LOC101750812	CSF2RB	1	51582967	51594940	-	pcg	0	2.35	1.23	0.0302	0.61	-0.72
down	LOC418002	XPNPEP3	1	49928682	49945360	-	pcg	0	2.07	1.05	0.0151	0.61	-0.72
down	LOC418755	NAXD	1	139124510	139177365	+	pcg	0.0037	1.61	0.69	0.0118	0.61	-0.72
down	LOC420140	SIN3B	28	4709606	4723378	-	pcg	0.0091	1.52	0.6	0.0085	0.61	-0.72
down	LOC420536	DBF4	2	20736437	20752213	+	pcg	0	0.52	-0.93	0.0008	0.61	-0.72
down	LOC423585	ERO1A	5	57963936	57981470	-	pcg	0.7783	1.07	0.1	0.0474	0.61	-0.72
down	LOC426314	SUV39H2	1	8039132	8048882	+	pcg	0	0.42	-1.24	0.006	0.61	-0.72
down	LOC427084	C10orf88	6	32183240	32187132	-	pcg	0.1536	0.74	-0.44	0.0478	0.61	-0.72
down	LOC770857	LOC770857	20	5832853	5836603	-	pcg	0.0002	0.59	-0.75	0.0028	0.61	-0.72
down	LOC418917	HSPH1	1	174847379	174869372	+	pcg	0.0219	1.59	0.66	0.0446	0.61	-0.71
down	LOC419138	CEP250	20	1524654	1559116	-	pcg	0.0345	0.71	-0.49	0.009	0.61	-0.71
down	LOC420707	TMEM42	2	43092915	43098580	-	pcg	0.4223	0.84	-0.25	0.0398	0.61	-0.71
down	LOC424783	ZBTB38	9	9786882	9877484	+	pcg	0.004	0.67	-0.57	0.0021	0.61	-0.71
down	LOC395911	CD247	1	91785690	91832118	+	pcg	0.0018	0.57	-0.81	0.0292	0.61	-0.7
down	LOC415459	FAM103A1	10	11191972	11197555	+	pcg	0.193	1.18	0.24	0.0004	0.62	-0.7
down	LOC418750	TUBGCP3	1	137933181	137983748	+	pcg	0.3759	1.16	0.21	0.0059	0.61	-0.7
down	LOC420319	ZFAT	2	141537966	141624173	-	pcg	0.3101	0.85	-0.24	0.005	0.61	-0.7
down	LOC420575	C1GALT1	2	24592821	24607788	+	pcg	0	2.24	1.16	0.0041	0.62	-0.7
down	LOC420818	ALDH5A1	2	57542821	57553041	-	pcg	0.1879	0.82	-0.29	0.0032	0.61	-0.7
down	LOC422486	SCLT1	4	33565477	33626001	+	pcg	0	2.36	1.24	0.0074	0.62	-0.7
down	LOC422715	BDH2	4	60491748	60505849	-	pcg	0.4982	0.89	-0.16	0.005	0.61	-0.7
down	LOC424200	DNPEP	7	21801468	21807396	+	pcg	0.0215	1.57	0.65	0.0441	0.62	-0.7
down	LOC427269	AUH	Z	44819604	44931673	-	pcg	0.1486	1.3	0.38	0.0198	0.62	-0.7
down	LOC771078	ARL9	4	48763183	48769432	+	pcg	0.2506	1.2	0.26	0.0054	0.62	-0.7
down	LOC771173	TLR1B	4	69023529	69029651	+	pcg	0.0078	1.66	0.73	0.0394	0.62	-0.7
down	LOC100857412	TCTN3	6	36093401	36107937	+	pcg	0	0.52	-0.95	0.0016	0.62	-0.69
down	LOC101749375	NRIP1	1	98452594	98523447	-	pcg	0	0.45	-1.15	0.0221	0.62	-0.69
down	LOC107050670	ARHGAP33L6	16	119999	126818	+	pcg	0.0156	1.57	0.65	0.0347	0.62	-0.69
down	LOC416478	AP5Z1	14	4012133	4021828	+	pcg	0.0163	0.74	-0.43	0.0008	0.62	-0.69
down	LOC418165	PEX26	1	62101697	62107355	+	pcg	0.6036	1.12	0.17	0.047	0.62	-0.69
down	LOC418888	COG6	1	170777465	170828800	-	pcg	0.9213	1.02	0.03	0.01	0.62	-0.69
down	LOC419233	MRGBP	20	8666093	8671219	+	pcg	0.0601	1.29	0.36	0.0014	0.62	-0.69
down	LOC421586	TCP1	3	45271502	45279307	+	pcg	0.585	0.89	-0.16	0.0277	0.62	-0.69
down	LOC421686	IL20RA	3	54554208	54574952	+	pcg	0.9661	0.99	-0.02	0.0472	0.62	-0.69
down	LOC422354	RAB39B	4	14153980	14161050	+	pcg	0.0602	1.39	0.48	0.0204	0.62	-0.69
down	LOC424277	CCDC93	7	28495266	28528097	+	pcg	0	1.97	0.98	0.0174	0.62	-0.69
down	LOC415769	CEP89	11	9600838	9627584	-	pcg	0.0586	0.74	-0.44	0.0131	0.63	-0.68
down	LOC416579	SCNN1G	14	6987413	6997875	-	pcg	0	2.25	1.17	0.0089	0.63	-0.68
down	LOC417607	SHPK	19	7137459	7145537	+	pcg	0	1.59	0.67	0.0001	0.62	-0.68
down	LOC418865	CAB39L	1	169025270	169086923	-	pcg	0.0335	0.74	-0.44	0.004	0.62	-0.68
down	LOC419115	L3MBTL1	20	384595	422962	-	pcg	0	1.77	0.82	0.0031	0.62	-0.68
down	LOC421032	IMPA2	2	96859536	96879565	-	pcg	0.1249	1.32	0.4	0.0233	0.63	-0.68
down	LOC422035	BLK	3	107036625	107071749	+	pcg	0.4003	0.85	-0.24	0.0281	0.62	-0.68
down	LOC423245	ELMSAN1	5	25606516	25676852	+	pcg	0.195	0.84	-0.25	0.0014	0.62	-0.68
down	LOC423309	AP4S1	5	33823269	33839759	+	pcg	0.1715	1.25	0.33	0.0111	0.62	-0.68
down	LOC425991	PICALM	1	190247491	190310011	-	pcg	0.1481	1.23	0.3	0.0034	0.62	-0.68
down	LOC768406	STAT4	7	7538207	7577113	-	pcg	0.0681	0.7	-0.52	0.047	0.63	-0.68
down	LOC418470	SAMSN1	1	98252115	98402329	-	pcg	0.0724	1.39	0.47	0.0329	0.63	-0.67
down	LOC418698	MITD1	1	132613245	132617338	-	pcg	0.0019	1.56	0.64	0.0065	0.63	-0.67
down	LOC420558	CDK6	2	22606846	22740743	-	pcg	0.4443	0.86	-0.22	0.0381	0.63	-0.67
down	LOC421062	THOC1	2	101745958	101766211	+	pcg	0.9246	0.98	-0.03	0.0093	0.63	-0.67
down	LOC421456	ABCC10	3	30674986	30695860	-	pcg	0.0236	1.46	0.54	0.0198	0.63	-0.67
down	LOC421519	KCNK7	3	38351177	38381096	-	pcg	0.8126	0.95	-0.08	0.0381	0.63	-0.67
down	LOC423736	AP3M1	6	16152601	16169080	+	pcg	0.4668	1.13	0.18	0.0089	0.63	-0.67
down	LOC425211	DAPP1	4	59612185	59634123	+	pcg	0.7955	1.05	0.07	0.0109	0.63	-0.67
down	LOC100858913	SMAP1	3	82243311	82337380	-	pcg	0.9713	1.01	0.01	0.026	0.63	-0.66
down	LOC101752037	BTBD6	5	52261964	52265869	+	pcg	0	2.97	1.57	0.0111	0.63	-0.66
down	LOC373921	ZNF622	2	75373038	75379750	+	pcg	0.6242	0.94	-0.09	0.0004	0.63	-0.66
down	LOC418761	ARHGEF7	1	139315529	139423379	+	pcg	0.0142	0.65	-0.62	0.0315	0.63	-0.66
down	LOC419574	C2	23	2142468	2148760	-	pcg	0	2.06	1.04	0.0363	0.63	-0.66
down	LOC420619	CCDC126	2	31213306	31225704	+	pcg	0.0705	1.24	0.31	0.0005	0.63	-0.66
down	LOC415732	ADCY7	11	6169599	6228457	-	pcg	0.0026	1.57	0.65	0.0124	0.64	-0.65
down	LOC415782	GARRE1	11	10538877	10592383	-	pcg	0.5755	1.12	0.16	0.0349	0.64	-0.65
down	LOC418339	FAAHL	1	80611203	80629403	+	pcg	0.9503	1.01	0.02	0.0208	0.64	-0.65
down	LOC419118	AAR2	20	567262	605159	+	pcg	0.0206	1.49	0.58	0.031	0.64	-0.65
down	LOC421599	QSER1	5	5812660	5850604	+	pcg	0.0765	0.72	-0.47	0.0402	0.64	-0.65
down	LOC424892	BDH1B	9	12335699	12353130	+	pcg	0.0911	0.8	-0.33	0.0029	0.64	-0.65
down	LOC424962	MCCC1	9	16091148	16107057	+	pcg	0.3024	1.22	0.29	0.0427	0.64	-0.65
down	LOC769329	LOC769329	18	10746162	10751644	+	pcg	0.0423	1.36	0.44	0.0107	0.64	-0.65
down	LOC395383	SLC16A3	18	5491314	5501268	-	pcg	0.0009	1.69	0.76	0.0232	0.64	-0.64
down	LOC417783	DNAJB9	1	28580369	28588869	-	pcg	0.0001	0.6	-0.74	0.0075	0.64	-0.64
down	LOC418821	DIS3	1	156162072	156182933	+	pcg	0.9921	1	0	0.0258	0.64	-0.64
down	LOC420229	DPY19L4	2	125862867	125892567	+	pcg	0.0656	1.33	0.42	0.0151	0.64	-0.64
down	LOC421312	CHGB	3	16491248	16587353	+	pcg	0.0033	1.59	0.67	0.0208	0.64	-0.64
down	LOC101750175	PTCHD3	2	15775894	15782337	+	pcg	0.7139	1.07	0.1	0.0278	0.64	-0.63
down	LOC415322	SENP8	10	1590072	1597497	+	pcg	0.1407	0.8	-0.32	0.0098	0.65	-0.63
down	LOC417539	NIPSNAP2	19	5340289	5354322	+	pcg	0.015	0.74	-0.43	0.0022	0.65	-0.63
down	LOC420337	NDUFB9	2	137482733	137485971	+	pcg	0.0003	1.73	0.79	0.0188	0.65	-0.63
down	LOC421380	RCOR3	3	21980694	22007104	-	pcg	0.7205	1.06	0.09	0.0124	0.65	-0.63
down	LOC421511	GPR137B	3	37483815	37508815	-	pcg	0.1825	1.26	0.33	0.0248	0.65	-0.63
down	LOC421547	C1orf131	3	40349415	40360853	-	pcg	0.4831	1.14	0.18	0.0269	0.65	-0.63
down	LOC427285	GNE	Z	52737274	52774520	-	pcg	0.7735	0.95	-0.08	0.0196	0.65	-0.63
down	LOC100859600	C3orf33	9	22673907	22677829	+	pcg	0.011	1.44	0.52	0.0109	0.65	-0.62
down	LOC418541	NDUFV3	1	109677386	109684469	+	pcg	0.0135	1.38	0.46	0.0043	0.65	-0.62
down	LOC420474	ZNF438	2	14502340	14545191	+	pcg	0.1133	0.75	-0.42	0.0468	0.65	-0.62
down	LOC421823	RARS2	3	76112297	76151587	+	pcg	0.0967	1.33	0.41	0.0354	0.65	-0.62
down	LOC424100	ZDBF2	7	12150873	12165532	-	pcg	0.0752	1.29	0.36	0.0073	0.65	-0.62
down	LOC426427	KATNIP	14	11900554	11966650	-	pcg	0.2552	0.81	-0.3	0.0424	0.65	-0.62
down	LOC427148	GPBP1	Z	18060396	18098308	+	pcg	0	2.17	1.12	0.0149	0.65	-0.62
down	LOC107049063	POLR2J	19	4653122	4654416	-	pcg	0.0213	1.46	0.55	0.0364	0.66	-0.61
down	LOC395414	CCT4	3	15033060	15039689	+	pcg	0.1227	1.21	0.28	0.0025	0.66	-0.61
down	LOC416942	SMPD4	15	8331163	8347111	-	pcg	0.9367	0.98	-0.03	0.0417	0.66	-0.61
down	LOC417184	FUBP3	17	6517311	6554406	+	pcg	0.4363	1.15	0.21	0.0385	0.66	-0.61
down	LOC417457	MKS1	19	677987	689639	-	pcg	0.0005	1.59	0.67	0.0093	0.66	-0.61
down	LOC417733	ALG12	1	19055339	19099213	-	pcg	0.0478	1.41	0.49	0.0402	0.65	-0.61
down	LOC419450	PGD	21	3715700	3725351	+	pcg	0.0006	0.64	-0.65	0.0078	0.66	-0.61
down	LOC422066	MRPL19	3	110576039	110582400	+	pcg	0.0564	1.35	0.43	0.021	0.65	-0.61
down	LOC422941	DDRGK1	4	88333428	88363560	-	pcg	0.0782	1.28	0.36	0.0095	0.66	-0.61
down	LOC768416	LOC768416	6	273277	280918	+	pcg	0.3228	0.83	-0.27	0.0478	0.65	-0.61
down	LOC768655	PIM3	1	19361677	19366025	-	pcg	0	1.76	0.82	0.0101	0.66	-0.61
down	LOC415462	TM6SF1	10	11230083	11257340	+	pcg	0.0325	1.44	0.53	0.0453	0.66	-0.6
down	LOC417864	NAP1L1	1	38038675	38067791	-	pcg	0.7613	0.96	-0.07	0.0039	0.66	-0.6
down	LOC420647	SATB1	2	35078144	35169743	-	pcg	0.0597	0.74	-0.43	0.026	0.66	-0.6
down	LOC420866	BLOC1S5	2	64051424	64064910	+	pcg	0.0196	1.39	0.47	0.0114	0.66	-0.6
down	LOC421781	QRSL1	3	67792326	67804277	-	pcg	0.6913	0.94	-0.09	0.0084	0.66	-0.6
down	LOC421938	NOL10	3	96551957	96596903	-	pcg	0.1116	1.27	0.34	0.0168	0.66	-0.6
down	LOC423239	CDAN1	5	25355061	25392302	-	pcg	0.2715	0.82	-0.29	0.0461	0.66	-0.6
down	LOC423479	EIF5	5	49724270	49731755	+	pcg	0.3615	1.14	0.19	0.0055	0.66	-0.6
down	LOC770021	REEP5	Z	46658186	46678718	+	pcg	0.3299	1.14	0.19	0.005	0.66	-0.6
down	LOC416742	NDUFAF5	3	12280826	12286123	-	pcg	0.0443	0.73	-0.45	0.0272	0.66	-0.59
down	LOC417934	ARL1	1	47749907	47755347	-	pcg	0.0001	0.63	-0.67	0.0045	0.66	-0.59
down	LOC418764	LIG4	1	140238778	140242673	+	pcg	0.2433	1.21	0.28	0.027	0.66	-0.59
down	LOC422684	METTL14	4	54492812	54516443	-	pcg	0.5333	0.9	-0.15	0.0209	0.66	-0.59
down	LOC423000	MRPL21	5	1615934	1633091	-	pcg	0.4057	1.15	0.2	0.0273	0.67	-0.59
down	LOC423723	PPIF	6	13026124	13034057	-	pcg	0.1806	1.26	0.34	0.0419	0.66	-0.59
down	LOC425237	RRP1B	1	110110638	110132885	+	pcg	0.9514	1.01	0.01	0.0005	0.66	-0.59
down	LOC427395	MCCC2	Z	73633883	73669969	+	pcg	0.0133	0.67	-0.59	0.043	0.66	-0.59
down	LOC770884	ARFIP1	4	33463483	33504256	+	pcg	0.3856	0.91	-0.14	0.0004	0.67	-0.59
down	LOC771315	CRCBL	1	51600449	51613192	-	pcg	0.0001	1.9	0.92	0.0497	0.67	-0.59
down	LOC374120	PPARA	1	71081359	71359919	+	pcg	0.001	1.68	0.75	0.0423	0.67	-0.58
down	LOC395436	USPL1	1	174934378	174950813	-	pcg	0	0.66	-0.6	0.0003	0.67	-0.58
down	LOC396518	CD3D	24	5513856	5516395	-	pcg	0.0984	0.78	-0.35	0.0202	0.67	-0.58
down	LOC415752	UQCRFS1	11	7760244	7763596	-	pcg	0	0.3	-1.75	0.0265	0.67	-0.58
down	LOC418261	FKBP4	1	75684236	75698363	-	pcg	0.4871	1.13	0.17	0.0313	0.67	-0.58
down	LOC418299	PEX5	1	77382768	77393785	+	pcg	0.0001	0.59	-0.76	0.0187	0.67	-0.58
down	LOC419384	TPRG1L	21	981463	984758	-	pcg	0.0782	1.3	0.38	0.0203	0.67	-0.58
down	LOC420195	PAG1	2	120789835	120900713	-	pcg	0.9707	0.99	-0.01	0.0476	0.67	-0.58
down	LOC422446	SCOC	4	29205983	29214510	+	pcg	0	0.57	-0.81	0.0107	0.67	-0.58
down	LOC423738	NDST2	6	16465627	16593873	+	pcg	0.2748	1.19	0.25	0.0268	0.67	-0.58
down	LOC425350	MED28	4	75499795	75502839	-	pcg	0.6222	0.92	-0.12	0.0231	0.67	-0.58
down	LOC428559	CRLS1	3	16619903	16624669	+	pcg	0.0005	0.63	-0.66	0.0107	0.67	-0.58
down	LOC771400	DIP2A	7	6968238	7080552	-	pcg	0.3864	0.87	-0.19	0.0168	0.67	-0.58
down	LOC771447	SRM	21	4107179	4114305	-	pcg	0.8043	0.96	-0.06	0.0288	0.67	-0.58
down	LOC415352	SCAPER	10	3229119	3371405	+	pcg	0.3549	0.86	-0.22	0.0334	0.68	-0.57
down	LOC416124	PLXND1	12	19705759	19772289	-	pcg	0.497	1.12	0.16	0.0272	0.67	-0.57
down	LOC420218	DECR1	2	123980051	123995050	+	pcg	0.9167	1.02	0.03	0.0461	0.67	-0.57
down	LOC420488	ACBD5	2	15874953	15902092	-	pcg	0.0008	0.7	-0.52	0.0017	0.68	-0.57
down	LOC421597	HIPK3	5	6549011	6638706	-	pcg	0.3458	0.89	-0.17	0.0021	0.68	-0.57
down	LOC421967	LDAH	3	101764338	101872765	-	pcg	0	0.41	-1.3	0.017	0.68	-0.57
down	LOC422038	FDFT1	3	107159522	107170589	+	pcg	0.3437	1.14	0.19	0.0095	0.67	-0.57
down	LOC423019	TALDO1	5	671272	676335	-	pcg	0.0002	1.66	0.73	0.0202	0.67	-0.57
down	LOC424162	PPIG	7	18239551	18264366	-	pcg	0.7683	0.95	-0.07	0.0167	0.67	-0.57
down	LOC424891	BDH1A	9	12322026	12335637	-	pcg	0	0.57	-0.8	0.0012	0.67	-0.57
down	LOC427502	TRPM7	10	10794704	10847932	+	pcg	0	3.15	1.65	0.0187	0.67	-0.57
down	LOC770756	GRAP2	1	50338727	50378532	-	pcg	0.3254	0.84	-0.25	0.044	0.67	-0.57
down	LOC107057415	LOC107057415	23	6183846	6196215	+	pcg	0.1986	0.82	-0.28	0.0225	0.68	-0.56
down	LOC112532911	LOC112532911	8	29524773	29527018	+	pcg	0.0013	0.63	-0.67	0.0286	0.68	-0.56
down	LOC395996	BLMH	19	6709237	6724630	-	pcg	0.7361	1.05	0.07	0.0038	0.68	-0.56
down	LOC396061	FASN	18	5537180	5573293	+	pcg	0.2305	1.18	0.24	0.0131	0.68	-0.56
down	LOC396062	CD3E	24	5503915	5511817	+	pcg	0.0216	0.75	-0.42	0.0089	0.68	-0.56
down	LOC415121	CYP4V2	4	60874609	60887521	+	pcg	0.8908	1.03	0.04	0.0407	0.68	-0.56
down	LOC415364	TBC1D2B	10	3845896	3887742	+	pcg	0.0018	1.45	0.54	0.0068	0.68	-0.56
down	LOC415442	C10H15ORF48	10	10690293	10693905	+	pcg	0	0.35	-1.54	0.02	0.68	-0.56
down	LOC416952	BCR	15	8578290	8684843	-	pcg	0.0514	1.36	0.45	0.0424	0.68	-0.56
down	LOC418602	SMS	1	119103016	119147615	-	pcg	0	0.36	-1.46	0.0234	0.68	-0.56
down	LOC418958	PARP4	1	179114439	179159859	-	pcg	0.9496	0.99	-0.02	0.0133	0.68	-0.56
down	LOC419454	EXOSC10	21	4114538	4128664	-	pcg	0.9279	1.02	0.02	0.0131	0.68	-0.56
down	LOC428860	APIP	5	18386080	18399163	-	pcg	0.0002	1.76	0.81	0.0464	0.68	-0.56
down	LOC770790	TMEM167A	Z	63690079	63782958	+	pcg	0.1426	1.23	0.3	0.0142	0.68	-0.56
down	LOC374079	OPTN	1	7280547	7300290	+	pcg	0.1405	1.19	0.25	0.0039	0.68	-0.55
down	LOC395099	CREB1	7	11802140	11840037	-	pcg	0.2339	0.86	-0.21	0.0052	0.68	-0.55
down	LOC415792	NAE1	11	10951854	10981963	+	pcg	0.0027	0.63	-0.66	0.0469	0.68	-0.55
down	LOC418192	GOLT1B	1	65396567	65409152	+	pcg	0.9108	0.98	-0.03	0.0113	0.68	-0.55
down	LOC418633	OFD1	1	123059529	123088803	-	pcg	0.0001	1.58	0.66	0.0084	0.68	-0.55
down	LOC418664	AKAP17A	1	129148639	129158970	-	pcg	0.0601	0.8	-0.33	0.0057	0.68	-0.55
down	LOC420451	ESYT2	2	9471785	9541912	-	pcg	0	1.65	0.72	0.0061	0.68	-0.55
down	LOC420889	EXOC2	2	66236458	66602522	-	pcg	0.2509	1.17	0.23	0.0139	0.68	-0.55
down	LOC421717	NCOA7	3	59414066	59499575	-	pcg	0.0007	0.62	-0.68	0.0275	0.68	-0.55
down	LOC421804	UFL1	3	72502582	72524199	-	pcg	0.6655	1.06	0.08	0.0034	0.68	-0.55
down	LOC422114	MRPL58	18	11246671	11249393	+	pcg	0	2.27	1.18	0.0321	0.68	-0.55
down	LOC423353	NPC2	5	37435071	37437225	+	pcg	0.001	1.59	0.67	0.0319	0.68	-0.55
down	LOC423504	HSPA2	5	52384623	52386942	-	pcg	0.0001	0.55	-0.87	0.0477	0.68	-0.55
down	LOC424458	RNPC3	8	10802797	10817319	-	pcg	0.2351	1.21	0.28	0.0375	0.68	-0.55
down	LOC424487	ABCD3	8	13282647	13309798	-	pcg	0.6488	0.94	-0.09	0.005	0.68	-0.55
down	LOC427118	RFESD	Z	58222126	58224947	-	pcg	0.0103	0.75	-0.41	0.0033	0.68	-0.55
down	LOC427176	MTX3	Z	22598223	22608901	+	pcg	0.0001	1.69	0.76	0.0218	0.68	-0.55
down	LOC427331	INIP	Z	66624886	66636095	+	pcg	0.4697	1.12	0.16	0.0222	0.68	-0.55
down	LOC427854	ATP6AP1	1	22511364	22565151	+	pcg	0.3162	1.17	0.23	0.0308	0.68	-0.55
down	LOC100858462	SYTL3	3	51764074	51793911	+	pcg	0	0.65	-0.63	0.0016	0.69	-0.54
down	LOC378918	TRAM1L1	2	116449412	116463492	-	pcg	0.2395	0.84	-0.25	0.0255	0.69	-0.54
down	LOC396435	TPI1	1	77223631	77226616	+	pcg	0.1184	1.26	0.33	0.0327	0.69	-0.54
down	LOC416844	KDM2B	15	5490760	5595628	-	pcg	0.2049	0.84	-0.26	0.0196	0.69	-0.54
down	LOC417347	SEPTIN9	18	4364018	4459176	+	pcg	0.0284	0.72	-0.47	0.039	0.69	-0.54
down	LOC421386	TRERF1	3	22555000	22658036	-	pcg	0	2.05	1.03	0.0438	0.69	-0.54
down	LOC421924	KIDINS220	3	95570082	95629814	-	pcg	0	1.77	0.82	0.0215	0.69	-0.54
down	LOC422514	HERC3	4	34624936	34668822	+	pcg	0.0451	0.85	-0.24	0	0.69	-0.54
down	LOC424803	DOCK10	9	8173859	8313692	-	pcg	0.5848	1.09	0.13	0.0295	0.69	-0.54
down	LOC426366	CDC123	1	6916395	6954045	+	pcg	0.0019	0.68	-0.55	0.0119	0.69	-0.54
down	LOC769893	BRAT1	14	3343795	3351819	+	pcg	0	0.6	-0.74	0.0011	0.69	-0.54
down	LOC421144	GGH	2	113492749	113506451	-	pcg	0	2.59	1.37	0.0289	0.69	-0.53
down	LOC421197	PEX13	3	2185486	2192582	+	pcg	0.0151	0.73	-0.45	0.0153	0.69	-0.53
down	LOC421902	CLN8	3	90663462	90678053	-	pcg	0.7446	1.05	0.07	0.0169	0.69	-0.53
down	LOC427328	CCNH	Z	61698337	61706058	+	pcg	0.5347	1.11	0.15	0.0424	0.69	-0.53
down	LOC428411	PFKP	2	11363362	11404927	+	pcg	0.1153	1.24	0.32	0.0236	0.69	-0.53
down	LOC374273	SURF4	17	7483252	7496507	-	pcg	0.0028	1.44	0.53	0.0162	0.7	-0.52
down	LOC395257	CBFB	11	2365141	2407643	+	pcg	0.7909	1.05	0.07	0.045	0.7	-0.52
down	LOC396203	NPM1	13	2910427	2921634	-	pcg	0.9606	1.01	0.01	0.0132	0.7	-0.52
down	LOC415995	SELENOK	12	7423175	7427226	-	pcg	0.0044	0.67	-0.58	0.0442	0.7	-0.52
down	LOC416205	ERGIC1	13	8691912	8751602	+	pcg	0.1866	1.19	0.25	0.0141	0.7	-0.52
down	LOC420644	OXNAD1	2	34201542	34220475	+	pcg	0	0.58	-0.78	0.0233	0.7	-0.52
down	LOC429010	FAM126B	7	10956884	11011730	-	pcg	0.0001	0.63	-0.67	0.0113	0.7	-0.52
down	LOC619530	EXOSC9	4	53457002	53462466	-	pcg	0	0.56	-0.84	0.0221	0.7	-0.52
down	LOC395855	CALM2	3	26823614	26836145	-	pcg	0.7626	0.96	-0.06	0.0107	0.7	-0.51
down	LOC418977	MSANTD4	1	181002860	181015142	+	pcg	0.0001	0.58	-0.78	0.0418	0.7	-0.51
down	LOC420348	C2H8ORF76	2	136971096	136999400	-	pcg	0.0916	0.8	-0.32	0.0198	0.7	-0.51
down	LOC422786	N4BP2	4	68542536	68597494	-	pcg	0	0.49	-1.04	0.0118	0.7	-0.51
down	LOC427367	IFT74	Z	69100278	69132213	+	pcg	0.0611	1.3	0.37	0.0331	0.7	-0.51
down	LOC428908	WDR25	5	48092352	48151454	+	pcg	0.608	0.93	-0.1	0.0136	0.7	-0.51
down	LOC776599	MPLKIP	2	49972524	49980149	-	pcg	0.0059	0.73	-0.46	0.011	0.7	-0.51
down	LOC107053202	TMEM192	4	23237266	23257212	-	pcg	0.0247	0.73	-0.45	0.0409	0.71	-0.5
down	LOC421280	VPS54	3	9762364	9805229	-	pcg	0.0257	0.77	-0.38	0.0131	0.71	-0.5
down	LOC422596	THAP6	4	45899856	45905100	-	pcg	0.6654	1.07	0.1	0.029	0.71	-0.5
down	LOC423199	PHF21A	5	23282697	23429101	+	pcg	0.0005	0.69	-0.54	0.0071	0.71	-0.5
down	LOC423404	NRDE2	5	43332279	43357124	-	pcg	0.1381	0.85	-0.23	0.0046	0.71	-0.5
down	LOC424437	CACYBP	8	7100139	7106779	-	pcg	0.8793	0.98	-0.03	0.0011	0.71	-0.5
down	LOC426045	TBL1X	1	125335592	125535536	-	pcg	0.729	1.05	0.07	0.0145	0.71	-0.5
down	LOC771904	PFN2	9	23459531	23464683	+	pcg	0.6296	1.08	0.11	0.0337	0.71	-0.5
down	LOC121111419	LOC121111419	8	24168961	24172339	-	pcg	0.2325	1.18	0.24	0.0352	0.71	-0.49
down	LOC416103	TRNT1	12	18288034	18291667	+	pcg	0.0369	1.23	0.29	0.0022	0.71	-0.49
down	LOC417706	PIK3CG	1	14594616	14629783	+	pcg	0	2.72	1.44	0.0318	0.71	-0.49
down	LOC418852	LCP1	1	167910600	167959913	-	pcg	0.3955	1.14	0.19	0.0426	0.71	-0.49
down	LOC422726	FRG1BP	4	62279846	62287794	+	pcg	0.0008	0.71	-0.49	0.005	0.71	-0.49
down	LOC425313	RNF146	3	58886318	58896855	-	pcg	0.1364	0.85	-0.23	0.0041	0.71	-0.49
down	LOC426850	SEC11C	Z	1228419	1233541	+	pcg	0.7436	0.95	-0.07	0.0161	0.71	-0.49
down	LOC396549	ATP1B3	9	9973117	9995638	+	pcg	0.0001	1.69	0.76	0.047	0.72	-0.48
down	LOC396550	SCP2	8	24221653	24233804	+	pcg	0.0003	0.69	-0.54	0.0084	0.72	-0.48
down	LOC415350	RCN2	10	3217568	3229015	-	pcg	0.8536	1.03	0.04	0.0478	0.72	-0.48
down	LOC416261	MFAP3	13	11868255	11878274	-	pcg	0.9222	0.99	-0.02	0.0078	0.72	-0.48
down	LOC417090	ZBTB34	17	10864479	10876870	+	pcg	0.365	1.13	0.18	0.0277	0.72	-0.48
down	LOC418646	DMTF1	1	8083881	8112305	-	pcg	0.0001	0.6	-0.75	0.0464	0.72	-0.48
down	LOC422647	MOB1B	4	49596048	49635344	+	pcg	0.4593	1.11	0.15	0.0333	0.72	-0.48
down	LOC423772	FAM21C	6	18548213	18580937	-	pcg	0.0042	0.71	-0.49	0.0231	0.72	-0.48
down	LOC423803	FRA10AC1	6	21124114	21152728	+	pcg	0.0031	1.42	0.5	0.0194	0.71	-0.48
down	LOC425017	MFSD1	9	22116913	22148152	-	pcg	0.2145	0.84	-0.25	0.036	0.72	-0.48
down	LOC426815	SECISBP2	Z	44168664	44199161	+	pcg	0.5428	0.92	-0.12	0.0198	0.72	-0.48
down	LOC426970	CASP9	21	4915770	4922173	+	pcg	0.2472	1.18	0.24	0.0466	0.72	-0.48
down	LOC431564	ATP5F1AW	W	2351102	2419564	-	pcg	0.2797	1.16	0.22	0.0385	0.72	-0.48
down	LOC416278	HMGXB3	13	12897600	12916593	-	pcg	0.3133	0.86	-0.21	0.0494	0.72	-0.47
down	LOC416936	DDX51	15	8096835	8105351	+	pcg	0	0.67	-0.58	0.0051	0.72	-0.47
down	LOC418071	POLR3B	1	53857610	53925039	-	pcg	0	0.54	-0.89	0.0376	0.72	-0.47
down	LOC421514	LYST	3	37584208	37687999	+	pcg	0	0.48	-1.05	0.032	0.72	-0.47
down	LOC421620	STXBP5	3	46787965	46893689	+	pcg	0.7812	1.04	0.06	0.0414	0.72	-0.47
down	LOC422099	ABCC3	18	10773293	10816902	-	pcg	0	0.37	-1.42	0.0478	0.72	-0.47
down	LOC422387	MTMR1	4	17659513	17693544	-	pcg	0.7772	1.05	0.06	0.0419	0.72	-0.47
down	LOC769118	GABARAPL1	1	78459943	78469878	-	pcg	0.0085	0.8	-0.32	0.001	0.72	-0.47
down	LOC772152	DNLZ	17	8523462	8530158	+	pcg	0	0.41	-1.29	0.0398	0.72	-0.47
down	LOC395174	MTF2	8	13724937	13751840	-	pcg	0	0.47	-1.1	0.0447	0.73	-0.46
down	LOC416161	CCNG1	13	6346344	6351959	-	pcg	0	1.65	0.72	0.0092	0.73	-0.46
down	LOC418286	PTMS	1	77127877	77131347	+	pcg	0.6074	0.93	-0.11	0.0326	0.72	-0.46
down	LOC418497	C21orf59	1	105092338	105099678	-	pcg	0.5262	1.1	0.13	0.0444	0.73	-0.46
down	LOC418823	TDRD3	1	162086379	162190757	-	pcg	0.9576	1.01	0.01	0.045	0.73	-0.46
down	LOC419592	RSRP1	23	2761974	2766891	+	pcg	0.8629	0.97	-0.04	0.0297	0.73	-0.46
down	LOC420223	RBM12B	2	125438565	125445074	-	pcg	0.9762	1	-0.01	0.0232	0.73	-0.46
down	LOC421793	USP45	3	71115780	71170159	+	pcg	0	0.7	-0.52	0.0021	0.72	-0.46
down	LOC423378	AHSA1	5	38740319	38745797	+	pcg	0.4357	0.92	-0.12	0.0037	0.72	-0.46
down	LOC426852	PCASP1	Z	1137316	1170576	+	pcg	0.1252	0.82	-0.29	0.0355	0.73	-0.46
down	LOC768942	LONP1	28	1092580	1108459	-	pcg	0	1.69	0.75	0.024	0.73	-0.46
down	LOC420655	NGLY1	2	37822793	37842248	-	pcg	0.4461	1.11	0.15	0.0318	0.73	-0.45
down	LOC424286	MGAT5	7	29842221	29953595	+	pcg	0.0006	1.49	0.57	0.0298	0.73	-0.45
down	LOC427034	HIKESHI	1	190388869	190397780	-	pcg	0.5038	0.92	-0.13	0.0253	0.73	-0.45
down	LOC395685	WSB1	19	9581185	9588657	+	pcg	0.6615	1.06	0.08	0.0222	0.74	-0.44
down	LOC415823	MTHFSD	11	17013949	17027812	+	pcg	0.2951	0.87	-0.2	0.0432	0.74	-0.44
down	LOC416026	ABTB1	12	9852793	9879970	-	pcg	0.0056	1.39	0.47	0.033	0.74	-0.44
down	LOC418262	ITFG2	1	75663072	75679579	-	pcg	0.0055	1.32	0.4	0.0122	0.74	-0.44
down	LOC421557	C6orf120	3	40830472	40834944	-	pcg	0	0.57	-0.82	0.0221	0.73	-0.44
down	LOC423296	AQR	5	31701809	31751230	+	pcg	0.841	1.03	0.04	0.0221	0.74	-0.44
down	LOC423441	ATG2A	5	45921740	45966112	-	pcg	0	0.55	-0.87	0.0183	0.74	-0.44
down	LOC423632	CSGALNACT2	6	5441170	5471589	-	pcg	0.0012	0.72	-0.47	0.0126	0.74	-0.44
down	LOC424293	UBXN4	7	30252215	30265893	+	pcg	0.3877	0.92	-0.13	0.0038	0.74	-0.44
down	LOC427443	NUP155	Z	12085100	12116431	-	pcg	0.0365	0.8	-0.31	0.0122	0.74	-0.44
down	LOC430115	PSMF1	20	10209937	10215711	-	pcg	0.8849	1.02	0.02	0.0056	0.74	-0.44
down	LOC771996	CIPC	5	38576150	38590343	+	pcg	0.556	1.08	0.12	0.0377	0.74	-0.44
down	LOC419169	ACTR5	20	4092106	4110511	+	pcg	0.5413	1.08	0.11	0.0192	0.74	-0.43
down	LOC421530	SPRTN	3	39434483	39439252	-	pcg	0	0.56	-0.85	0.0481	0.74	-0.43
down	LOC421791	CCNC	3	71093192	71111048	+	pcg	0.0599	1.25	0.32	0.033	0.74	-0.43
down	LOC422303	CETN1	4	11242317	11246712	+	pcg	0.979	1	-0.01	0.0451	0.74	-0.43
down	LOC422788	RFC1	4	68833451	68871520	+	pcg	0.0118	0.78	-0.35	0.0106	0.74	-0.43
down	LOC424299	SPOPL	7	30983023	31024018	+	pcg	0.0699	0.82	-0.29	0.0229	0.74	-0.43
down	LOC428002	ZRSR2	1	121988865	122005064	-	pcg	0.4665	0.92	-0.12	0.0124	0.74	-0.43
down	LOC374009	ACO2	1	49647072	49667515	-	pcg	0.6966	0.95	-0.07	0.0271	0.75	-0.42
down	LOC395871	RAC1	14	8829045	8842913	-	pcg	0.0029	1.37	0.46	0.0257	0.75	-0.42
down	LOC415947	RBM10	12	3331250	3346467	+	pcg	0.1252	0.85	-0.23	0.0164	0.75	-0.42
down	LOC418281	ING4	1	77017976	77032724	-	pcg	0.6325	0.94	-0.09	0.0361	0.75	-0.42
down	LOC420741	SEPTIN7	2	46822423	46895294	-	pcg	0.0462	1.24	0.31	0.0222	0.75	-0.42
down	LOC420836	RANBP9	2	60253066	60290968	-	pcg	0.0009	1.44	0.53	0.0361	0.75	-0.42
down	LOC422127	LLGL2	18	11525690	11559953	+	pcg	0.8918	0.98	-0.03	0.0302	0.75	-0.42
down	LOC423853	POLL	6	23528558	23608684	+	pcg	0.0004	1.46	0.54	0.0258	0.75	-0.42
down	LOC424259	ZNF148	7	27651425	27689610	-	pcg	0.6216	1.04	0.06	0.0007	0.75	-0.42
down	LOC768535	TREMB1	26	4781429	4788017	-	pcg	0	0.43	-1.22	0.0424	0.75	-0.42
down	LOC771726	RCHY1	4	34172952	34177829	+	pcg	0.4522	0.92	-0.12	0.0191	0.75	-0.42
down	LOC415821	ZDHHC7	11	16662178	16679515	-	pcg	0.9925	1	0	0.0169	0.75	-0.41
down	LOC423689	SLC25A16	6	11383246	11399767	-	pcg	0.855	0.98	-0.03	0.009	0.75	-0.41
down	LOC424005	ACADL	7	2823739	2837418	-	pcg	0.0314	0.83	-0.28	0.0058	0.75	-0.41
down	LOC427146	MIER3	Z	18018971	18041550	-	pcg	0.7735	1.03	0.04	0.0069	0.76	-0.41
down	LOC428453	FYCO1	2	42659703	42695126	+	pcg	0.0496	1.22	0.28	0.0144	0.75	-0.41
down	LOC100858683	TUBGCP5	1	130460484	130483159	+	pcg	0.5745	0.94	-0.09	0.0252	0.76	-0.4
down	LOC395975	PACSIN2	1	68484872	68551376	-	pcg	0.0001	1.46	0.54	0.0222	0.76	-0.4
down	LOC416010	IP6K2	12	9146461	9165423	+	pcg	0	0.66	-0.61	0.0191	0.76	-0.4
down	LOC416513	DRG2	14	5009074	5017603	+	pcg	0.4766	0.91	-0.13	0.0453	0.76	-0.4
down	LOC421470	STRN	3	31752734	31817953	+	pcg	0.0102	0.75	-0.41	0.0404	0.76	-0.4
down	LOC428048	FBXL3	1	154395915	154410521	+	pcg	0.0748	0.85	-0.24	0.0086	0.76	-0.4
down	LOC770573	LRRC45	18	5619306	5628792	-	pcg	0.0046	0.76	-0.39	0.0176	0.76	-0.4
down	LOC415404	MYZAP	10	7265775	7338535	-	pcg	0.9466	1.01	0.01	0.0083	0.76	-0.39
down	LOC415450	SPPL2A	10	10757265	10785046	+	pcg	0.0037	1.29	0.36	0.0107	0.77	-0.39
down	LOC415475	MESDC2	10	12248038	12253899	+	pcg	0.0027	0.75	-0.42	0.026	0.76	-0.39
down	LOC416864	RSRC2	15	5911390	5923865	-	pcg	0.1762	0.87	-0.2	0.0192	0.76	-0.39
down	LOC417425	PSMD12	18	7766848	7774880	+	pcg	0.1903	0.86	-0.22	0.0473	0.76	-0.39
down	LOC417818	MON2	1	33110849	33188864	+	pcg	0.0037	0.74	-0.43	0.0318	0.76	-0.39
down	LOC424358	TROVE2	8	3502383	3519158	-	pcg	0.0002	1.51	0.59	0.0484	0.76	-0.39
down	LOC100859720	SDHB	21	190122	198493	+	pcg	0.7228	1.05	0.07	0.0482	0.77	-0.38
down	LOC419235	GID8	20	8774395	8780909	+	pcg	0.002	0.8	-0.33	0.0023	0.77	-0.38
down	LOC420267	LRP12	2	129575768	129628383	-	pcg	0.0014	0.76	-0.4	0.0131	0.77	-0.38
down	LOC420327	EFR3A	2	140279504	140346832	+	pcg	0.4722	0.92	-0.13	0.049	0.77	-0.38
down	LOC423655	JMJD1C	6	8484256	8648446	+	pcg	0.7081	1.05	0.07	0.0382	0.77	-0.38
down	LOC424346	DDX59	8	1442868	1465458	+	pcg	0.1523	1.16	0.22	0.0354	0.77	-0.38
down	LOC424538	GNG5	8	16301390	16304263	+	pcg	0.1885	1.16	0.22	0.0463	0.77	-0.38
down	LOC770243	SRP9	3	16944275	16952555	-	pcg	0.8817	1.02	0.02	0.0143	0.77	-0.38
down	LOC417588	NSRP1	19	6671662	6682397	+	pcg	0.1054	0.86	-0.22	0.0175	0.77	-0.37
down	LOC416295	CLK4	13	13727638	13736607	+	pcg	0.0635	0.86	-0.21	0.0056	0.78	-0.36
down	LOC419315	STX16	20	11416728	11427255	-	pcg	0.3195	1.1	0.13	0.0162	0.78	-0.36
down	LOC424151	DYNC1I2	7	17582714	17610087	-	pcg	0.1465	1.15	0.2	0.0217	0.78	-0.36
down	LOC395416	ABCC1	14	7648833	7700212	+	pcg	0.2177	0.89	-0.18	0.0319	0.78	-0.35
down	LOC395955	TSN	7	25865707	25871136	+	pcg	0.1784	0.88	-0.18	0.0263	0.79	-0.35
down	LOC416368	SCAMP1	Z	23259962	23298884	-	pcg	0.8313	1.02	0.03	0.0266	0.78	-0.35
down	LOC421287	PPP1R21	3	9137502	9167481	+	pcg	0	0.49	-1.03	0.0471	0.79	-0.35
down	LOC421343	RAB3GAP2	3	18437892	18478194	+	pcg	0.0076	0.78	-0.36	0.0361	0.78	-0.35
down	LOC424528	BCL10	8	16014036	16021904	+	pcg	0.1466	0.86	-0.22	0.0454	0.78	-0.35
down	LOC414880	LIMS1	1	136330053	136394041	+	pcg	0	0.54	-0.88	0.0335	0.79	-0.34
down	LOC420805	ADNP2	2	55724179	55742740	-	pcg	0	0.59	-0.76	0.0454	0.79	-0.34
down	LOC424550	DNAJB4	8	18554513	18579693	-	pcg	0	0.69	-0.54	0.0471	0.79	-0.34
down	LOC427258	OSTF1	Z	37458582	37480405	+	pcg	0.0016	1.31	0.38	0.0222	0.79	-0.34
down	LOC416320	VDAC1	13	15589702	15650724	+	pcg	0.1717	1.13	0.17	0.0244	0.8	-0.33
down	LOC422051	LOC422051	3	108646064	108652430	+	pcg	0	0.68	-0.55	0.0342	0.8	-0.33
down	LOC422747	EXOC1	4	64475079	64500033	-	pcg	0.0093	0.81	-0.31	0.0217	0.79	-0.33
down	LOC423461	DYNC1H1	5	48940014	48982545	+	pcg	0	0.54	-0.9	0.0484	0.79	-0.33
down	LOC396303	RNF13	9	23468793	23497155	-	pcg	0.6879	0.96	-0.05	0.0173	0.8	-0.32
down	LOC421647	SCAF8	3	49987100	50135771	+	pcg	0.1328	1.12	0.17	0.0127	0.8	-0.32
down	LOC419317	VAPB	20	11517244	11550853	-	pcg	0.0158	1.23	0.29	0.0399	0.81	-0.31
down	LOC427283	NANS	Z	52691613	52700535	-	pcg	0.0048	0.8	-0.32	0.025	0.81	-0.31
down	LOC768853	ARPP19	10	8751507	8762773	+	pcg	0.4774	0.93	-0.1	0.0397	0.81	-0.31
down	LOC422766	SLAIN2	4	65974974	66003365	-	pcg	0.0251	1.19	0.25	0.0417	0.82	-0.28
down	LOC417089	RALGPS1	17	10883537	10974071	+	pcg	0	0.46	-1.11	0	0.5	-1
down	LOC418820	PIBF1	1	156046150	156162598	-	pcg	0.0062	1.97	0.98	0.0221	0.5	-1
down	LOC121107774	LOC121107774	29	520901	527069	-	pcg	0.3	0.44	-1.19	0.0222	0.13	-3
down	INRAGALG00000013319	INRAGALG00000013319	4	85138862	85141907	-	lnc	0	18.16	4.18	2e-04	0.05	-4.25
down	INRAGALG00000007087	INRAGALG00000007087	2	60471338	60474786	-	lnc	0	0.06	-4.1	0	0.06	-4.1
down	FRAGALG000000017035	FRAGALG000000017035	W	3726999	3743627	-	lnc	0	0	-10.58	0.007	0.06	-3.99
down	INRAGALG00000000534	INRAGALG00000000534	1	34286795	34293575	-	lnc	0.3224	0.35	-1.5	0.0442	0.09	-3.53
down	INRAGALG00000009910	INRAGALG00000009910	3	2117069	2125100	-	lnc	0.1459	0.45	-1.15	9e-04	0.14	-2.88
down	INRAGALG00000005061	INRAGALG00000005061	14	8937543	8939650	+	lnc	0.0652	0.39	-1.37	6e-04	0.14	-2.86
down	INRAGALG00000008887	INRAGALG00000008887	21	3698467	3715582	-	lnc	1e-04	0.06	-4.13	0.0402	0.14	-2.83
down	INRAGALG00000013051	INRAGALG00000013051	4	69038071	69046577	-	lnc	0.0034	0.13	-3	0.0278	0.14	-2.82
down	LOC101747822	LOC101747822	2	8766594	8779420	+	lnc	0.119	2.3	1.2	0.001	0.14	-2.8
down	INRAGALG00000011193	INRAGALG00000011193	3	67074512	67077974	+	lnc	0.4095	1.75	0.81	0.0107	0.15	-2.72
down	INRAGALG00000009722	INRAGALG00000009722	27	5119560	5125081	-	lnc	0	0.13	-2.96	0	0.15	-2.71
down	INRAGALG00000006815	INRAGALG00000006815	2	43848491	43852124	-	lnc	0.2239	0.55	-0.85	3e-04	0.16	-2.66
down	INRAGALG00000011063	INRAGALG00000011063	3	59472841	59506175	+	lnc	0.1067	0.43	-1.23	0.0024	0.16	-2.63
down	ENSGALG00010004196	ENSGALG00010004196	1	165753866	165756574	-	lnc	0	10.03	3.33	0.0056	0.18	-2.48
down	INRAGALG00000009724	INRAGALG00000009724	27	5125249	5145905	-	lnc	0	0.14	-2.88	0	0.19	-2.39
down	INRAGALG00000008892	INRAGALG00000008892	21	4072197	4075677	+	lnc	0.1074	2.11	1.08	0.0012	0.19	-2.36
down	LOC121108563	LOC121108563	Z	67223747	67226445	+	lnc	0	0.09	-3.44	0.0014	0.19	-2.36
down	ENSGALG00010022970	ENSGALG00010022970	14	8932067	8947186	+	lnc	0.015	0.43	-1.22	0	0.2	-2.32
down	LOC124417814	LOC124417814	3	67772590	67796394	+	lnc	0	0	-9.46	0.0167	0.2	-2.32
down	INRAGALG00000002161	INRAGALG00000002161	1	118433237	118434042	+	lnc	0.787	1.19	0.25	0.0124	0.21	-2.27
down	LOC121110241	LOC121110241	3	2142138	2144859	-	lnc	0	0.23	-2.1	0	0.21	-2.27
down	ENSGALG00010007261	ENSGALG00010007261	5	38507627	38523664	+	lnc	0	0.1	-3.35	0.0019	0.21	-2.26
down	INRAGALG00000103901	INRAGALG00000103901	4	48781176	48786194	+	lnc	0	4.07	2.02	0	0.21	-2.24
down	INRAGALG00000006982	INRAGALG00000006982	2	54059808	54062598	-	lnc	0.4218	1.52	0.61	0.0048	0.21	-2.23
down	INRAGALG00000004397	INRAGALG00000004397	12	11050851	11053696	-	lnc	0.0165	3.19	1.68	0.0069	0.22	-2.2
down	INRAGALG00000009586	INRAGALG00000009586	26	5300498	5304568	+	lnc	0	7.71	2.95	0.0132	0.22	-2.2
down	INRAGALG00000003007	INRAGALG00000003007	1	176225607	176227477	+	lnc	0.0052	3.98	1.99	0.0098	0.22	-2.19
down	INRAGALG00000024935	INRAGALG00000024935	Z	57993648	57996043	-	lnc	0	0.11	-3.2	0.0274	0.24	-2.04
down	INRAGALG00000008406	INRAGALG00000008406	2	144849522	144851805	-	lnc	0.0029	0.35	-1.51	5e-04	0.25	-2.02
down	INRAGALG00000016627	INRAGALG00000016627	9	9134089	9135228	+	lnc	0	0.05	-4.41	0.0454	0.25	-2.02
down	INRAGALG00000012508	INRAGALG00000012508	4	30057531	30065490	+	lnc	0.0966	0.46	-1.13	0.0103	0.25	-2.01
down	DAVISGALG000040742	DAVISGALG000040742	10	10701222	10707693	+	lnc	0.1071	0.53	-0.91	0.0015	0.25	-1.97
down	INRAGALG00000102531	INRAGALG00000102531	2	103689021	103691634	-	lnc	0.1131	1.94	0.96	0.0038	0.26	-1.94
down	FRAGALG000000031797	FRAGALG000000031797	9	15782571	15789289	-	lnc	1e-04	4.86	2.28	0.0065	0.26	-1.94
down	INRAGALG00000016673	INRAGALG00000016673	9	10578750	10580231	-	lnc	0.7436	1.23	0.3	0.0407	0.27	-1.91
down	ENSGALG00010014117	ENSGALG00010014117	1	110895991	110901303	+	lnc	0	0.04	-4.54	0.0448	0.27	-1.9
down	LOC107052271	LOC107052271	Z	27971775	27974966	-	lnc	0	0.09	-3.54	0.0021	0.27	-1.9
down	FRAGALG000000003103	FRAGALG000000003103	2	148223131	148227593	+	lnc	0.4461	0.64	-0.64	0.0424	0.27	-1.9
down	FRAGALG000000062824	FRAGALG000000062824	11	14902520	14911777	+	lnc	0	11.45	3.52	0.0243	0.27	-1.9
down	INRAGALG00000009206	INRAGALG00000009206	23	5616823	5618579	+	lnc	0.339	0.59	-0.77	0.0385	0.27	-1.89
down	INRAGALG00000015171	INRAGALG00000015171	6	31484833	31486101	+	lnc	0.0411	0.49	-1.04	8e-04	0.27	-1.89
down	FRAGALG000000019509	FRAGALG000000019509	Z	17725092	17774547	+	lnc	0.0514	2.21	1.14	0.0044	0.27	-1.89
down	DAVISGALG000021767	DAVISGALG000021767	3	38057302	38060869	-	lnc	0	5.73	2.52	0.004	0.27	-1.87
down	INRAGALG00000016668	INRAGALG00000016668	9	10566775	10572606	-	lnc	0.6877	0.83	-0.26	0.0035	0.27	-1.87
down	INRAGALG00000007422	INRAGALG00000007422	2	83185528	83189738	+	lnc	0.069	0.46	-1.11	0.0076	0.27	-1.86
down	FRAGALG000000015442	FRAGALG000000015442	1	51069898	51070604	+	lnc	0.0027	4.16	2.06	0.0318	0.28	-1.82
down	DAVISGALG000026874	DAVISGALG000026874	4	33908013	33909382	+	lnc	0.3436	1.54	0.62	0.0111	0.29	-1.79
down	INRAGALG00000014819	INRAGALG00000014819	6	12650509	12650774	-	lnc	0.6509	1.27	0.35	0.0238	0.29	-1.78
down	INRAGALG00000016694	INRAGALG00000016694	9	10685450	10689421	+	lnc	0.2218	1.85	0.89	0.0302	0.29	-1.77
down	INRAGALG00000000466	INRAGALG00000000466	1	31145355	31148051	-	lnc	0	0.15	-2.72	0.0384	0.3	-1.75
down	INRAGALG00000008410	INRAGALG00000008410	2	144875613	144877967	-	lnc	0.0877	0.47	-1.09	0.0207	0.3	-1.72
down	INRAGALG00000002170	INRAGALG00000002170	1	119920622	119923100	+	lnc	0.0348	2.28	1.19	0.0092	0.31	-1.7
down	INRAGALG00000005112	INRAGALG00000005112	14	12108804	12112459	-	lnc	0.0948	0.46	-1.13	0.0355	0.31	-1.69
down	DAVISGALG000036569	DAVISGALG000036569	7	27904663	27905772	+	lnc	0.6618	0.83	-0.27	0.0062	0.31	-1.68
down	INRAGALG00000007464	INRAGALG00000007464	2	85585968	85590164	-	lnc	0.4375	0.7	-0.51	0.0166	0.31	-1.68
down	INRAGALG00000012504	INRAGALG00000012504	4	30041684	30043648	+	lnc	0.0249	0.35	-1.52	0.0419	0.31	-1.68
down	INRAGALG00000002972	INRAGALG00000002972	1	174873064	174873811	+	lnc	0.7084	1.21	0.27	0.0221	0.32	-1.66
down	NONGGAG004012	NONGGAG004012	4	34169267	34172771	-	lnc	0.2304	0.56	-0.85	0.0465	0.32	-1.64
down	INRAGALG00000006583	INRAGALG00000006583	2	26725937	26735190	-	lnc	0.7134	1.16	0.21	0.0047	0.33	-1.6
down	FRAGALG000000058834	FRAGALG000000058834	Z	58009564	58013947	-	lnc	0	0.16	-2.63	0.0069	0.33	-1.59
down	INRAGALG00000000184	INRAGALG00000000184	1	11463055	11463850	+	lnc	0.5058	0.73	-0.45	0.0288	0.33	-1.58
down	INRAGALG00000007568	INRAGALG00000007568	2	91601355	91606470	+	lnc	0	0.28	-1.82	0.0015	0.33	-1.58
down	INRAGALG00000006584	INRAGALG00000006584	2	26733365	26735817	+	lnc	0.0097	0.34	-1.56	0.0335	0.34	-1.57
down	INRAGALG00000015097	INRAGALG00000015097	6	27485169	27488246	+	lnc	0.0036	0.3	-1.72	0.032	0.34	-1.57
down	INRAGALG00000016222	INRAGALG00000016222	8	16347186	16348589	-	lnc	0.0023	0.28	-1.84	0.0366	0.34	-1.57
down	DAVISGALG000022985	DAVISGALG000022985	3	59447350	59459856	-	lnc	0.4298	1.39	0.48	0.0164	0.34	-1.56
down	INRAGALG00000104873	INRAGALG00000104873	7	189680	192099	-	lnc	0.8963	1.06	0.09	0.014	0.35	-1.53
down	DAVISGALG000027812	DAVISGALG000027812	4	54486139	54487990	-	lnc	0.9848	0.99	-0.01	0.0021	0.35	-1.52
down	LOC107055302	LOC107055302	1	104142120	104160691	-	lnc	0.6508	0.8	-0.32	0.043	0.35	-1.52
down	LOC101751851	LOC101751851	2	144866712	144908280	-	lnc	0.067	0.58	-0.79	0.0022	0.36	-1.49
down	INRAGALG00000008409	INRAGALG00000008409	2	144860790	144863783	-	lnc	0.0439	0.5	-1.01	0.0114	0.36	-1.48
down	INRAGALG00000106059	INRAGALG00000106059	Z	58659234	58660677	-	lnc	0.0795	1.82	0.86	0.0086	0.36	-1.48
down	LOC121107786	LOC121107786	29	557397	571375	-	lnc	0.0598	0.51	-0.96	0.0161	0.37	-1.45
down	LOC121113415	LOC121113415	8	1940606	2004321	+	lnc	7e-04	3.53	1.82	0.0332	0.37	-1.43
down	LOC121110493	LOC121110493	3	34385131	34401555	+	lnc	0	4.7	2.23	0.0131	0.38	-1.41
down	INRAGALG00000007683	INRAGALG00000007683	2	97770304	97771114	+	lnc	0.8058	0.89	-0.17	0.0466	0.38	-1.4
down	INRAGALG00000013972	INRAGALG00000013972	5	29675235	29678167	+	lnc	0.2958	0.66	-0.59	0.0306	0.38	-1.38
down	LOC107051836	LOC107051836	9	9843960	9855360	-	lnc	7e-04	2.39	1.26	0.0017	0.39	-1.36
down	LOC121108993	LOC121108993	1	98225563	98235502	-	lnc	0.1694	1.62	0.7	0.0185	0.39	-1.36
down	INRAGALG00000025012	INRAGALG00000025012	Z	64213317	64217119	-	lnc	0.2051	0.62	-0.7	0.0331	0.39	-1.35
down	INRAGALG00000024678	INRAGALG00000024678	Z	42872297	42874467	+	lnc	0.0012	3.06	1.61	0.0318	0.4	-1.33
down	LOC107054432	LOC107054432	12	11075171	11089818	-	lnc	0.0531	0.69	-0.54	0	0.4	-1.33
down	NONGGAG004376	NONGGAG004376	5	17096516	17100665	-	lnc	0.6829	1.18	0.24	0.0261	0.4	-1.32
down	INRAGALG00000005200	INRAGALG00000005200	15	567804	568645	+	lnc	0.5283	0.78	-0.35	0.0254	0.4	-1.31
down	INRAGALG00000103147	INRAGALG00000103147	28	2910114	2911752	-	lnc	0	0.19	-2.42	0.0043	0.4	-1.31
down	ENSGALG00010011258	ENSGALG00010011258	7	33050456	33058665	-	lnc	0.9383	0.96	-0.05	0.045	0.41	-1.28
down	LOC121109058	LOC121109058	1	67262070	67267876	+	lnc	0.7706	1.13	0.18	0.0451	0.42	-1.25
down	INRAGALG00000002923	INRAGALG00000002923	1	171443016	171445527	-	lnc	0.2505	1.52	0.6	0.0403	0.43	-1.23
down	INRAGALG00000006480	INRAGALG00000006480	2	19694705	19696208	-	lnc	0.3516	1.43	0.52	0.0478	0.43	-1.23
down	INRAGALG00000011658	INRAGALG00000011658	3	101088620	101089316	-	lnc	0	0.15	-2.75	1e-04	0.43	-1.23
down	LOC107049214	LOC107049214	1	118318726	118332463	+	lnc	2e-04	0.33	-1.62	0.0231	0.43	-1.23
down	FRAGALG000000086211	FRAGALG000000086211	2	19692050	19696824	-	lnc	0.1947	1.55	0.64	0.0288	0.43	-1.23
down	DAVISGALG000010515	DAVISGALG000010515	1	136435688	136436441	+	lnc	0.1208	0.63	-0.66	0.012	0.43	-1.22
down	LOC124417208	LOC124417208	14	4785903	4788305	+	lnc	0.8037	1.08	0.11	0.0045	0.44	-1.19
down	LOC107051656	LOC107051656	2	60439971	60520685	-	lnc	1e-04	0.28	-1.83	0.0474	0.44	-1.18
down	FRAGALG000000085666	FRAGALG000000085666	2	128118844	128131236	-	lnc	0.2481	0.68	-0.55	0.0274	0.44	-1.18
down	ENSGALG00010013946	ENSGALG00010013946	1	49921206	49928466	-	lnc	0.0248	1.54	0.63	2e-04	0.45	-1.16
down	INRAGALG00000004123	INRAGALG00000004123	12	286372	288065	+	lnc	0.0022	0.38	-1.39	0.0399	0.45	-1.16
down	INRAGALG00000104112	INRAGALG00000104112	4	54480744	54485217	-	lnc	0.7325	0.92	-0.12	3e-04	0.45	-1.16
down	ENSGALG00010014251	ENSGALG00010014251	1	104211811	104231281	+	lnc	0.0043	0.48	-1.05	0.009	0.45	-1.15
down	LOC101749926	LOC101749926	3	24479231	24599348	-	lnc	0.0867	0.61	-0.72	0.0211	0.46	-1.14
down	INRAGALG00000104055	INRAGALG00000104055	4	33435150	33438348	-	lnc	0.7623	0.91	-0.14	0.0197	0.47	-1.08
down	LOC107049798	LOC107049798	6	798339	809548	+	lnc	0	0.05	-4.46	0.0177	0.48	-1.06
down	LOC107055181	LOC107055181	26	4747052	4750506	-	lnc	0	0.43	-1.23	0.0024	0.49	-1.04
down	LOC107052740	LOC107052740	2	114979214	114983968	-	lnc	0.7436	1.1	0.14	0.0139	0.49	-1.03
down	INRAGALG00000001463	INRAGALG00000001463	1	78441912	78448357	-	lnc	0.4506	0.8	-0.32	0.0251	0.49	-1.02
down	ENSGALG00010002242	ENSGALG00010002242	2	97766585	97874425	+	lnc	0.423	0.81	-0.3	0.0128	0.5	-1.01
down	INRAGALG00000008809	INRAGALG00000008809	21	264557	267516	-	lnc	0.178	0.71	-0.5	0.0194	0.51	-0.98
down	INRAGALG00000100799	INRAGALG00000100799	1	105343973	105345486	-	lnc	0.3515	1.31	0.39	0.0464	0.52	-0.94
down	LOC101752215	LOC101752215	1	14166150	14174908	-	lnc	0.9072	1.03	0.04	0.0069	0.52	-0.94
down	DAVISGALG000004820	DAVISGALG000004820	1	25508103	25509723	+	lnc	0.3202	1.28	0.36	0.0196	0.52	-0.93
down	INRAGALG00000016653	INRAGALG00000016653	9	9857203	9867726	-	lnc	0.5253	0.86	-0.22	0.0116	0.52	-0.93
down	DAVISGALG000007691	DAVISGALG000007691	1	78453908	78456951	-	lnc	0.0088	0.54	-0.88	0.0284	0.54	-0.9
down	INRAGALG00000101804	INRAGALG00000101804	17	6935701	6941055	-	lnc	0.02	0.59	-0.77	0.0221	0.53	-0.9
down	LOC777017	LOC777017	6	713899	1229167	-	lnc	0	0.23	-2.12	0.0029	0.54	-0.88
down	INRAGALG00000012731	INRAGALG00000012731	4	45257571	45268508	-	lnc	0.1227	0.7	-0.52	0.0272	0.55	-0.87
down	LOC121110245	LOC121110245	3	3483345	3496428	+	lnc	0	2.43	1.28	0.0253	0.55	-0.86
down	DAVISGALG000008131	DAVISGALG000008131	1	85106412	85107602	+	lnc	0.0182	1.71	0.78	0.0373	0.56	-0.84
down	LOC121107759	LOC121107759	28	4723455	4730353	+	lnc	0.0156	1.56	0.64	0.0082	0.57	-0.82
down	LOC124417126	LOC124417126	10	5403834	5412835	-	lnc	0.5743	0.86	-0.22	0.049	0.57	-0.81
down	ENSGALG00010003118	ENSGALG00010003118	6	32787076	32797709	-	lnc	0	2.29	1.2	0.011	0.57	-0.8
down	LOC421515	LOC421515	3	37919000	37958234	+	lnc	0.065	0.66	-0.61	0.0436	0.57	-0.8
down	DAVISGALG000004213	DAVISGALG000004213	1	14224774	14225320	-	lnc	0.9303	1.02	0.04	0.0364	0.58	-0.79
down	ENSGALG00010020668	ENSGALG00010020668	10	13195979	13221047	+	lnc	1e-04	0.54	-0.89	0.0078	0.59	-0.75
down	DAVISGALG000008977	DAVISGALG000008977	1	105514239	105517731	+	lnc	0	0.5	-1.01	0.0026	0.61	-0.72
down	LOC101750931	LOC101750931	1	3784910	3804284	+	lnc	0	0.33	-1.6	0.0136	0.61	-0.72
down	ENSGALG00010026757	ENSGALG00010026757	15	2795403	2798248	-	lnc	0.4626	0.86	-0.21	0.0253	0.62	-0.7
down	FRAGALG000000035719	FRAGALG000000035719	1	77107471	77111214	+	lnc	0	3.49	1.81	0.0151	0.65	-0.62
down	DAVISGALG000040015	DAVISGALG000040015	9	22482509	22483537	+	lnc	0	0.56	-0.85	0.0114	0.69	-0.54
down	FRAGALG000000009299	FRAGALG000000009299	1	30859882	30891217	-	lnc	0.5453	1.07	0.1	0.0029	0.7	-0.51
down	DAVISGALG000002494	DAVISGALG000002494	Z	52708621	52710212	-	lnc	0.0077	0.77	-0.37	0.0198	0.76	-0.4
down	INRAGALG00000014420	INRAGALG00000014420	5	50981071	50988139	-	lnc	0.6413	1.16	0.22	0.0424	0.5	-1
